# Supplementary material
Source: ML conference proceedings conference paper supplement (https://openreview.net/forum?id=lbjKWBzK9k)
Supplement: supplementary_material [file nn_gd_gen.pdf › nn_gd_gen.pdf]

---

# Do Neural Nets Need Gradient Descent to Generalize? Matrix Factorization as a Theoretical Testbed

---

Anonymous Author(s)

Affiliation

Address

email

## Abstract

1       Conventional wisdom attributes the mysterious generalization abilities of over-  
2       parameterized neural networks to gradient descent (and its variants). The recent  
3       volume hypothesis challenges this view: it posits that these generalization abilities  
4       persist even when gradient descent is replaced by Guess & Check (G&C), *i.e.*, by  
5       drawing weight settings until one that fits the training data is found. The validity of  
6       the volume hypothesis for wide and deep neural networks remains an open question.  
7       In this paper, we theoretically investigate this question for matrix factorization  
8       (with linear and non-linear activation)—a common testbed in neural network theory.  
9       We first prove that generalization under G&C deteriorates with increasing  
10      width, establishing what is, to our knowledge, the first case where G&C is provably  
11      inferior to gradient descent. Conversely, we prove that generalization under G&C  
12      improves with increasing depth, revealing a stark contrast between wide and deep  
13      networks, which we further validate empirically. These findings suggest that even  
14      in simple settings, there may not be a simple answer to the question of whether  
15      neural networks need gradient descent to generalize well.

## 16   1 Introduction

17   *Overparameterized neural networks* trained by (variants of) *gradient descent* are a cornerstone of  
18   modern artificial intelligence (AI) [103, 43, 2, 15, 56, 2]. Typically, an overparameterized neural  
19   network can fit its training data with any of multiple weight settings, some of which *generalize* well  
20   (*i.e.*, perform well on unseen test data), while others do not. The fact that weight settings found by  
21   gradient descent often generalize well is a mystery attracting vast attention [117, 50, 78, 75, 73].  
22   Conventional wisdom states that this phenomenon stems from a special implicit bias induced by  
23   gradient descent when applied to overparameterized neural networks [93, 37, 55, 60].

24   Recently, it has been argued that gradient descent is not necessary for overparameterized neural  
25   networks to generalize well, and in fact, any reasonable (non-adversarial) optimizer that fits the  
26   training data can suffice [20, 16, 102, 102, 11]. Notable empirical support for this argument was  
27   provided by Chiang et al. [20], who demonstrated that generalization comparable to that of gradient  
28   descent can be attained by *Guess and Check* (G&C), *i.e.*, by repeatedly drawing weight settings from  
29   a specified *prior distribution*, until a weight setting that happens to fit the training data is drawn. For a  
30   particular prior distribution over weight settings, hypothesizing that G&C attains good generalization  
31   is equivalent to the so-called *volume hypothesis* [20, 77], which states the following. Define the  
32   *volume* of a collection of weight settings to be the probability assigned to it by a *posterior distribution*  
33   obtained from conditioning the prior distribution on the training data being fit. Then, the volume of  
34   weight settings that generalize well is much greater than the volume of weight settings that do not.

35   Aside from Chiang et al. [20], several works have supported the volume hypothesis in certain cases  
36   involving wide and deep overparameterized neural networks [16, 40, 41]. However, the literature also

includes contrasting evidence. In particular, Peleg and Hein [77] systematically experimented with overparameterized neural networks of varying width and depth, and found that the generalization attainable by G&C is inferior to that of gradient descent, most prominently with larger network widths. Overall, the current literature on overparameterized neural networks portrays a conflicting picture regarding how the generalization attainable by G&C compares to that of gradient descent, and how this depends on network width and depth.

In this paper, we present a theoretical study that takes a step toward elucidating the foregoing picture, *i.e.*, toward delineating the extent to which wide or deep overparameterized neural networks need gradient descent in order to generalize well. Our theoretical study centers on *matrix factorization*—a common testbed in the theory of neural networks, used for studying generalization [36, 5, 63, 23, 111, 66] as well as other phenomena [35, 12, 94, 34]. Past analyses of matrix factorization have contributed to real-world neural networks—yielding theoretical insights [3, 4], concrete mathematical tools [83, 84], and practical methods that improve empirical performance [54, 95]. In its basic form, matrix factorization is akin to using overparameterized neural networks with linear (no) activation for tackling the low rank matrix sensing problem. We consider a more general form that allows for alternative (non-linear) activations as well [81].

Our first contribution is a theorem proving that, with an anti-symmetric activation (*e.g.*, linear, tanh or sine), if the width of a network increases, then the generalization attained by G&C deteriorates, to the point of being no better than chance—or more precisely, no better than the generalization attained by randomly drawing a single weight setting from the prior distribution while disregarding the training data. The theorem applies to any prior distribution satisfying mild conditions, including the canonical Gaussian and uniform distributions considered in previous works [16, 40]. In light of known results proving that gradient descent attains good generalization [21, 64, 65, 55, 93], we conclude that there are cases where the generalization attainable by G&C is provably inferior to that of gradient descent—that is, cases where overparameterized neural networks provably need gradient descent in order to generalize well. To our knowledge, this is the first formal proof of the existence of such cases.

As a second contribution, we provide a theorem proving—for linear activation and a normalized Gaussian prior distribution—that if the depth of a network increases, then the generalization attained by G&C improves, to the point of being perfect. This theorem, which essentially implies that increasing network depth renders gradient descent not necessary for good generalization, stands in stark contrast to our analysis of increasing network width. We empirically showcase this contrast, demonstrating that in matrix factorization, the generalization attained by G&C improves with network depth but deteriorates with network width, whereas gradient descent attains good generalization throughout.

The findings in this paper suggest that even in simple settings, there may not be a simple answer to the question of whether neural networks need gradient descent to generalize well: the answer may hinge on subtle dependencies between network width and depth. We hope that our study of matrix factorization will serve as a stepping stone towards deriving a complete answer for real-world settings, thereby illuminating the role of gradient descent in modern AI.

## 1.1 Paper Organization

The remainder of the paper is organized as follows. Section 2 reviews related work. Section 3 introduces notation and the setting we study. Section 4 delivers our theoretical analysis, followed by Section 5 which presents an empirical demonstration. Section 6 discusses the limitations of our theory. Finally, Section 7 concludes.

## 2 Related Work

Numerous works have been devoted to understanding why overparameterized neural networks trained by gradient descent (or variants thereof) often generalize well [117, 50, 10, 52, 1, 9, 118, 74, 19, 91, 87]. While this generalization is most commonly attributed to an implicit bias induced by gradient descent [90, 57, 76, 93, 37, 64, 51, 110, 21, 116, 6, 70, 65, 25, 112, 109, 69, 55, 107, 60, 82], an emerging view is that much of it stems from the architectures of neural networks. Results supporting this emerging view include: (i) results that establish a certain notion of simplicity when a weight setting is drawn from a prior distribution [11, 102, 47, 71, 27]; (ii) results that establish good

generalization in a Bayesian framework, *i.e.*, when predictions are defined through an expectation over weight settings, where the probability of weight settings is higher the better they fit the training data [108, 49]; and (iii) results that establish good generalization with G&C, *i.e.*, when a weight setting is drawn from a posterior distribution obtained from conditioning a prior distribution on the training data being fit [40, 16, 41, 98]. Among these, the third category—*i.e.*, results concerning G&C—is arguably the most aligned with the standard learning paradigm, as it involves selecting a single weight setting that fits the training data.

Chiang et al. [20] and Peleg and Hein [77] compared the generalization attainable by G&C to that of gradient descent, by experimenting with overparameterized neural networks of varying width and depth. Chiang et al. [20] provided evidence suggesting that: (i) the generalization attainable by G&C is on par with that of gradient descent; and (ii) increasing the width of an overparameterized neural network improves the generalization of G&C. Peleg and Hein [77] pointed to confounding factors in the experimental protocol of Chiang et al. [20], and made different observations, namely: (i) the generalization attainable by G&C is inferior to that of gradient descent; (ii) increasing the width of an overparameterized neural network improves the generalization of gradient descent but not that of G&C; and (iii) increasing the depth of an overparameterized neural network deteriorates the generalization of both gradient descent and G&C. The latter observation does not align with the conventional wisdom, *i.e.*, with the extensive empirical and theoretical evidence that deep neural networks generalize better than shallow ones [5, 96, 68, 42]. Peleg and Hein [77] accordingly hedge this observation, effectively implying that it may result from confounding factors.

Our work is similar to those of Chiang et al. [20] and Peleg and Hein [77] in that it compares the generalization attainable by G&C to that of gradient descent for overparameterized neural networks of varying width and depth. It markedly differs from these past works in that it provides a rigorous theoretical analysis (the works of Chiang et al. [20] and Peleg and Hein [77] are purely empirical), and focuses on a simplified model (matrix factorization). This allows for a controlled study free from confounding factors. In particular, it allows us to prove—for the first time, to the best of our knowledge—that there are indeed cases where the generalization attainable by G&C is inferior to that of gradient descent.

### 3 Preliminaries

#### 3.1 Notation

We use non-boldface lowercase letters for denoting scalars (*e.g.*,  $\alpha \in \mathbb{R}$ ,  $d \in \mathbb{N}$ ), boldface lowercase letters for denoting vectors (*e.g.*,  $\mathbf{v} \in \mathbb{R}^d$ ), and non-boldface uppercase letters for denoting matrices (*e.g.*,  $A \in \mathbb{R}^{d,d}$ ). For  $d \in \mathbb{N}$ , we define  $[d] := \{1, \dots, d\}$ . We let  $\|\cdot\|_2$  and  $\|\cdot\|_F$  stand for the Euclidean norm of a vector and the Frobenius norm of a matrix, respectively.

#### 3.2 Low Rank Matrix Sensing

*Low rank matrix sensing* is a fundamental and extensively studied problem in science and engineering [33, 99, 80, 17, 92, 111]. In its basic form, the goal in low rank matrix sensing is to reconstruct a low rank matrix based on linear measurements. Namely, for  $m, m', r, n \in \mathbb{N}$ , where  $r < \min\{m, m'\}$  and  $n < m \cdot m'$ , the goal is to reconstruct a *ground truth* matrix  $W^* \in \mathbb{R}^{m,m'}$  of rank  $r$  based on  $(A_i \in \mathbb{R}^{m,m'}, y_i \in \mathbb{R})_{i=1}^n$ , where:

$$y_i = \langle A_i, W^* \rangle := \text{Tr}(A_i^\top W^*), \quad i \in [n]. \quad (1)$$

We refer to  $(A_i)_{i=1}^n$  as *measurement matrices*, and to  $(y_i)_{i=1}^n$  as the corresponding *measurements*.

The above can be cast as a supervised learning problem. Indeed, we may identify a matrix  $W \in \mathbb{R}^{m,m'}$  with the linear functional that maps  $A \in \mathbb{R}^{m,m'}$  to  $\langle A, W \rangle \in \mathbb{R}$ . Our goal is then to learn the linear functional  $W^*$  based on the *training data*  $(A_i, y_i)_{i=1}^n$ , *i.e.*, based on the training *instances*  $(A_i)_{i=1}^n$  and their corresponding *labels*  $(y_i)_{i=1}^n$ . The training data induces a *training loss* defined over linear functionals (or equivalently, over matrices):

$$\mathcal{L}_{\text{train}} : \mathbb{R}^{m,m'} \rightarrow \mathbb{R}_{\geq 0}, \quad \mathcal{L}_{\text{train}}(W) := \frac{1}{n} \sum_{i=1}^n (\langle A_i, W \rangle - y_i)^2. \quad (2)$$

Any  $W \in \mathbb{R}^{m,m'}$  that minimizes the training loss, *i.e.*, that fits the training data, necessarily coincides with  $W^*$  on instances in  $\text{span}\{A_i\}_{i=1}^n$  (meaning  $\langle A, W \rangle$  coincides with  $\langle A, W^* \rangle$  for all

137  $A \in \text{span}\{A_i\}_{i=1}^n$ ). Accordingly, we quantify generalization (performance on unseen test data) via  
 138 instances orthogonal to  $\text{span}\{A_i\}_{i=1}^n$ , or more precisely, through the following *generalization loss*:

$$\mathcal{L}_{\text{gen}} : \mathbb{R}^{m,m'} \rightarrow \mathbb{R}_{\geq 0} \quad , \quad \mathcal{L}_{\text{gen}}(W) := \frac{1}{|\mathcal{B}|} \sum_{A \in \mathcal{B}} (\langle A, W \rangle - \langle A, W^* \rangle)^2, \quad (3)$$

139 where  $\mathcal{B} \subset \mathbb{R}^{m,m'}$  is some orthonormal basis for the orthogonal complement of  $\text{span}\{A_i\}_{i=1}^n$  (it is  
 140 straightforward to show that  $\mathcal{L}_{\text{gen}}(\cdot)$  is independent of the particular choice of  $\mathcal{B}$ ).

141 Much of the literature on low rank matrix sensing concerns a canonical special case where the  
 142 measurement matrices  $(A_i)_{i=1}^n$  satisfy a *restricted isometry property (RIP)* as defined below [33].  
 143 Such a property holds with high probability when  $(A_i)_{i=1}^n$  are drawn from common distributions, for  
 144 example Gaussian or Bernoulli [8].

145 **Definition 1.** We say that the measurement matrices  $(A_i)_{i=1}^n$  satisfy a *restricted isometry property*  
 146 *(RIP) of order  $\rho \in \mathbb{N}$  with a constant  $\delta \in (0, 1)$* , if for every matrix  $W \in \mathbb{R}^{m,m'}$  whose rank is at  
 147 most  $\rho$ , it holds that:

$$(1 - \delta)\|W\|_F^2 \leq \|\mathcal{A}(W)\|_2^2 \leq (1 + \delta)\|W\|_F^2,$$

148 where  $\mathcal{A}(W) := (\langle A_1, W \rangle, \dots, \langle A_n, W \rangle)^\top \in \mathbb{R}^n$ .

### 149 3.3 Matrix Factorization

150 *Matrix factorization* is a common testbed in the theory of neural networks, used for studying gen-  
 151 eralization [36, 5, 63, 23, 111, 66] as well as other phenomena [35, 12, 94, 34]. Analyses of matrix  
 152 factorization have contributed to real-world neural networks—yielding theoretical insights [3, 4], con-  
 153 crete mathematical tools [83, 84], and practical methods that improve empirical performance [54, 95].

154 In its basic form, matrix factorization is akin to using overparameterized neural networks with linear  
 155 (no) activation for tackling the low rank matrix sensing problem described in Section 3.2. We consider  
 156 a more general form that allows for alternative (non-linear) activations as well [81]. Concretely, in  
 157 our context, a matrix factorization with *activation*  $\sigma : \mathbb{R} \rightarrow \mathbb{R}$ , *width*  $k \in \mathbb{N}$  and *depth*  $d \in \mathbb{N}_{\geq 2}$ ,  
 158 refers to learning a matrix  $W \in \mathbb{R}^{m,m'}$  aimed at approximating the ground truth rank  $r$  matrix  $W^*$ ,  
 159 through the following parameterization:

$$W = W_d \sigma(W_{d-1} \sigma(W_{d-2} \cdots \sigma(W_1)) \cdots), \quad (4)$$

160 where  $W_1 \in \mathbb{R}^{k,m'}$ ,  $W_j \in \mathbb{R}^{k,k}$  for all  $j \in \{2, \dots, d-1\}$ ,  $W_d \in \mathbb{R}^{m,k}$ , and the application of  $\sigma(\cdot)$   
 161 to a matrix signifies an application of  $\sigma(\cdot)$  to each of the matrix’s entries. We refer to  $W_1, \dots, W_d$  as  
 162 the *weight matrices* of the factorization, and to a value assumed by  $(W_1, \dots, W_d)$  as a *weight setting*.  
 163 Our interest lies in the overparameterized regime, where the width  $k$  does not restrict the rank of the  
 164 learned matrix  $W$ . Accordingly, we assume throughout that  $k \geq \min\{m, m'\}$ .

165 The low rank matrix sensing losses  $\mathcal{L}_{\text{train}}(\cdot)$  and  $\mathcal{L}_{\text{gen}}(\cdot)$  in Equations (2) and (3), respectively, induce  
 166 training and generalization losses for the matrix factorization. With a slight overloading of notation,  
 167 these are:

$$\mathcal{L}_{\text{train}}(W_1, \dots, W_d) := \frac{1}{n} \sum_{i=1}^n \left( \langle A_i, W_d \sigma(W_{d-1} \cdots \sigma(W_1) \cdots) \rangle - y_i \right)^2, \quad (5)$$

168 and:

$$\mathcal{L}_{\text{gen}}(W_1, \dots, W_d) := \frac{1}{|\mathcal{B}|} \sum_{A \in \mathcal{B}} \left( \langle A, W_d \sigma(W_{d-1} \cdots \sigma(W_1) \cdots) \rangle - \langle A, W^* \rangle \right)^2. \quad (6)$$

### 169 3.4 Gradient Descent

170 Similar to real-world neural networks, matrix factorization admits a non-convex training loss, for  
 171 which a baseline optimizer is *gradient descent* emanating from small random initialization [24, 100].  
 172 Various studies—theoretical [24, 12, 36, 34, 120] and empirical [5, 30, 14]—were devoted to training  
 173 matrix factorization with this baseline optimizer. In the context of Section 3.3, it amounts to  
 174 implementing the following iterations:

$$W_j^{(t+1)} \leftarrow W_j^{(t)} - \eta \frac{\partial}{\partial W_j} \mathcal{L}_{\text{train}}(W_1^{(t)}, \dots, W_d^{(t)}) \quad , \quad j \in [d] \quad , \quad t \in \mathbb{N} \cup \{0\}, \quad (7)$$

175 where  $\mathcal{L}_{\text{train}}(\cdot)$  is the training loss defined in Equation (5),  $\eta \in \mathbb{R}_{>0}$  is a predetermined *step size* (learn-  
 176 ing rate), and  $(W_1^{(0)}, \dots, W_d^{(0)})$  holds a randomly chosen initial weight setting of small magnitude.

### 3.5 Guess & Check

A conceptual alternative to gradient descent is *Guess and Check* (G&C) [20, 16, 41]. In the context of the matrix factorization described in Section 3.3, let  $\mathcal{P}(\cdot)$  be a probability distribution over weight settings, *i.e.*, over values that may be assumed by the tuple of weight matrices  $(W_1, \dots, W_d)$ . Regard  $\mathcal{P}(\cdot)$  as a *prior distribution*, and let  $\epsilon_{\text{train}} > 0$  be some threshold on the training loss  $\mathcal{L}_{\text{train}}(\cdot)$  (Equation (5)). Applying G&C to the matrix factorization then consists of repeatedly drawing  $(W_1, \dots, W_d)$  from  $\mathcal{P}(\cdot)$ , until the condition  $\mathcal{L}_{\text{train}}(W_1, \dots, W_d) < \epsilon_{\text{train}}$  is met. From a statistical perspective, this is equivalent<sup>1</sup> to a single draw of  $(W_1, \dots, W_d)$  from  $\mathcal{P}(\cdot | \mathcal{L}_{\text{train}}(W_1, \dots, W_d) < \epsilon_{\text{train}})$ , where the latter is the *posterior distribution* obtained from conditioning  $\mathcal{P}(\cdot)$  on the event  $\mathcal{L}_{\text{train}}(W_1, \dots, W_d) < \epsilon_{\text{train}}$ .

## 4 Theoretical Analysis

Consider a matrix factorization (Section 3.3) optimized by gradient descent (Section 3.4) or G&C (Section 3.5). A large body of theoretical work [36, 62, 5, 66, 29, 111, 119, 63, 92, 53, 115] has been devoted to establishing that gradient descent attains good generalization under various choices of width and depth for the factorization. In this section we tackle the question of whether gradient descent is needed for good generalization. Specifically, we theoretically analyze the generalization attainable by G&C as the width and depth of the factorization vary.

### 4.1 Distributions Over Weight Settings

Both G&C and gradient descent are defined with respect to a probability distribution over weight settings: for G&C it is the prior distribution (see Section 3.5), and for gradient descent it is the distribution from which initialization is drawn (see Section 3.4). We consider a broad class of distributions over weight settings specified by Definitions 2 and 3 below.

Definition 2 defines a *regular* distribution over  $\mathbb{R}$  as one that has zero mean, is symmetric, and assigns positive probability to every neighborhood of the origin. This definition of regularity covers canonical distributions over  $\mathbb{R}$ , for example zero-centered Gaussian distributions and uniform distributions over symmetric intervals. Definition 3 builds on Definition 2 to specify the class of distributions over weight settings we consider. Namely, given a regular distribution (over  $\mathbb{R}$ )  $\mathcal{Q}(\cdot)$ , Definition 3 defines a distribution over weight settings *generated by*  $\mathcal{Q}(\cdot)$  as one in which entries are independently drawn from  $\mathcal{Q}(\cdot)$ , and then subject to Kaiming scaling [44], *i.e.*, scaling that preserves magnitudes when the width of the factorization grows. This definition of a generated distribution covers Kaiming Gaussian and Kaiming Uniform distributions: common choices for the initialization of gradient descent [46, 114, 97] and the prior of G&C [16, 40, 41]. Definition 3 also defines a distribution over weight settings *generated by*  $\mathcal{Q}(\cdot)$  *with normalization*, as one that is generated by  $\mathcal{Q}(\cdot)$ , with an additional normalization (scaling) that ensures the product of weight matrices has unit norm. The role of this normalization is to preserve magnitudes when the depth of the factorization grows, analogously to the role of normalization techniques applied when training real-world deep neural networks [101, 113, 89, 7, 48].

**Definition 2.** Let  $\mathcal{Q}(\cdot)$  be a probability distribution over  $\mathbb{R}$ . We say that  $\mathcal{Q}(\cdot)$  is *regular* if the following conditions hold: (i)  $\mathcal{Q}(\cdot)$  has zero mean and all of its moments exist, *i.e.*,  $\mathbb{E}_{\alpha \sim \mathcal{Q}(\cdot)}[\alpha] = 0$  and  $\mathbb{E}_{\alpha \sim \mathcal{Q}(\cdot)}[|\alpha|^p] < \infty$  for all  $p \in \mathbb{N}$ ; (ii)  $\mathcal{Q}(\cdot)$  is symmetric, meaning  $\alpha \sim \mathcal{Q}(\cdot)$  implies  $-\alpha \sim \mathcal{Q}(\cdot)$ ; and (iii)  $\mathcal{Q}(\cdot)$  assigns positive probability to every neighborhood of the origin (*i.e.*, for any neighborhood  $\mathcal{I}$  of 0 in  $\mathbb{R}$ , if  $\alpha \sim \mathcal{Q}(\cdot)$  then the probability of the event  $\alpha \in \mathcal{I}$  is positive).

**Definition 3.** Let  $\mathcal{Q}(\cdot)$  be a regular probability distribution over  $\mathbb{R}$  (Definition 2), and let  $\mathcal{P}(\cdot)$  be a probability distribution over weight settings, *i.e.*, over values that may be assumed by the tuple of weight matrices  $(W_1, \dots, W_d)$ . For every  $j \in [d]$ , denote by  $m_j$  the number of columns in the weight matrix  $W_j$ , and by  $\mathcal{Q}_j(\cdot)$  the probability distribution over  $\mathbb{R}$  obtained from scaling  $\mathcal{Q}(\cdot)$  by  $1/\sqrt{m_j}$  (meaning  $\alpha \sim \mathcal{Q}_j(\cdot)$  implies  $\sqrt{m_j}\alpha \sim \mathcal{Q}(\cdot)$ ). We say that  $\mathcal{P}(\cdot)$  is *generated by*  $\mathcal{Q}(\cdot)$  if  $(W_1, \dots, W_d) \sim \mathcal{P}(\cdot)$  implies that  $W_1, \dots, W_d$  are statistically independent, and for every  $j \in [d]$  the entries of  $W_j$  are independently distributed per  $\mathcal{Q}_j(\cdot)$ . We say that  $\mathcal{P}(\cdot)$  is *generated by*  $\mathcal{Q}(\cdot)$  *with normalization* if  $(W_1, \dots, W_d) \sim \mathcal{P}(\cdot)$  can be implemented by drawing  $(W_1, \dots, W_d)$  from a distribution generated by  $\mathcal{Q}(\cdot)$ , and then dividing by  $\|W_d \cdots W_1\|^{1/d}$  each entry of  $W_j$ , for  $j \in [d]$ .

<sup>1</sup>See [32, 86] for folklore arguments justifying the equivalence.

## 4.2 Increasing Width: Need for Gradient Descent

In this subsection, we consider a regime where the width of the matrix factorization increases, and prove that gradient descent is needed for good generalization. In particular, we establish cases where the generalization attainable by G&C is provably inferior to that of gradient descent. To our knowledge, this is the first formal proof of the existence of such cases.

Definition 4 below defines an *admissible* activation as one that is non-constant, piece-wise continuously differentiable, has a polynomially bounded derivative, and does not vanish on both sides of the origin. This definition of admissibility covers most activations used in practice (e.g., tanh, sigmoid, ReLU and Leaky ReLU [88, 59, 72, 67]).

**Definition 4.** We say that the activation  $\sigma : \mathbb{R} \rightarrow \mathbb{R}$  is *admissible* if the following conditions hold: (i)  $\sigma(\cdot)$  is non-constant; (ii)  $\sigma(\cdot)$  is (continuous and) piece-wise continuously differentiable; (iii) the derivative of  $\sigma(\cdot)$  is polynomially bounded, i.e., there exist  $p \in \mathbb{N}$  and  $c \in \mathbb{R}_{>0}$  such that  $\sigma'(\alpha) \leq c(1 + |\alpha|^p)$  for every  $\alpha \in \mathbb{R}$  at which  $\sigma'(\cdot)$  is defined; and (iv)  $\sigma(\cdot)$  does not vanish on both sides of the origin, i.e., any neighborhood of 0 in  $\mathbb{R}$  includes some  $\alpha \in \mathbb{R}$  for which  $\sigma(\alpha) \neq 0$ .

Theorem 1 below proves—for cases where the activation is admissible and anti-symmetric (e.g., it is linear, tanh or sine)—that as the width of the factorization increases, the generalization attained by G&C deteriorates, to the point of being no better than chance, i.e., no better than the generalization attained by randomly drawing a single weight setting from the prior distribution while disregarding the training data. In the limit of width tending to infinity, the theorem applies to any prior distribution generated by some regular distribution over  $\mathbb{R}$  (Definitions 2 and 3). If the regular distribution over  $\mathbb{R}$  is a zero-centered Gaussian, then the theorem also accounts for finite widths.

**Theorem 1.** Suppose the activation  $\sigma(\cdot)$  is admissible (Definition 4), and that it is anti-symmetric, meaning  $\sigma(-\alpha) = -\sigma(\alpha)$  for all  $\alpha \in \mathbb{R}$ . Let  $\mathcal{Q}(\cdot)$  be a regular probability distribution over  $\mathbb{R}$  (Definition 2), and let  $\mathcal{P}(\cdot)$  be the probability distribution over weight settings that is generated by  $\mathcal{Q}(\cdot)$  (Definition 3). Let  $\epsilon_{\text{train}}, \epsilon_{\text{gen}} \in \mathbb{R}_{>0}$ . Regard  $\mathcal{P}(\cdot)$  as a prior distribution, and consider the posterior distribution  $\mathcal{P}(\cdot | \mathcal{L}_{\text{train}}(W_1, \dots, W_d) < \epsilon_{\text{train}})$ , i.e., the distribution obtained from conditioning  $\mathcal{P}(\cdot)$  on the event that the training loss  $\mathcal{L}_{\text{train}}(\cdot)$  is smaller than  $\epsilon_{\text{train}}$ . Then, as the width  $k$  of the matrix factorization tends to infinity, the posterior probability of the event that the generalization loss  $\mathcal{L}_{\text{gen}}(\cdot)$  is smaller than  $\epsilon_{\text{gen}}$ , converges to its prior probability, i.e.:

$$\mathcal{P}(\mathcal{L}_{\text{gen}}(W_1, \dots, W_d) < \epsilon_{\text{gen}} | \mathcal{L}_{\text{train}}(W_1, \dots, W_d) < \epsilon_{\text{train}}) - \mathcal{P}(\mathcal{L}_{\text{gen}}(W_1, \dots, W_d) < \epsilon_{\text{gen}}) \xrightarrow[k \rightarrow \infty]{} 0.$$

Moreover, in the canonical case where  $\mathcal{Q}(\cdot)$  is a zero-centered Gaussian distribution, i.e.,  $\mathcal{Q}(\cdot) = \mathcal{N}(\cdot; 0, \nu)$  for some  $\nu \in \mathbb{R}_{>0}$ , it holds that for any  $k$ :<sup>2</sup>

$$\mathcal{P}(\mathcal{L}_{\text{gen}}(W_1, \dots, W_d) < \epsilon_{\text{gen}} | \mathcal{L}_{\text{train}}(W_1, \dots, W_d) < \epsilon_{\text{train}}) - \mathcal{P}(\mathcal{L}_{\text{gen}}(W_1, \dots, W_d) < \epsilon_{\text{gen}}) = O\left(\frac{1}{\sqrt{k}}\right).$$

*Proof sketch (full proof in Appendix A).* The proof begins by establishing an equivalence between a matrix factorization and a feedforward fully connected neural network: each column of a factorized matrix  $W$  (Equation (4)) can be seen as the output of a feedforward fully connected neural network when its input is a standard basis vector. This equivalence allows us to utilize the theoretical results of Hanin [38] and Favaro et al. [31], originally developed for feedforward fully connected neural networks of large widths.

The proof proceeds to treat the case where  $\mathcal{Q}(\cdot)$  is an arbitrary regular probability distribution (over  $\mathbb{R}$ ), and the width  $k$  tends to infinity. It is shown that there, the factorized matrix  $W$  converges in distribution to a random matrix  $W_{\text{iid}} \in \mathbb{R}^{m, m'}$  whose entries are independently drawn from a zero-centered Gaussian distribution. Since the measurement matrices  $(A_i)_{i=1}^n$  are orthogonal to the basis  $\mathcal{B}$  that defines the generalization loss (Equation (3)), the events  $\mathcal{L}_{\text{train}}(W_{\text{iid}}) < \epsilon_{\text{train}}$  and  $\mathcal{L}_{\text{gen}}(W_{\text{iid}}) < \epsilon_{\text{gen}}$  are statistically independent. Therefore, conditioning on the event that the training loss is lower than  $\epsilon_{\text{train}}$  does not change the probability of the event that the generalization loss is lower than  $\epsilon_{\text{gen}}$ .

Finally, the proof turns to the case where  $\mathcal{Q}(\cdot)$  is a zero-centered Gaussian distribution, and the width  $k$  is finite. For that, it is shown that the probabilities of the events  $\mathcal{L}_{\text{train}}(W) < \epsilon_{\text{train}}$  and  $\mathcal{L}_{\text{gen}}(W) <$

<sup>2</sup>The  $O$ -notation below hides constants that depend on  $\sigma(\cdot)$ ,  $\epsilon_{\text{train}}$ ,  $\epsilon_{\text{gen}}$  and  $\nu$ , as well as the ground truth matrix  $W^*$ , the measurement matrices  $(A_i)_{i=1}^n$ , the depth  $d$  and the dimensions  $m$  and  $m'$  of the matrix factorization. See Appendix A.3 for details.

275  $\epsilon_{\text{gen}}$  converge to those of the events  $\mathcal{L}_{\text{train}}(W_{\text{iid}}) < \epsilon_{\text{train}}$  and  $\mathcal{L}_{\text{gen}}(W_{\text{iid}}) < \epsilon_{\text{gen}}$ , respectively, at a  
 276 sufficiently fast rate.  $\square$

277 Theorem 3.3 from Soltanolkotabi et al. [92]—restated as Proposition 1 below—is a representative  
 278 result from the large body of work establishing that gradient descent attains good generalization [36,  
 279 62, 5, 66, 29, 111, 119, 63, 53, 115]. The result proves—for cases where the activation is linear, the  
 280 depth is two, and the measurement matrices satisfy an RIP (Definition 1)—that gradient descent  
 281 (with small step size and small Kaiming Gaussian initialization) attains good generalization, with  
 282 probability (over the initialization) tending to one as the width of the factorization increases. In light  
 283 of this result, Theorem 1 establishes cases where the generalization attainable by G&C is provably  
 284 inferior to that of gradient descent. To our knowledge, this is the first formal proof of the existence of  
 285 such cases.

286 **Proposition 1** (restatement of Theorem 3.3 from [92]). *There exists a universal constant  $c_1 \in \mathbb{R}_{>0}$   
 287 with which the following holds. Suppose the activation  $\sigma(\cdot)$  is linear (i.e.,  $\sigma(\alpha) = \alpha$  for all  $\alpha \in \mathbb{R}$ ),  
 288 and the depth  $d$  equals two. Let  $\mathcal{Q}(\cdot)$  be a zero-centered Gaussian probability distribution, i.e.,  
 289  $\mathcal{Q}(\cdot) = \mathcal{N}(\cdot; 0, \nu)$ , with variance  $\nu \in (0, O(k^{-27/2}))$ . Let  $\mathcal{P}(\cdot)$  be the probability distribution over  
 290 weight settings that is generated by  $\mathcal{Q}(\cdot)$  (Definition 3). Assume the measurement matrices  $(A_i)_{i=1}^n$   
 291 satisfy an RIP (Definition 1) of order  $2r + 1$  (recall that  $r$  is the rank of the ground truth matrix  $W^*$ )  
 292 with a constant  $\delta \in (0, \tilde{O}(1))$ . Consider minimization of the training loss  $\mathcal{L}_{\text{train}}(\cdot)$  via gradient  
 293 descent (Equation (7)) with initialization drawn from  $\mathcal{P}(\cdot)$  and step size  $\eta \in (0, \tilde{O}(1))$ . Then,  
 294 there exists some  $\tau \in \mathbb{N}$ ,  $\tau = \tilde{O}(\eta^{-1})$ , such that for any width  $k$  of the matrix factorization, after  
 295  $\tau$  iterations of gradient descent, with probability at least  $1 - O(e^{-c_1 k})$  over its initialization, the  
 296 generalization loss  $\mathcal{L}_{\text{gen}}(\cdot)$  is  $O(\nu^{3/10} k^{-3/20})$ .<sup>3</sup>*

### 297 4.3 Increasing Depth: No Need for Gradient Descent

298 In this subsection, we consider a regime where the depth of the matrix factorization increases, and  
 299 prove that gradient descent is not necessary for good generalization. In particular, Theorem 2 below  
 300 establishes cases where, as the depth of the factorization increases, the generalization attained by  
 301 G&C improves, to the point of being perfect. This stands in contrast to our analysis of increasing  
 302 width (Section 4.2), which established cases where the generalization attainable by G&C is provably  
 303 inferior to that of gradient descent.

304 The cases to which Theorem 2 applies are those where the activation is linear, the ground truth matrix  
 305 has norm and rank equal to one, the measurement matrices satisfy an RIP (Definition 1), and the prior  
 306 distribution is generated with normalization (Definition 3) from a zero-centered Gaussian distribution  
 307 (over  $\mathbb{R}$ ). The theorem is non-asymptotic, meaning it applies to finite depths, not only to the limit of  
 308 depth tending to infinity.

309 **Theorem 2.** *Suppose the ground truth matrix  $W^*$  satisfies  $\|W^*\|_F = 1$  and its rank  $r$  equals one.  
 310 Suppose the activation  $\sigma(\cdot)$  is linear (i.e.,  $\sigma(\alpha) = \alpha$  for all  $\alpha \in \mathbb{R}$ ). Assume the measurement  
 311 matrices  $(A_i)_{i=1}^n$  satisfy an RIP (Definition 1) of order two with some constant  $\delta \in (0, 1)$ . Let  $\mathcal{Q}(\cdot)$   
 312 be a zero-centered Gaussian probability distribution, i.e.,  $\mathcal{Q}(\cdot) = \mathcal{N}(\cdot; 0, \nu)$  for some  $\nu \in \mathbb{R}_{>0}$ . Let  
 313  $\mathcal{P}(\cdot)$  be the probability distribution over weight settings that is generated by  $\mathcal{Q}(\cdot)$  with normalization  
 314 (Definition 3). Then, there exists  $c \in \mathbb{R}_{>0}$  (dependent only on  $\delta$ ) such that, for any  $\epsilon_{\text{train}} \in \mathbb{R}_{>0}$  and  
 315 any depth  $d$  of the matrix factorization:<sup>4</sup>*

$$1 - \mathcal{P}(\mathcal{L}_{\text{gen}}(W_1, \dots, W_d) < \epsilon_{\text{train}} \mid \mathcal{L}_{\text{train}}(W_1, \dots, W_d) < \epsilon_{\text{train}}) = O\left(\frac{1}{d}\right).$$

316 *Proof sketch (full proof in Appendix B).* The proof begins by decomposing the factorized matrix  $W$   
 317 (Equation (4)) into a product of three matrices:  $W = W_d W_{d-1:2} W_1$ , where  $W_{d-1:2} := W_{d-1} \cdots W_2$ .  
 318 It then utilizes concentration bounds (established by Hanin and Paouris [39]) for the singular values  
 319 of a product of square random Gaussian matrices, to establish that for any  $\gamma \in \mathbb{R}_{>0}$ , the probability

<sup>3</sup>Throughout the statement of Proposition 1, the  $O$ - and  $\tilde{O}$ -notations hide constants that depend the dimensions  $m$  and  $m'$  of the matrix factorization, and on the ground truth matrix  $W^*$ . The  $\tilde{O}$ -notation also hides factors logarithmic in  $k$  and  $\nu$ . See Appendix E for details.

<sup>4</sup>The  $O$ -notation below hides constants that depend on the measurement matrices  $(A_i)_{i=1}^n$ , the ground truth matrix  $W^*$ , the dimensions  $m$  and  $m'$  of the matrix factorization, and the width  $k$  of the matrix factorization. See Appendix B for details.

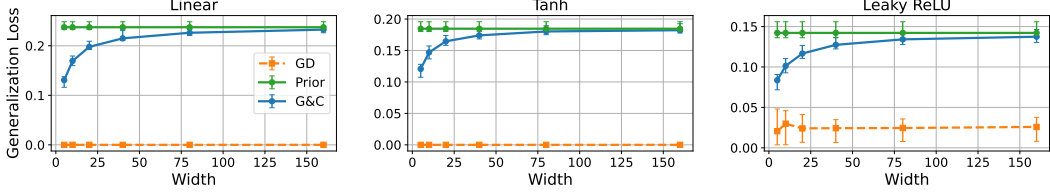

Figure 1: In line with our theory (Section 4.2), as the width of a matrix factorization increases, the generalization attained by G&C deteriorates, to the point of being no better than chance, *i.e.*, no better than the generalization attained by randomly drawing a single weight setting from the prior distribution while disregarding the training data. In contrast, gradient descent attains good generalization across all widths. Each of the above plots corresponds to a matrix factorization as described in Section 3.3, with a different activation  $\sigma(\cdot)$ : linear activation ( $\sigma(\alpha) = \alpha$ ) for the left plot; tanh activation ( $\sigma(\alpha) = \tanh(\alpha)$ ) for the middle plot; and Leaky ReLU activation ( $\sigma(\alpha) = \max\{c \cdot \alpha, \alpha\}$ , with  $c = 0.2$ ) for the right plot.<sup>5</sup> In each plot, the generalization loss (Equation (6)) is shown against the width of the matrix factorization, for three optimizers: gradient descent with small step size and small initialization (Section 3.4), G&C with a Kaiming Gaussian prior distribution (Section 3.5), and simply drawing a single weight setting from the prior distribution while disregarding the training data. For each combination of width and optimizer, we report the median (marker) and interquartile range (error bar) of generalization losses attained over eight trials (differing only in random seed). Across all experiments reported in this figure: the matrix factorization had depth two and dimensions  $m = m' = 5$ ; the ground truth matrix had (Frobenius) norm and rank equal to one; and the training data size was  $n = 15$ . We note that with Leaky ReLU activation, which lies beyond the scope of our theory, the generalization attained by gradient descent is not as good as it is with linear and tanh activations. For further implementation details and experiments see Appendices F and G, respectively.

that  $W_{d-1:2}$  is within  $\gamma$  (in Frobenius norm) of a rank one matrix is  $1 - \exp(-\Omega(d))$ . The proof then shows that this implies  $W$  is within  $\gamma$  of a rank one matrix with probability  $1 - O(1/d)$ . Utilizing the RIP and choosing  $\gamma$  appropriately, it is then proven that the probability of the events  $\mathcal{L}_{\text{train}}(W) < \epsilon_{\text{train}}$  and  $\mathcal{L}_{\text{gen}}(W) \geq \epsilon_{\text{train}}c$  occurring simultaneously is  $O(1/d)$ . Finally, it is shown that the probability of  $\mathcal{L}_{\text{train}}(W) < \epsilon_{\text{train}}$  is  $\Omega(1)$ , which in turn implies that the probability of  $\mathcal{L}_{\text{gen}}(W) \geq \epsilon_{\text{train}}c$  conditioned on  $\mathcal{L}_{\text{train}}(W) < \epsilon_{\text{train}}$  is  $O(1/d)$ . This is the sought-after result.  $\square$

## 5 Empirical Demonstration

In this section, we corroborate our theory by empirically demonstrating that in matrix factorization (Section 3.3), the generalization attained by G&C (Section 3.5) improves as depth increases but deteriorates as width increases, whereas gradient descent (Section 3.4) attains good generalization throughout. Figures 1 and 2 present such demonstrations, plotting generalization as a function of width and depth, respectively, for both G&C and gradient descent. The demonstrations in Figures 1 and 2 cover the theoretically analyzed linear and tanh activations, as well as the Leaky ReLU activation [67] which lies beyond the scope of our theory.<sup>5</sup> Additional demonstrations covering further cases (including gradient descent with momentum [79]) are provided in Appendix F. Code for reproducing all demonstrations will be made publicly available with the camera-ready version of the paper.

## 6 Limitations

It is important to acknowledge several limitations of our theory. First, while a large body of theoretical work [36, 62, 5, 66, 29, 111, 119, 63, 92, 53, 115] has been devoted to establishing that gradient descent attains good generalization in matrix factorization, Theorem 3.3 from [92] (restated as Proposition 1 herein)—which applies only when the activation is linear, the depth is two, and the measurement matrices satisfy an RIP (Definition 1)—is the only result at our disposal that formally guarantees low generalization loss with high probability for gradient descent with a positive (non-infinitesimal) step size and conventional (data-independent) initialization. Second, the guarantees we prove for G&C—namely, Theorems 1 and 2—include unspecified constant factors, and in particular,

<sup>5</sup>We attempted to include a demonstration with the more popular ReLU activation [45], but its tendency to zero out matrix entries rendered G&C computationally infeasible, as an excessive number of draws were required to obtain a weight setting that fits the training data.



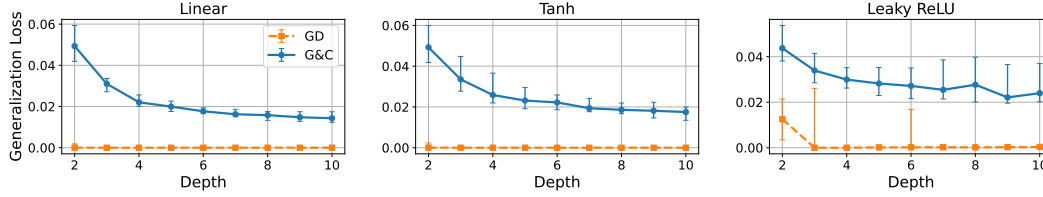

Figure 2: In line with our theory (Section 4.3), as the depth of a matrix factorization increases, the generalization attained by G&C improves, thereby approaching that attained by gradient descent. This figure adheres to the caption of Figure 1, except for the following differences: (i) generalization losses are shown against the depth (rather than the width) of the matrix factorization; (ii) only gradient descent and G&C were included in the experiments (the optimizer drawing a single weight setting from the prior distribution was excluded); (iii) the prior distribution of G&C included normalization (Definition 3); and (iv) the matrix factorization had variable (rather than fixed) depth and fixed (rather than variable) width, with the latter set to five. We did not include depths greater than ten in our experiments, as they led to excessively long run times for gradient descent (due to vanishing gradients). For further implementation details and experiments see Appendices F and G, respectively.

are non-vacuous only when the width or depth of the matrix factorization is sufficiently large. Third, Theorem 1 assumes that the activation is anti-symmetric. Fourth, Theorem 2 imposes even stronger assumptions: the activation is linear, the ground truth matrix has norm and rank equal to one, and the measurement matrices satisfy an RIP. Fifth, Theorem 1 requires the G&C training loss threshold  $\epsilon_{\text{train}}$  to be specified (the theorem does not rule out the possibility that for any width, a sufficiently small  $\epsilon_{\text{train}}$  will lead G&C to attain good generalization), and although Appendix C proves a result that allows unspecified  $\epsilon_{\text{train}}$ , it does so under stringent assumptions not imposed by Theorem 1. Finally, Theorems 1 and 2 consider different types of prior distributions: Theorem 1 excludes normalization (Definition 3), whereas Theorem 2 includes it. While we empirically demonstrate that the conclusions of our theory hold beyond its formal scope, the above limitations remain. We hope that this paper will serve as a stepping stone towards addressing these limitations, and more broadly, towards extending our theory from matrix factorization to real-world neural networks.

## 7 Conclusion

Conventional wisdom attributes the miraculous generalization abilities of neural networks to gradient descent. A recent bold argument claims that gradient descent is not necessary for neural networks to generalize well, and in fact, any reasonable optimizer can suffice. This is justified by the so-called volume hypothesis, which posits that among the weight settings that fit the training data, the volume of the weight settings that generalize well is much greater than the volume of the weight settings that do not. While several works have supported the volume hypothesis in certain cases involving wide and deep neural networks, the literature also includes contrasting evidence.

In this paper, we presented a theoretical study for matrix factorization (with linear and non-linear activation)—a common and important testbed in the theory of neural networks—to rigorously examine the validity of the volume hypothesis. Our first contribution is a proof that the volume hypothesis fails when the width of a network is large (compared to its depth), thereby establishing—for the first time, to the best of our knowledge—a case where gradient descent is provably necessary for a neural network to generalize well. As a second contribution, we proved that the volume hypothesis holds when the depth of a network is large (compared to its width). These contributions reveal a stark contrast between wide and deep networks, which we further validated through empirical demonstrations.

Overall, our findings suggest that even in simple settings, there may not be a simple answer to the question of whether neural networks need gradient descent to generalize well: the answer may hinge on subtle dependencies between network width and depth. We hope that our study of matrix factorization will serve as a stepping stone towards deriving a complete answer for real-world settings, thereby illuminating the role of gradient descent in modern AI.

## References

- [1] Madhu S Advani, Andrew M Saxe, and Haim Sompolinsky. High-dimensional dynamics of generalization error in neural networks. *Neural Networks*, 132:428–446, 2020.

- [2] Md Zahangir Alom, Tarek M. Taha, Christopher Yakopcic, Stefan Westberg, Paheding Sidike, Mst Shamima Nasrin, Brian C Van Esesn, Abdul A S. Awwal, and Vijayan K. Asari. The history began from alexnet: A comprehensive survey on deep learning approaches, 2018. URL <https://arxiv.org/abs/1803.01164>.
- [3] Sanjeev Arora, Nadav Cohen, and Elad Hazan. On the optimization of deep networks: Implicit acceleration by overparameterization. In Jennifer Dy and Andreas Krause, editors, *Proceedings of the 35th International Conference on Machine Learning*, volume 80 of *Proceedings of Machine Learning Research*, pages 244–253. PMLR, 10–15 Jul 2018. URL <https://proceedings.mlr.press/v80/arora18a.html>.
- [4] Sanjeev Arora, Nadav Cohen, Wei Hu, and Yuping Luo. Implicit regularization in deep matrix factorization. In H. Wallach, H. Larochelle, A. Beygelzimer, F. d’Alché-Buc, E. Fox, and R. Garnett, editors, *Advances in Neural Information Processing Systems*, volume 32. Curran Associates, Inc., 2019. URL [https://proceedings.neurips.cc/paper\\_files/paper/2019/file/c0c783b5fc0d7d808f1d14a6e9c8280d-Paper.pdf](https://proceedings.neurips.cc/paper_files/paper/2019/file/c0c783b5fc0d7d808f1d14a6e9c8280d-Paper.pdf).
- [5] Sanjeev Arora, Nadav Cohen, Wei Hu, and Yuping Luo. Implicit regularization in deep matrix factorization, 2019. URL <https://arxiv.org/abs/1905.13655>.
- [6] Shahar Azulay, Edward Moroshko, Mor Shpigel Nacson, Blake E Woodworth, Nathan Srebro, Amir Globerson, and Daniel Soudry. On the implicit bias of initialization shape: Beyond infinitesimal mirror descent. In *International Conference on Machine Learning*, pages 468–477. PMLR, 2021.
- [7] Jimmy Lei Ba, Jamie Ryan Kiros, and Geoffrey E. Hinton. Layer normalization, 2016. URL <https://arxiv.org/abs/1607.06450>.
- [8] Richard Baraniuk, Mark Davenport, Ronald DeVore, and Michael Wakin. A simple proof of the restricted isometry property for random matrices. *Constructive Approximation*, 28:253–263, 12 2008. doi: 10.1007/s00365-007-9003-x.
- [9] Peter L Bartlett, Philip M Long, Gábor Lugosi, and Alexander Tsigler. Benign overfitting in linear regression. *Proceedings of the National Academy of Sciences*, 117(48):30063–30070, 2020.
- [10] Mikhail Belkin, Daniel Hsu, Siyuan Ma, and Soumik Mandal. Reconciling modern machine-learning practice and the classical bias–variance trade-off. *Proceedings of the National Academy of Sciences*, 116(32):15849–15854, 2019.
- [11] Yakir Berchenko. Simplicity bias in overparameterized machine learning. In *Proceedings of the AAAI Conference on Artificial Intelligence*, volume 38, pages 11052–11060, 2024.
- [12] Srinadh Bhojanapalli, Behnam Neyshabur, and Nathan Srebro. Global optimality of local search for low rank matrix recovery, 2016. URL <https://arxiv.org/abs/1605.07221>.
- [13] Dennis D Boos. A converse to scheffe’s theorem. *The Annals of Statistics*, pages 423–427, 1985.
- [14] Amit Boyarski, Sanketh Vedula, and Alex Bronstein. Spectral geometric matrix completion, 2021. URL <https://arxiv.org/abs/1911.07255>.
- [15] Tom B. Brown, Benjamin Mann, Nick Ryder, Melanie Subbiah, Jared Kaplan, Prafulla Dhariwal, Arvind Neelakantan, Pranav Shyam, Girish Sastry, Amanda Askell, Sandhini Agarwal, Ariel Herbert-Voss, Gretchen Krueger, Tom Henighan, Rewon Child, Aditya Ramesh, Daniel M. Ziegler, Jeffrey Wu, Clemens Winter, Christopher Hesse, Mark Chen, Eric Sigler, Mateusz Litwin, Scott Gray, Benjamin Chess, Jack Clark, Christopher Berner, Sam McCandlish, Alec Radford, Ilya Sutskever, and Dario Amodei. Language models are few-shot learners, 2020. URL <https://arxiv.org/abs/2005.14165>.
- [16] Gon Buzaglo, Itamar Harel, Mor Shpigel Nacson, Alon Brutzkus, Nathan Srebro, and Daniel Soudry. How uniform random weights induce non-uniform bias: Typical interpolating neural networks generalize with narrow teachers. In *Forty-first International Conference on Machine Learning*, 2024.
- [17] Emmanuel J. Candes and Benjamin Recht. Exact matrix completion via convex optimization, 2008. URL <https://arxiv.org/abs/0805.4471>.
- [18] Richard Caron and Tim Traynor. The zero set of a polynomial. *WSMR Report*, pages 05–02, 2005.
- [19] Satrajit Chatterjee and Piotr Zielinski. On the generalization mystery in deep learning. *arXiv preprint arXiv:2203.10036*, 2022.

- 431 [20] Ping-yeh Chiang, Renkun Ni, David Yu Miller, Arpit Bansal, Jonas Geiping, Micah Goldblum, and Tom  
432 Goldstein. Loss landscapes are all you need: Neural network generalization can be explained without the  
433 implicit bias of gradient descent. In *The Eleventh International Conference on Learning Representations*,  
434 2023.
- 435 [21] Lenaic Chizat and Francis Bach. Implicit bias of gradient descent for wide two-layer neural networks  
436 trained with the logistic loss. In *Conference on learning theory*, pages 1305–1338. PMLR, 2020.
- 437 [22] Eungchun Cho. Inner product of random vectors. *International Journal of Pure and Applied Mathematics*,  
438 56(2):217–221, 2009.
- 439 [23] Hung-Hsu Chou, Carsten Gieshoff, Johannes Maly, and Holger Rahut. Gradient descent for deep matrix  
440 factorization: Dynamics and implicit bias towards low rank, 2023. URL [https://arxiv.org/abs/](https://arxiv.org/abs/2011.13772)  
441 2011.13772.
- 442 [24] Nadav Cohen and Noam Razin. Lecture notes on linear neural networks: A tale of optimization and  
443 generalization in deep learning, 2024. URL <https://arxiv.org/abs/2408.13767>.
- 444 [25] Alex Damian, Eshaan Nichani, and Jason D Lee. Self-stabilization: The implicit bias of gradient descent  
445 at the edge of stability. *arXiv preprint arXiv:2209.15594*, 2022.
- 446 [26] Philip J. Davis. Gamma function and related functions. In Milton Abramowitz and Irene A. Stegun, editors,  
447 *Handbook of Mathematical Functions with Formulas, Graphs, and Mathematical Tables*, chapter 6, page  
448 258. Dover Publications, New York, 1972.
- 449 [27] Giacomo De Palma, Bobak Kiani, and Seth Lloyd. Random deep neural networks are biased towards  
450 simple functions. *Advances in Neural Information Processing Systems*, 32, 2019.
- 451 [28] John Duchi. Lecture notes for theory of statistics (stats:300b), 2017. URL [https://web.stanford.](https://web.stanford.edu/class/stats300b/ScribeNotes/2017/lecture-02.pdf)  
452 [edu/class/stats300b/ScribeNotes/2017/lecture-02.pdf](https://web.stanford.edu/class/stats300b/ScribeNotes/2017/lecture-02.pdf). Accessed: 2025-01-21.
- 453 [29] Armin Eftekhari and Konstantinos C. Zygalakis. Implicit regularization in matrix sensing: A geometric  
454 view leads to stronger results. *arXiv preprint arXiv:2008.12091*, 2020.
- 455 [30] Ge Fan, Chaoyun Zhang, Junyang Chen, Paul Li, Yingjie Li, and Victor C. M. Leung. Improving rating  
456 prediction in multi-criteria recommender systems via a collective factor model. *IEEE Transactions on*  
457 *Network Science and Engineering*, 10(6):3633–3643, 2023. doi: 10.1109/TNSE.2023.3270910.
- 458 [31] Stefano Favaro, Boris Hanin, Domenico Marinucci, Ivan Nourdin, and Giovanni Peccati. Quantitative  
459 clts in deep neural networks. *Probability Theory and Related Fields*, pages 1–45, 2025.
- 460 [32] Bernard D. Flury. Acceptance–rejection sampling made easy. *SIAM Review*, 32(3):474–476, 1990.
- 461 [33] Rahul Garg. Gradient descent with sparsification: An iterative algorithm for sparse recovery with  
462 restricted isometry property. page 43, 06 2009. doi: 10.1145/1553374.1553417.
- 463 [34] Rong Ge, Chi Jin, and Yi Zheng. No spurious local minima in nonconvex low rank problems: A unified  
464 geometric analysis, 2017. URL <https://arxiv.org/abs/1704.00708>.
- 465 [35] Rong Ge, Jason D. Lee, and Tengyu Ma. Matrix completion has no spurious local minimum, 2018. URL  
466 <https://arxiv.org/abs/1605.07272>.
- 467 [36] Suriya Gunasekar, Blake Woodworth, Srinadh Bhojanapalli, Behnam Neyshabur, and Nathan Srebro.  
468 Implicit regularization in matrix factorization, 2017. URL <https://arxiv.org/abs/1705.09280>.
- 469 [37] Suriya Gunasekar, Jason D Lee, Daniel Soudry, and Nati Srebro. Implicit bias of gradient descent on  
470 linear convolutional networks. *Advances in neural information processing systems (NeurIPS)*, 31, 2018.
- 471 [38] Boris Hanin. Random neural networks in the infinite width limit as gaussian processes. *The Annals of*  
472 *Applied Probability*, 33(6A):4798–4819, 2023.
- 473 [39] Boris Hanin and Grigoris Paouris. Non-asymptotic results for singular values of gaussian matrix products.  
474 *Geometric and Functional Analysis*, 31(2):268–324, 2021.
- 475 [40] Boris Hanin and Alexander Zlokapa. Bayesian interpolation with deep linear networks. *Proceedings of*  
476 *the National Academy of Sciences*, 120(23):e2301345120, 2023.
- 477 [41] Itamar Harel, William M Hoza, Gal Vardi, Itay Evron, Nathan Srebro, and Daniel Soudry. Provable  
478 tempered overfitting of minimal nets and typical nets. *arXiv preprint arXiv:2410.19092*, 2024.

- [42] Haiyun He, Hanshu Yan, and Vincent YF Tan. Information-theoretic characterization of the generalization error for iterative semi-supervised learning. *Journal of Machine Learning Research*, 23(287):1–52, 2022.
- [43] Kaiming He, Xiangyu Zhang, Shaoqing Ren, and Jian Sun. Deep residual learning for image recognition, 2015. URL <https://arxiv.org/abs/1512.03385>.
- [44] Kaiming He, Xiangyu Zhang, Shaoqing Ren, and Jian Sun. Delving deep into rectifiers: Surpassing human-level performance on imagenet classification, 2015. URL <https://arxiv.org/abs/1502.01852>.
- [45] Alston S. Householder. A theory of steady-state activity in nerve-fiber networks: I. definitions and preliminary lemmas. *The Bulletin of Mathematical Biophysics*, 3(2):63–69, jun 1941.
- [46] Gao Huang, Zhuang Liu, Laurens van der Maaten, and Kilian Q. Weinberger. Densely connected convolutional networks, 2018. URL <https://arxiv.org/abs/1608.06993>.
- [47] Minyoung Huh, Hossein Mobahi, Richard Zhang, Brian Cheung, Pulkit Agrawal, and Phillip Isola. The low-rank simplicity bias in deep networks. *arXiv preprint arXiv:2103.10427*, 2021.
- [48] Sergey Ioffe and Christian Szegedy. Batch normalization: Accelerating deep network training by reducing internal covariate shift, 2015. URL <https://arxiv.org/abs/1502.03167>.
- [49] Pavel Izmailov, Sharad Vikram, Matthew D Hoffman, and Andrew Gordon Gordon Wilson. What are bayesian neural network posteriors really like? In *International conference on machine learning*, pages 4629–4640. PMLR, 2021.
- [50] Arthur Jacot, Franck Gabriel, and Clément Hongler. Neural tangent kernel: Convergence and generalization in neural networks. *Advances in neural information processing systems*, 31, 2018.
- [51] Ziwei Ji and Matus Telgarsky. Directional convergence and alignment in deep learning. *Advances in Neural Information Processing Systems*, 33:17176–17186, 2020.
- [52] Yiding Jiang, Behnam Neyshabur, Hossein Mobahi, Dilip Krishnan, and Samy Bengio. Fantastic generalization measures and where to find them. *arXiv preprint arXiv:1912.02178*, 2019.
- [53] Jikai Jin, Zhiyuan Li, Kaifeng Lyu, Simon Shaolei Du, and Jason D Lee. Understanding incremental learning of gradient descent: A fine-grained analysis of matrix sensing. In *International Conference on Machine Learning*, pages 15200–15238. PMLR, 2023.
- [54] Li Jing, Jure Zbontar, and Yann LeCun. Implicit rank-minimizing autoencoder, 2020. URL <https://arxiv.org/abs/2010.00679>.
- [55] Yiwen Kou, Zixiang Chen, and Quanquan Gu. Implicit bias of gradient descent for two-layer relu and leaky relu networks on nearly-orthogonal data. *Advances in Neural Information Processing Systems*, 36: 30167–30221, 2023.
- [56] Alex Krizhevsky, Ilya Sutskever, and Geoffrey E Hinton. Imagenet classification with deep convolutional neural networks. In F. Pereira, C.J. Burges, L. Bottou, and K.Q. Weinberger, editors, *Advances in Neural Information Processing Systems*, volume 25. Curran Associates, Inc., 2012. URL [https://proceedings.neurips.cc/paper\\_files/paper/2012/file/c399862d3b9d6b76c8436e924a68c45b-Paper.pdf](https://proceedings.neurips.cc/paper_files/paper/2012/file/c399862d3b9d6b76c8436e924a68c45b-Paper.pdf).
- [57] Andrew K Lampinen and Surya Ganguli. An analytic theory of generalization dynamics and transfer learning in deep linear networks. *arXiv preprint arXiv:1809.10374*, 2018.
- [58] Rafał Latała and Dariusz Matlak. Royen’s proof of the gaussian correlation inequality. In *Geometric Aspects of Functional Analysis: Israel Seminar (GAFA) 2014–2016*, pages 265–275. Springer, 2017.
- [59] Yann LeCun, Léon Bottou, Geneviève B. Orr, and Klaus-Robert Müller. Efficient backprop. In *Neural Networks: Tricks of the Trade*, pages 9–50. Springer, 1998.
- [60] Binghui Li, Zhixuan Pan, Kaifeng Lyu, and Jian Li. Feature averaging: An implicit bias of gradient descent leading to non-robustness in neural networks. *arXiv preprint arXiv:2410.10322*, 2024.
- [61] Yi Li and David P Woodruff. The product of gaussian matrices is close to gaussian. *arXiv preprint arXiv:2108.09887*, 2021.
- [62] Yuanzhi Li, Tengyu Ma, and Hongyang Zhang. Algorithmic regularization in over-parameterized matrix sensing and neural networks with quadratic activations. In *Conference On Learning Theory*, pages 2–47. PMLR, 2018.

- [63] Zhiyuan Li, Yuping Luo, and Kaifeng Lyu. Towards resolving the implicit bias of gradient descent for matrix factorization: Greedy low-rank learning, 2021. URL <https://arxiv.org/abs/2012.09839>.
- [64] Kaifeng Lyu and Jian Li. Gradient descent maximizes the margin of homogeneous neural networks. *arXiv preprint arXiv:1906.05890*, 2019.
- [65] Kaifeng Lyu, Zhiyuan Li, Runzhe Wang, and Sanjeev Arora. Gradient descent on two-layer nets: Margin maximization and simplicity bias. *Advances in Neural Information Processing Systems*, 34:12978–12991, 2021.
- [66] Cong Ma, Kaizheng Wang, Yuejie Chi, and Yuxin Chen. Implicit regularization in nonconvex statistical estimation: Gradient descent converges linearly for phase retrieval, matrix completion, and blind deconvolution. *Foundations of Computational Mathematics*, 20(3):451–632, August 2019. ISSN 1615-3383. doi: 10.1007/s10208-019-09429-9. URL <http://dx.doi.org/10.1007/s10208-019-09429-9>.
- [67] Andrew L. Maas, Awni Y. Hannun, and Andrew Y. Ng. Rectifier nonlinearities improve neural network acoustic models. In *Proceedings of the 30th International Conference on Machine Learning*, 2013.
- [68] Eran Malach and Shai Shalev-Shwartz. Is deeper better only when shallow is good? *Advances in Neural Information Processing Systems*, 32, 2019.
- [69] Pierre Marion, Yu-Han Wu, Michael E Sander, and Gérard Biau. Implicit regularization of deep residual networks towards neural odes. *arXiv preprint arXiv:2309.01213*, 2023.
- [70] Hancheng Min, Salma Tarmoun, René Vidal, and Enrique Mallada. On the explicit role of initialization on the convergence and implicit bias of overparametrized linear networks. In *International Conference on Machine Learning*, pages 7760–7768. PMLR, 2021.
- [71] Chris Mingard, Joar Skalse, Guillermo Valle-Pérez, David Martínez-Rubio, Vladimir Mikulik, and Ard A Louis. Neural networks are a priori biased towards boolean functions with low entropy. *arXiv preprint arXiv:1909.11522*, 2019.
- [72] Vinod Nair and Geoffrey E. Hinton. Rectified linear units improve restricted boltzmann machines. In *Proceedings of the 27th International Conference on Machine Learning (ICML-10)*, pages 807–814, 2010.
- [73] Preetum Nakkiran, Gal Kaplun, Yamini Bansal, Tristan Yang, Boaz Barak, and Ilya Sutskever. Deep double descent: Where bigger models and more data hurt, 2019. URL <https://arxiv.org/abs/1912.02292>.
- [74] Preetum Nakkiran, Gal Kaplun, Yamini Bansal, Tristan Yang, Boaz Barak, and Ilya Sutskever. Deep double descent: Where bigger models and more data hurt. *Journal of Statistical Mechanics: Theory and Experiment*, 2021(12):124003, 2021.
- [75] Behnam Neyshabur. Implicit regularization in deep learning, 2017. URL <https://arxiv.org/abs/1709.01953>.
- [76] Behnam Neyshabur, Ryota Tomioka, and Nathan Srebro. In search of the real inductive bias: On the role of implicit regularization in deep learning. *arXiv preprint arXiv:1412.6614*, 2014.
- [77] Amit Peleg and Matthias Hein. Bias of stochastic gradient descent or the architecture: disentangling the effects of overparameterization of neural networks. In *Forty-first International Conference on Machine Learning*, 2024.
- [78] Alethea Power, Yuri Burda, Harri Edwards, Igor Babuschkin, and Vedant Misra. Grokking: Generalization beyond overfitting on small algorithmic datasets, 2022. URL <https://arxiv.org/abs/2201.02177>.
- [79] Ning Qian. On the momentum term in gradient descent learning algorithms. *Neural Networks*, 12(1): 145–151, 1999.
- [80] Lianke Qin, Zhao Song, and Ruizhe Zhang. A general algorithm for solving rank-one matrix sensing, 2023. URL <https://arxiv.org/abs/2303.12298>.
- [81] Adityanarayanan Radhakrishnan, George Stefanakis, Mikhail Belkin, and Caroline Uhler. Simple, fast, and flexible framework for matrix completion with infinite width neural networks. *Proceedings of the National Academy of Sciences*, 119(16):e2115064119, 2022.
- [82] Hrithik Ravi, Clay Scott, Daniel Soudry, and Yutong Wang. The implicit bias of gradient descent on separable multiclass data. *Advances in Neural Information Processing Systems*, 37:81324–81359, 2024.

[83] Noam Razin, Asaf Maman, and Nadav Cohen. Implicit regularization in tensor factorization, 2021. URL <https://arxiv.org/abs/2102.09972>.

[84] Noam Razin, Asaf Maman, and Nadav Cohen. Implicit regularization in hierarchical tensor factorization and deep convolutional neural networks. In Kamalika Chaudhuri, Stefanie Jegelka, Le Song, Csaba Szepesvari, Gang Niu, and Sivan Sabato, editors, *Proceedings of the 39th International Conference on Machine Learning*, volume 162 of *Proceedings of Machine Learning Research*, pages 18422–18462. PMLR, 17–23 Jul 2022. URL <https://proceedings.mlr.press/v162/razin22a.html>.

[85] Jason D. M. Rennie. Jacobian of the singular value decomposition with application to the trace norm distribution. <http://people.csail.mit.edu/jrennie/writing>, February 2006.

[86] Christian P. Robert and George Casella. *Monte Carlo Statistical Methods*. Springer Texts in Statistics. Springer, New York, 2 edition, 2004.

[87] Chris Rohlf. Generalization in neural networks: A broad survey. *Neurocomputing*, 611:128701, 2025.

[88] David E. Rumelhart, Geoffrey E. Hinton, and Ronald J. Williams. Learning representations by back-propagating errors. *Nature*, 323:533–536, 1986.

[89] Tim Salimans and Diederik P. Kingma. Weight normalization: A simple reparameterization to accelerate training of deep neural networks, 2016. URL <https://arxiv.org/abs/1602.07868>.

[90] Andrew M Saxe, James L McClelland, and Surya Ganguli. Exact solutions to the nonlinear dynamics of learning in deep linear neural networks. *arXiv preprint arXiv:1312.6120*, 2013.

[91] Rylan Schaeffer, Mikail Khona, Zachary Robertson, Akhilan Boopathy, Kateryna Pistunova, Jason W Rocks, Ila Rani Fiete, and Oluwasanmi Koyejo. Double descent demystified: Identifying, interpreting & ablating the sources of a deep learning puzzle. *arXiv preprint arXiv:2303.14151*, 2023.

[92] Mahdi Soltanolkotabi, Dominik Stöger, and Changzhi Xie. Implicit balancing and regularization: Generalization and convergence guarantees for overparameterized asymmetric matrix sensing. In *The Thirty Sixth Annual Conference on Learning Theory*, pages 5140–5142. PMLR, 2023.

[93] Daniel Soudry, Elad Hoffer, Mor Shpigel Nacson, Suriya Gunasekar, and Nathan Srebro. The implicit bias of gradient descent on separable data. *Journal of Machine Learning Research*, 19(70):1–57, 2018.

[94] Ruoyu Sun and Zhi-Quan Luo. Guaranteed matrix completion via non-convex factorization. *IEEE Transactions on Information Theory*, 62(11):6535–6579, November 2016. ISSN 1557-9654. doi: 10.1109/tit.2016.2598574. URL <http://dx.doi.org/10.1109/TIT.2016.2598574>.

[95] Shih-Yu Sun, Vimal Thilak, Etai Littwin, Omid Saremi, and Joshua M. Susskind. Implicit greedy rank learning in autoencoders via overparameterized linear networks, 2021. URL <https://arxiv.org/abs/2107.01301>.

[96] Mingxing Tan and Quoc Le. Efficientnet: Rethinking model scaling for convolutional neural networks. In *International conference on machine learning*, pages 6105–6114. PMLR, 2019.

[97] Mingxing Tan and Quoc V. Le. Efficientnet: Rethinking model scaling for convolutional neural networks, 2020. URL <https://arxiv.org/abs/1905.11946>.

[98] Ryan Theisen, Jason Klusowski, and Michael Mahoney. Good classifiers are abundant in the interpolating regime. In *International Conference on Artificial Intelligence and Statistics*, pages 3376–3384. PMLR, 2021.

[99] Joel A. Tropp and Anna C. Gilbert. Signal recovery from random measurements via orthogonal matching pursuit. *IEEE Transactions on Information Theory*, 53(12):4655–4666, 2007. doi: 10.1109/TIT.2007.909108.

[100] Stephen Tu, Ross Boczar, Max Simchowitz, Mahdi Soltanolkotabi, and Benjamin Recht. Low-rank solutions of linear matrix equations via procrustes flow, 2016. URL <https://arxiv.org/abs/1507.03566>.

[101] Dmitry Ulyanov, Andrea Vedaldi, and Victor Lempitsky. Instance normalization: The missing ingredient for fast stylization, 2017. URL <https://arxiv.org/abs/1607.08022>.

[102] Guillermo Valle-Pérez, Ard A Louis, and Chico Q Camargo. Deep learning generalizes because the parameter-function map is biased towards simple functions. In *7th International Conference on Learning Representations, ICLR 2019*, 2019.

- [103] Ashish Vaswani, Noam Shazeer, Niki Parmar, Jakob Uszkoreit, Llion Jones, Aidan N. Gomez, Lukasz Kaiser, and Illia Polosukhin. Attention is all you need, 2023. URL <https://arxiv.org/abs/1706.03762>.
- [104] Roman Vershynin. *High-Dimensional Probability: An Introduction with Applications in Data Science*, chapter Example 1.1. Cambridge University Press, Cambridge, 1 edition, 2018.
- [105] Roman Vershynin. *High-Dimensional Probability: An Introduction with Applications in Data Science*, chapter Exercise 4.50. Cambridge University Press, Cambridge, 2 edition, May 2025.
- [106] Roman Vershynin. *High-Dimensional Probability: An Introduction with Applications in Data Science*, chapter Lemma 3.4. Cambridge University Press, Cambridge, 2 edition, May 2025.
- [107] Zheng Wang, Geyong Min, and Wenjie Ruan. The implicit bias of gradient descent toward collaboration between layers: A dynamic analysis of multilayer perceptions. *Advances in Neural Information Processing Systems*, 37:74868–74898, 2024.
- [108] Andrew G Wilson and Pavel Izmailov. Bayesian deep learning and a probabilistic perspective of generalization. *Advances in neural information processing systems*, 33:4697–4708, 2020.
- [109] Johan S Wind, Vegard Antun, and Anders C Hansen. Implicit regularization in ai meets generalized hardness of approximation in optimization—sharp results for diagonal linear networks. *arXiv preprint arXiv:2307.07410*, 2023.
- [110] Blake Woodworth, Suriya Gunasekar, Jason D Lee, Edward Moroshko, Pedro Savarese, Itay Golan, Daniel Soudry, and Nathan Srebro. Kernel and rich regimes in overparametrized models. In *Conference on Learning Theory*, pages 3635–3673. PMLR, 2020.
- [111] Fan Wu and Patrick Rebeschini. Implicit regularization in matrix sensing via mirror descent, 2021. URL <https://arxiv.org/abs/2105.13831>.
- [112] Jingfeng Wu, Vladimir Braverman, and Jason D Lee. Implicit bias of gradient descent for logistic regression at the edge of stability. *Advances in Neural Information Processing Systems*, 36:74229–74256, 2023.
- [113] Yuxin Wu and Kaiming He. Group normalization, 2018. URL <https://arxiv.org/abs/1803.08494>.
- [114] Saining Xie, Ross Girshick, Piotr Dollár, Zhuowen Tu, and Kaiming He. Aggregated residual transformations for deep neural networks, 2017. URL <https://arxiv.org/abs/1611.05431>.
- [115] Yang Xu, Yihong Gu, and Cong Fang. The implicit bias of heterogeneity towards invariance: A study of multi-environment matrix sensing. *arXiv preprint arXiv:2403.01420*, 2024.
- [116] Chulhee Yun, Shankar Krishnan, and Hossein Mobahi. A unifying view on implicit bias in training linear neural networks. *arXiv preprint arXiv:2010.02501*, 2020.
- [117] Chiyuan Zhang, Samy Bengio, Moritz Hardt, Benjamin Recht, and Oriol Vinyals. Understanding deep learning requires rethinking generalization. *arXiv preprint arXiv:1611.03530*, 2016.
- [118] Chiyuan Zhang, Samy Bengio, Moritz Hardt, Benjamin Recht, and Oriol Vinyals. Understanding deep learning (still) requires rethinking generalization. *Communications of the ACM*, 64(3):107–115, 2021.
- [119] Jialun Zhang, Salar Fattahi, and Richard Y Zhang. Preconditioned gradient descent for over-parameterized nonconvex matrix factorization. *Advances in Neural Information Processing Systems*, 34:5985–5996, 2021.
- [120] Qinqing Zheng and John Lafferty. Convergence analysis for rectangular matrix completion using burer-monteiro factorization and gradient descent, 2016. URL <https://arxiv.org/abs/1605.07051>.
- [121] Gordan Zitkovic. Lecture 8: Characteristic functions. Lecture notes for the course Theory of Probability I, Department of Mathematics, University of Texas at Austin, 2013. Corollary 8.5.
- [122] Emmanuel Candes and Benjamin Recht. Exact matrix completion via convex optimization. *Communications of the ACM*, 55(6):111–119, 2012.
- [123] Emmanuel J Candes and Terence Tao. The power of convex relaxation: Near-optimal matrix completion. *IEEE transactions on information theory*, 56(5):2053–2080, 2010.
- [124] Jafar Jafarov. Survey of matrix completion algorithms. *arXiv preprint arXiv:2204.01532*, 2022.

- 676 [125] Charles R Johnson. Matrix completion problems. In *Proceedings of Symposia in Applied Mathematics*,  
677 volume 40, pages 87–169, 1990.
- 678 [126] A Paszke. Pytorch: An imperative style, high-performance deep learning library. *arXiv preprint*  
679 *arXiv:1912.01703*, 2019.
- 680 [127] Benjamin Recht. A simpler approach to matrix completion. *Journal of Machine Learning Research*, 12  
681 (12), 2011.
- 682 [128] Olivier Roy and Martin Vetterli. The effective rank: A measure of effective dimensionality. In *2007 15th*  
683 *European signal processing conference*, pages 606–610. IEEE, 2007.
- 684 [129] Ruoyu Sun and Zhi-Quan Luo. Guaranteed matrix completion via non-convex factorization. *IEEE*  
685 *Transactions on Information Theory*, 62(11):6535–6579, 2016.



## A Proof of Theorem 1

This appendix proves Theorem 1. Appendix A.1 establishes an equivalence between a matrix factorization and a feedforward fully connected neural network. This equivalence allows us to utilize the theoretical results of Hanin [38] and Favaro et al. [31], developed for feedforward fully connected neural networks of large widths. Relying on these results: Appendix A.2 treats the case where  $\mathcal{Q}(\cdot)$  is an arbitrary regular probability distribution and the width  $k$  tends to infinity; and Appendix A.3 treats the case where  $\mathcal{Q}(\cdot)$  is a zero-centered Gaussian distribution and the width  $k$  is finite.

### A.1 An Equivalence Between Matrix Factorizations and Fully Connected Neural Networks

We begin by defining the concept of a fully connected neural network.

**Definition 5.** A *fully connected neural network* of depth  $d \in \mathbb{N}$  with input dimension  $m' \in \mathbb{N}$ , output dimension  $m \in \mathbb{N}$ , hidden dimension  $k \in \mathbb{N}$  and activation function  $\sigma(\cdot)$  is a function  $\mathbf{x}_\alpha \in \mathbb{R}^{m'} \mapsto \mathbf{z}_\alpha^{(d)} \in \mathbb{R}^m$  of the following recursive form:

$$\mathbf{z}_\alpha^{(j)} = \begin{cases} W_1 \mathbf{x}_\alpha, & j = 1 \\ W_j \sigma(\mathbf{z}_\alpha^{(j-1)}), & j = 2, \dots, d \end{cases},$$

where  $W_1 \in \mathbb{R}^{k, m'}$ ,  $W_d \in \mathbb{R}^{m, k}$  and  $W_2, \dots, W_d \in \mathbb{R}^{k, k}$  are the networks weights, and  $\sigma$  applied to a vector is shorthand for  $\sigma$  applied to each entry.

Next, we prove a useful equivalence which shows that when a matrix factorization and a fully connected neural network share their weights and activation function, each of the columns of the former are equal to the outputs of the latter when input the appropriate standard basis vectors.

**Lemma 1.** Let  $\alpha \in [m']$ . For any weight matrices  $W_1, \dots, W_d$  and activation function  $\sigma(\cdot)$ , the  $\alpha$  column of the matrix factorization  $W$  (Equation (4)) produced by the weight settings  $(W_1, \dots, W_d)$  and the activation function  $\sigma(\cdot)$ , is equal to the output of the fully connected neural network (Definition 5) produced by the weights  $(W_1, \dots, W_d)$  and the activation function  $\sigma(\cdot)$ , when the input is  $\mathbf{e}_\alpha \in \mathbb{R}^{m'}$ , the standard basis vector holding 1 in its  $\alpha$  coordinate and zeros in the rest. Formally, we denote this as

$$[W]_{\cdot, \alpha} = \mathbf{z}_\alpha^{(d)},$$

where  $[W]_{\cdot, \alpha}$  is the  $\alpha$  column of  $W$  and  $\mathbf{z}_\alpha^{(d)}$  is the output of the fully connected neural network when the input is  $\mathbf{e}_\alpha \in \mathbb{R}^{m'}$ .

*Proof.* We prove the claim via induction on  $d$ . First, for the base case, it trivially holds that

$$[W_{1:1}]_{\cdot, \alpha} = W_{1:1} \mathbf{e}_\alpha = \mathbf{z}_\alpha^{(1)}.$$

Next, fix  $j \in [d]$  and assume that  $[W_{1:j}]_{\cdot, \alpha} = \mathbf{z}_\alpha^{(j)}$ . We thus have that

$$\begin{aligned} [W_{1:j+1}]_{\cdot, \alpha} &= W_{1:j+1} \mathbf{e}_\alpha \\ &= W_{j+1} \sigma(W_{1:j} \mathbf{e}_\alpha) \\ &= W_{j+1} \sigma(W_{1:j} \mathbf{e}_\alpha) \\ &= W_{j+1} \sigma([W_{1:j}]_{\cdot, \alpha}) \\ &= W_{j+1} \sigma(\mathbf{z}_\alpha^{(j)}) \\ &= \mathbf{z}_\alpha^{(j+1)}, \end{aligned}$$

where the third equality is due to Lemma 21, and the fourth equality is due to the inductive assumption. With this we complete the proof.  $\square$

### A.2 Proof for Arbitrary Regular Distribution and Infinite Width

The outline of the proof for the arbitrary prior case is as follows; Appendix A.2.1 presents Theorem 3, of which the arbitrary prior case of Theorem 1 is a special case. Appendix A.2.2 provides a useful Lemma used in the proof of Theorem 3. Appendix A.2.3 adapts a result from Hanin [38] showing that an infinitely wide matrix factorization converges in distribution to a centered Gaussian matrix (Definition 8). Finally, Appendix A.2.4 applies tools from probability theory to show that the latter convergence implies the conditions required for Lemma 2 in Appendix A.2.2.

### A.2.1 Restatement of the Arbitrary Prior Case of Theorem 1

The arbitrary prior case of Theorem 1 follows from Theorem 3, which allows for the distribution  $\mathcal{Q}(\cdot)$  and the activation  $\sigma(\cdot)$  to be slightly more general. Theorem 3 is presented below; afterwards, we demonstrate how it implies the arbitrary prior case of Theorem 1.

**Theorem 3.** *Let  $d \in \mathbb{N}$  be a fixed depth. Let  $\mathcal{Q}(\cdot)$  be some probability distribution on  $\mathbb{R}$  which satisfies*

$$\mathbb{E}_{x \sim \mathcal{Q}(\cdot)}[x] = 0, \quad \mathbb{E}_{x \sim \mathcal{Q}(\cdot)}[x^2] = 1,$$

*has finite higher moments and is symmetric, i.e., if  $x \sim \mathcal{Q}(\cdot)$  then  $-x \sim \mathcal{Q}(\cdot)$ . Let  $\sigma(\cdot)$  be an activation function that is not constant and antisymmetric, i.e.,*

$$\forall x \in \mathbb{R}. \sigma(x) = -\sigma(-x),$$

*furthermore suppose that  $\sigma$  is absolutely continuous, and that its almost-everywhere defined derivative is polynomially bounded, i.e:*

$$\exists p > 0 \text{ s.t. } \forall x \in \mathbb{R} \quad \left\| \frac{\sigma'(x)}{1 + |x|^p} \right\|_{L^\infty(\mathbb{R})} < \infty.$$

*Suppose also that*

$$\mathbb{E}_{x \sim \mathcal{Q}(\cdot)}[\sigma^2(x)] > 0.$$

*Let  $\epsilon_{\text{gen}}, \epsilon_{\text{train}}, c_W > 0$ . Suppose that for any  $j \in [d]$ , the entries of  $W_j \in \mathbb{R}^{m_{j+1}, m_j}$  are drawn independently by first sampling  $x \sim \mathcal{Q}(\cdot)$  and then setting  $[W_j]_{rs} = \sqrt{\frac{c_W}{m_j}} x$ . Then the matrix factorization  $W$  satisfies*

$$\lim_{k \rightarrow \infty} \mathcal{P}(\mathcal{L}_{\text{gen}}(W) < \epsilon_{\text{gen}} \mid \mathcal{L}_{\text{train}}(W) < \epsilon_{\text{train}}) = \lim_{k \rightarrow \infty} \mathcal{P}(\mathcal{L}_{\text{gen}}(W) < \epsilon_{\text{gen}}).$$

Let  $\mathcal{Q}(\cdot)$  be a regular distribution over  $\mathbb{R}$  (Definition 2), and let  $\sigma(\cdot)$  be an admissible activation function (Definition 4) that is antisymmetric. First, observe that since Theorem 3 allows for arbitrary  $c_W > 0$ , the condition for  $\mathbb{E}_{x \sim \mathcal{Q}(\cdot)}[x^2] = 1$  is satisfied with  $c_W = \mathbb{E}_{x \sim \mathcal{Q}(\cdot)}[x^2]$ . Next, note that since  $\mathcal{Q}(\cdot)$  assigns a positive probability to every neighborhood of the origin and has finite higher moments, and since  $\sigma(\cdot)$  does not vanish on both sides of the origin, it must hold that

$$\mathbb{E}_{x \sim \mathcal{Q}(\cdot)}[\sigma^2(x)] > 0.$$

The rest of the conditions in Theorem 3 are directly fulfilled by the properties of regular distributions (Definition 2) and the properties of admissible activation functions (Definition 4) that are antisymmetric. Overall we showed that Theorem 3 applies for  $\mathcal{Q}(\cdot)$  and  $\sigma(\cdot)$ , and so the arbitrary prior case of Theorem 1 will follow from Theorem 1.

### A.2.2 Sufficient Condition for Theorem 3

A useful Lemma used in the proof of Theorem 3 is provided below. The Lemma shows that for an infinitely wide matrix factorization (Equation (4)) with probabilities for low training loss and low generalization loss equal to that of a centered Gaussian matrix (Definition 8), the probability for having low generalization loss (Equation (3)) conditioned on having low training loss (Equation (2)) is equal to the probability of having low generalization loss.

**Lemma 2.** *Let  $\epsilon_{\text{gen}}, \epsilon_{\text{train}} > 0$ . Let  $W_{\text{iid}} \in \mathbb{R}^{m, m'}$  be a centered Gaussian matrix (Definition 8). Suppose that as  $k \rightarrow 0$ , the quantities*

$$|\mathcal{P}(\mathcal{L}_{\text{train}}(W) < \epsilon_{\text{train}}, \mathcal{L}_{\text{gen}}(W) < \epsilon_{\text{gen}}) - \mathcal{P}(\mathcal{L}_{\text{train}}(W_{\text{iid}}) < \epsilon_{\text{train}}, \mathcal{L}_{\text{gen}}(W_{\text{iid}}) < \epsilon_{\text{gen}})|,$$

$$|\mathcal{P}(\mathcal{L}_{\text{train}}(W) < \epsilon_{\text{train}}) - \mathcal{P}(\mathcal{L}_{\text{train}}(W_{\text{iid}}) < \epsilon_{\text{train}})|,$$

*and*

$$|\mathcal{P}(\mathcal{L}_{\text{gen}}(W) < \epsilon_{\text{gen}}) - \mathcal{P}(\mathcal{L}_{\text{gen}}(W_{\text{iid}}) < \epsilon_{\text{gen}})|$$

*all tend to 0. Then*

$$\lim_{k \rightarrow \infty} \mathcal{P}(\mathcal{L}_{\text{gen}}(W) < \epsilon_{\text{gen}} \mid \mathcal{L}_{\text{train}}(W) < \epsilon_{\text{train}}) = \lim_{k \rightarrow \infty} \mathcal{P}(\mathcal{L}_{\text{gen}}(W) < \epsilon_{\text{gen}}).$$

756 *Proof.* By the definition of the conditional probability

$$\mathcal{P} \left( \mathcal{L}_{\text{gen}}(W) < \epsilon_{\text{gen}} \middle| \mathcal{L}_{\text{train}}(W) < \epsilon_{\text{train}} \right) = \frac{\mathcal{P}(\mathcal{L}_{\text{train}}(W) < \epsilon_{\text{train}}, \mathcal{L}_{\text{gen}}(W) < \epsilon_{\text{gen}})}{\mathcal{P}(\mathcal{L}_{\text{train}}(W) < \epsilon_{\text{train}})}.$$

757 Observe that  $\mathcal{P}(\mathcal{L}_{\text{train}}(W_{\text{iid}}) < \epsilon_{\text{train}}) > 0$  does not depend on  $k$ . Therefore, we have that

$$\begin{aligned} \lim_{k \rightarrow \infty} \mathcal{P} \left( \mathcal{L}_{\text{gen}}(W) < \epsilon_{\text{gen}} \middle| \mathcal{L}_{\text{train}}(W) < \epsilon_{\text{train}} \right) &= \frac{\lim_{k \rightarrow \infty} \mathcal{P}(\mathcal{L}_{\text{train}}(W) < \epsilon_{\text{train}}, \mathcal{L}_{\text{gen}}(W) < \epsilon_{\text{gen}})}{\lim_{k \rightarrow \infty} \mathcal{P}(\mathcal{L}_{\text{train}}(W) < \epsilon_{\text{train}})} \\ &= \frac{\mathcal{P}(\mathcal{L}_{\text{train}}(W_{\text{iid}}) < \epsilon_{\text{train}}, \mathcal{L}_{\text{gen}}(W_{\text{iid}}) < \epsilon_{\text{gen}})}{\mathcal{P}(\mathcal{L}_{\text{train}}(W_{\text{iid}}) < \epsilon_{\text{train}})} \\ &= \mathcal{P} \left( \mathcal{L}_{\text{gen}}(W_{\text{iid}}) < \epsilon_{\text{gen}} \middle| \mathcal{L}_{\text{train}}(W_{\text{iid}}) < \epsilon_{\text{train}} \right) \\ &= \mathcal{P}(\mathcal{L}_{\text{gen}}(W_{\text{iid}}) < \epsilon_{\text{gen}}) \\ &= \lim_{k \rightarrow \infty} \mathcal{P}(\mathcal{L}_{\text{gen}}(W) < \epsilon_{\text{gen}}). \end{aligned}$$

758 In the penultimate transition we have used the fact that the measurement matrices  $A$  in  $\mathcal{B}$  are  
759 orthogonal to  $A_1, \dots, A_n$  and thus

$$\begin{aligned} &\mathcal{P} \left( \mathcal{L}_{\text{gen}}(W_{\text{iid}}) < \epsilon_{\text{gen}} \middle| \mathcal{L}_{\text{train}}(W_{\text{iid}}) < \epsilon_{\text{train}} \right) \\ &= \mathcal{P} \left( \frac{1}{|\mathcal{B}|} \sum_{A \in \mathcal{B}} (\langle A, W_{\text{iid}} \rangle - \langle A, W^* \rangle)^2 < \epsilon_{\text{gen}} \middle| \frac{1}{n} \sum_{i=1}^n (\langle A_i, W_{\text{iid}} \rangle - y_i)^2 < \epsilon_{\text{train}} \right) \\ &= \mathcal{P} \left( \frac{1}{|\mathcal{B}|} \sum_{A \in \mathcal{B}} (\langle A, W_{\text{iid}} \rangle - \langle A, W^* \rangle)^2 < \epsilon_{\text{gen}} \right) \\ &= \mathcal{P}(\mathcal{L}_{\text{gen}}(W_{\text{iid}}) < \epsilon_{\text{gen}}), \end{aligned}$$

760 where the second equality stems from the fact that for any fixed vectors  $v_1, \dots, v_r$  which are  
761 orthogonal (each of the flattened matrices  $A_1, \dots, A_n$  and the flattened  $A$ ), and a vector of indepen-  
762 dent identically distributed zero-centered Gaussian variables  $X$  (the flattened  $W_{\text{iid}}$ ), the variables  
763  $\{\langle X, v_i \rangle\}_{1 \leq i \leq r}$  are independent.  $\square$

### 764 A.2.3 Convergence in Distribution to a Centered Gaussian Matrix

765 In this section we prove that in the limit of infinite width, the matrix factorization converges in  
766 distribution to a centered Gaussian matrix (Definition 8). Key to the proof is the main result of  
767 Hanin [38] which characterizes the convergence of infinitely wide fully connected neural networks to  
768 Gaussian processes. We present here a slightly adapted version which is sufficient for our needs.

769 **Theorem 4** (Theorem 1.2 of [38] (adapted)). *Let  $T \subseteq \mathbb{R}^{m'}$  be some compact set. Let  $\mathcal{Q}(\cdot)$  be some*  
770 *probability distribution on  $\mathbb{R}$  which satisfies*

$$\mathbb{E}_{x \sim \mathcal{Q}(\cdot)}[x] = 0, \quad \mathbb{E}_{x \sim \mathcal{Q}(\cdot)}[x^2] = 1$$

771 *and has finite higher moments. Suppose that for any  $j \in [d]$ , the entries of  $W_i \in \mathbb{R}^{m_j+1, m_j}$  are drawn*  
772 *independently by first sampling  $x \sim \mathcal{Q}(\cdot)$  and then setting  $[W_j]_{rs} = \sqrt{\frac{c_W}{m_j}}x$ . Additionally, suppose*  
773 *that  $\sigma$  is absolutely continuous and that its almost-everywhere defined derivative is polynomially*  
774 *bounded:*

$$\exists p > 0 \text{ s.t. } \forall x \in \mathbb{R} \quad \left\| \frac{\sigma'(x)}{1 + |x|^p} \right\|_{L^\infty(\mathbb{R})} < \infty.$$

775 *Then as  $k \rightarrow \infty$ , the sequence of stochastic processes  $\mathbf{x}_\alpha \in \mathbb{R}^{m'} \mapsto \mathbf{z}_\alpha^{(d)} \in \mathbb{R}^m$  given by a fully*  
776 *connected neural network (Definition 5) set with weights  $W_1, \dots, W_d$  converges weakly in  $C^0(T, \mathbb{R}^m)$*   
777 *to  $\Gamma_\alpha^{(d)}$ , a zero-centered Gaussian process taking values in  $\mathbb{R}^m$  with independent identically distributed*  
778 *coordinates. For any  $r \in [m]$  and inputs  $\mathbf{x}_\alpha, \mathbf{x}_\beta \in T$ , the coordinate-wise covariance function*

$$K_{\alpha\beta}^{(d)} := \text{Cov} \left( \left[ \Gamma_\alpha^{(d)} \right]_r, \left[ \Gamma_\beta^{(d)} \right]_r \right) = \lim_{k \rightarrow \infty} \text{Cov} \left( \left[ \mathbf{z}_\alpha^{(d)} \right]_r, \left[ \mathbf{z}_\beta^{(d)} \right]_r \right)$$

779 for this limiting process satisfies the following recursive relation:

$$K_{\alpha\beta}^{(j)} = c_W \mathbb{E}[\sigma(z_\alpha)\sigma(z_\beta)], \quad \begin{pmatrix} z_\alpha \\ z_\beta \end{pmatrix} \sim \mathcal{N}\left(0, \begin{pmatrix} K_{\alpha\alpha}^{(j-1)} & K_{\alpha\beta}^{(j-1)} \\ K_{\alpha\beta}^{(j-1)} & K_{\beta\beta}^{(j-1)} \end{pmatrix}\right)$$

780 for  $j = 2, \dots, d$ , with the initial condition

$$K_{\alpha\beta}^{(1)} = c_W \mathbb{E} \left[ \sigma \left( \left[ \mathbf{z}_\alpha^{(1)} \right]_1 \right) \sigma \left( \left[ \mathbf{z}_\beta^{(1)} \right]_1 \right) \right],$$

781 where the distribution of  $\left( \left[ \mathbf{z}_\alpha^{(1)} \right]_1, \left[ \mathbf{z}_\beta^{(1)} \right]_1 \right) = (W_1 \mathbf{x}_\alpha, W_1 \mathbf{x}_\beta)$  is determined by the distribution of  
782 the weights  $W_1$ .

783 *Proof.* The above is an adaption of Theorem 1.2 in [38], where the fully connected neural network  
784 has no biases. For a full proof see Hanin [38].  $\square$

785 We now move to the following Proposition arising from Theorem 4, showing that for a symmetric  
786 distribution  $\mathcal{Q}(\cdot)$  and an antisymmetric activation function  $\sigma$ , the random variables corresponding to  
787 the network's outputs when the inputs  $\mathbf{x}_\alpha, \mathbf{x}_\beta$  are two distinct standard basis vectors, converge in  
788 distribution to independent identically distributed zero-centered Gaussian vectors.

789 **Proposition 2.** Let  $T \subseteq \mathbb{R}^{m'}$  be the unit sphere. Suppose the assumptions of Theorem 4 hold.  
790 Suppose also that:

- 791 • The distribution  $\mathcal{Q}(\cdot)$  is symmetric, i.e., if  $x \sim \mathcal{Q}(\cdot)$  then  $-x \sim \mathcal{Q}(\cdot)$ .
- 792 • The activation function  $\sigma$  is not constant and antisymmetric, i.e.,

$$\forall x \in \mathbb{R}. \quad \sigma(x) = -\sigma(-x).$$

- 793 • It holds that

$$\mathbb{E}_{x \sim \mathcal{Q}(\cdot)} [\sigma^2(x)] > 0.$$

794 Let  $\alpha, \beta \in [m']$  be two distinct indices. Denote  $\mathbf{e}_\alpha \in \mathbb{R}^{m'}$  the standard basis vector holding 1 in its  $\alpha$   
795 coordinate and zeros in the rest. Denote  $\mathbf{e}_\beta$  similarly. Then as  $k \rightarrow \infty$  the random output vectors  $\mathbf{z}_\alpha^{(d)}$   
796 and  $\mathbf{z}_\beta^{(d)}$  corresponding to  $\mathbf{e}_\alpha$  and  $\mathbf{e}_\beta$  respectively converge in distribution to two independent random  
797 vectors each with independent entries drawn from the same zero-centered Gaussian distribution.

798 *Proof.* Per Theorem 4, as  $k \rightarrow \infty$  the variables  $\mathbf{z}_\alpha^{(d)}$  and  $\mathbf{z}_\beta^{(d)}$  converge in distribution to zero-centered  
799 Gaussian vectors where for any distinct indices  $r, r' \in [m]$ :

- 800 • The entries  $\left[ \mathbf{z}_\alpha^{(d)} \right]_r, \left[ \mathbf{z}_\alpha^{(d)} \right]_{r'}$  are independent.
- 801 • The entries  $\left[ \mathbf{z}_\beta^{(d)} \right]_r, \left[ \mathbf{z}_\beta^{(d)} \right]_{r'}$  are independent.
- 802 • The entries  $\left[ \mathbf{z}_\alpha^{(d)} \right]_r, \left[ \mathbf{z}_\beta^{(d)} \right]_{r'}$  are independent.

803 Next, using the notation of Theorem 4, we prove via induction on  $d$  that  $K_{\alpha\beta}^{(d)} = 0$ ,  $K_{\alpha\alpha}^{(d)} = K_{\beta\beta}^{(d)}$  and  
804 that  $K_{\alpha\alpha}^{(d)}$  is finite and positive. First, for the base case, note that we have

$$\begin{aligned} K_{\alpha\beta}^{(1)} &= c_W \mathbb{E} \left[ \sigma \left( \left[ \mathbf{z}_\alpha^{(1)} \right]_1 \right) \sigma \left( \left[ \mathbf{z}_\beta^{(1)} \right]_1 \right) \right] \\ &= c_W \mathbb{E} \left[ \sigma \left( [W_1 \mathbf{e}_\alpha]_1 \right) \sigma \left( [W_1 \mathbf{e}_\beta]_1 \right) \right] \\ &= c_W \mathbb{E} \left[ \sigma \left( [W_1]_{1,\alpha} \right) \sigma \left( [W_1]_{1,\beta} \right) \right] \\ &= c_W \mathbb{E} \left[ \sigma \left( [W_1]_{1,\alpha} \right) \right] \mathbb{E} \left[ \sigma \left( [W_1]_{1,\beta} \right) \right], \end{aligned}$$

where the ultimate transition is due to the independence of  $[W_1]_{1,\alpha}$  and  $[W_1]_{1,\beta}$ . Next, since  $\mathcal{Q}(\cdot)$  is symmetric and  $\sigma$  is antisymmetric, we obtain by Lemma 20 that

$$\mathbb{E} \left[ \sigma \left( [W_1]_{1,\alpha} \right) \right] = \mathbb{E} \left[ \sigma \left( [W_1]_{1,\beta} \right) \right] = 0.$$

Overall, we obtain that

$$K_{\alpha\beta}^{(1)} = c_W \cdot 0 \cdot 0 = 0.$$

Additionally, since  $[W_1]_{1,\alpha}$  and  $[W_1]_{1,\beta}$  are both drawn from  $\mathcal{Q}(\cdot)$ , we obtain that

$$\begin{aligned} K_{\alpha\alpha}^{(1)} &= c_W \mathbb{E} \left[ \sigma \left( [\mathbf{z}_\alpha^{(1)}]_1 \right) \sigma \left( [\mathbf{z}_\alpha^{(1)}]_1 \right) \right] \\ &= c_W \mathbb{E} \left[ \sigma \left( [W_1]_{1,\alpha} \right) \sigma \left( [W_1]_{1,\alpha} \right) \right] \\ &= c_W \mathbb{E} \left[ \sigma \left( [W_1]_{1,\beta} \right) \sigma \left( [W_1]_{1,\beta} \right) \right] \\ &= K_{\beta\beta}^{(1)}. \end{aligned}$$

Finally, by our assumption we have that

$$K_{\alpha\alpha}^{(1)} = c_W \mathbb{E} \left[ \sigma \left( [W_1]_{1,\alpha} \right) \sigma \left( [W_1]_{1,\alpha} \right) \right] = c_W \mathbb{E}_{x \sim \mathcal{Q}(\cdot)} [\sigma^2(x)] > 0.$$

as required. Next, fix  $j \in [d]$  and assume that  $K_{\alpha\beta}^{(j)} = 0$ ,  $K_{\alpha\alpha}^{(j)} = K_{\beta\beta}^{(j)}$  and that  $K_{\alpha\alpha}^{(j)}$  is finite and positive. Hence, plugging the inductive assumption into Theorem 4, we obtain that

$$K_{\alpha\beta}^{(j+1)} = c_W \mathbb{E} [\sigma(z_\alpha) \sigma(z_\beta)]$$

where

$$\begin{pmatrix} z_\alpha \\ z_\beta \end{pmatrix} \sim \mathcal{N} \left( 0, \begin{pmatrix} K_{\alpha\alpha}^{(j)} & K_{\alpha\beta}^{(j)} \\ K_{\alpha\beta}^{(j)} & K_{\beta\beta}^{(j)} \end{pmatrix} \right) = \mathcal{N} \left( 0, \begin{pmatrix} K_{\alpha\alpha}^{(j)} & 0 \\ 0 & K_{\alpha\alpha}^{(j)} \end{pmatrix} \right).$$

Therefore,  $z_\alpha$  and  $z_\beta$  are independent identically distributed zero-centered Gaussian variables. Hence, we obtain that

$$K_{\alpha\beta}^{(j+1)} = c_W \mathbb{E} [\sigma(z_\alpha)] \mathbb{E} [\sigma(z_\beta)] = c_W \cdot 0 \cdot 0 = 0,$$

where the penultimate transition is due to Lemma 20. Additionally,

$$K_{\alpha\alpha}^{(j+1)} = c_W \mathbb{E} [\sigma(z_\alpha) \sigma(z_\alpha)] = c_W \mathbb{E} [\sigma(z_\beta) \sigma(z_\beta)] = K_{\beta\beta}^{(j+1)}.$$

Finally, we have by our inductive assumption that  $K_{\alpha\alpha}^{(j)}$  is finite and positive, thus the non-constant random variable  $z_\alpha \sim \mathcal{N}(0, K_{\alpha\alpha}^{(j)})$  has finite moments. Therefore, since  $\sigma$  has a polynomially bounded derivative almost-everywhere and it is not constant, it holds that

$$K_{\alpha\alpha}^{(j+1)} = c_W \mathbb{E} [\sigma(z_\alpha) \sigma(z_\alpha)] > 0$$

as required. Thus by Theorem 4, for any  $j \in [m]$ , the entries  $[\mathbf{z}_\alpha^{(d)}]_j$  and  $[\mathbf{z}_\beta^{(d)}]_j$  converge in distribution to two independent identically distributed zero-centered Gaussian variables as  $k \rightarrow \infty$ . Overall we have shown that as  $k \rightarrow \infty$ , the random vectors  $\mathbf{z}_\alpha^{(d)}$  and  $\mathbf{z}_\beta^{(d)}$  converge to two independent random vectors each with independent entries drawn from the same zero-centered Gaussian distribution, completing the proof.  $\square$

The last two arguments imply the following important Corollary, which states that as  $k \rightarrow \infty$ , the matrix factorization  $W$  converges in distribution to a centered Gaussian matrix (Definition 8).

**Corollary 1.** *As  $k \rightarrow \infty$ , the matrix factorization  $W$  converges in distribution to the random matrix  $W_{\text{iid}} \in \mathbb{R}^{m,m'}$  whose entries are drawn independently from the same zero-centered Gaussian distribution.*

829 *Proof.* Per Proposition 2, as  $k \rightarrow \infty$ , the random output vectors  $\mathbf{z}_1^{(d)}, \dots, \mathbf{z}_{m'}^{(d)}$  corresponding to the  
830 inputs  $\mathbf{e}_1, \dots, \mathbf{e}_{m'}$  converge in distribution to independent random vectors each with independent  
831 entries drawn from the same zero-centered Gaussian distribution. Therefore, as  $k \rightarrow \infty$ , the random  
832 matrix

$$\begin{pmatrix} \mathbf{z}_1^{(d)} & \dots & \mathbf{z}_{m'}^{(d)} \end{pmatrix} \in \mathbb{R}^{m, m'}$$

833 converges in distribution to the random matrix  $W_{\text{iid}} \in \mathbb{R}^{m, m'}$  whose entries are drawn independently  
834 from the same zero-centered Gaussian distribution. The claim follows by Lemma 1 which states that  
835 the above matrix is equal to  $W$ .  $\square$

#### 836 A.2.4 Convergence in Distribution Implies Sufficient Condition

837 In the previous section, Corollary 1 showed that  $W$  converges in distribution to a random matrix  
838 with independent entries drawn from the same zero-centered Gaussian distribution. In this section,  
839 we use basic tools from probability theory in order to show that this convergence in fact implies the  
840 quantities in Lemma 2 converge, completing the proof of Theorem 1. We begin by introducing the  
841 concept of continuity sets:

842 **Definition 6.** Let  $X$  be some random variable on the space  $\Omega$ . A set  $A \subseteq \Omega$  is a *continuity set* of  $X$   
843 when

$$\mathcal{P}(X \in \partial A) = 0$$

844 where  $\partial A$  is the boundary of  $A$ .

845 The main tool we employ in this part of the proof is Portmanteau's Theorem, which states that  
846 convergence in distribution implies convergence in the probability of any continuity set:

847 **Theorem 5.** Let  $\{X_k\}_{k=1}^\infty$  be a series of random variables on the same space  $\Omega$ . Let  $X$  be a random  
848 variable on the space  $\Omega$ . If

$$X_k \xrightarrow[k \rightarrow \infty]{\text{dist.}} X$$

849 then for any continuity set  $A$  of  $X$  (Definition 6) it holds that

$$\lim_{k \rightarrow \infty} \mathcal{P}(X_k \in A) = \mathcal{P}(X \in A)$$

850 *Proof.* See Duchi [28].  $\square$

851 In order to invoke Theorem 5, we continue to showing that the sets in question are all continuity sets  
852 of  $W_{\text{iid}}$ . We begin by showing that the set with low training error and the set with low generalization  
853 error are both continuity sets of  $W_{\text{iid}}$ .

854 **Proposition 3.** The sets

$$S_{\text{gen}} := \{W \in \mathbb{R}^{m, m'} : \mathcal{L}_{\text{gen}}(W) < \epsilon_{\text{gen}}\}, \quad S_{\text{train}} := \{W \in \mathbb{R}^{m, m'} : \mathcal{L}_{\text{train}}(W) < \epsilon_{\text{train}}\}$$

855 are continuity sets of  $W_{\text{iid}}$  (Definition 6).

856 *Proof.* Consider the first set (the proof is identical for the second). The boundary of the set is of the  
857 form

$$\{W \in \mathbb{R}^{m, m'} : \mathcal{L}_{\text{gen}}(W) - \epsilon_{\text{gen}} = 0\}$$

858 Since  $\mathcal{L}_{\text{gen}}(W)$  is a polynomial in the entries of  $W$  and  $\mathcal{L}_{\text{gen}}(W^*) - \epsilon_{\text{gen}} \neq 0$ , the polynomial  
859  $\mathcal{L}_{\text{gen}}(W) - \epsilon_{\text{gen}}$  is not the zero polynomial. Therefore by Lemma 23 the boundary has Lebesgue  
860 measure zero. Per Corollary 1,  $W_{\text{iid}}$  has a continuous distribution over  $\mathbb{R}^{m, m'}$  and thus it must hold  
861 that

$$\mathcal{P}\left(W_{\text{iid}} \in \{W \in \mathbb{R}^{m, m'} : \mathcal{L}_{\text{gen}}(W) - \epsilon_{\text{gen}} = 0\}\right) = 0,$$

862 i.e., the set is a continuity set.  $\square$

863 The next Lemma shows that the intersection of two continuity sets is also a continuity set, hence  
 864 Proposition 3 implies that  $S_{gen} \cap S_{train}$  is also a continuity set.

865 **Lemma 3.** *Let  $X$  be a random variable over the space  $\Omega$ . Let  $A, B \subseteq \Omega$  be continuity sets of  $X$*   
 866 *(Definition 6). Then the set  $A \cap B$  is a continuity set of  $X$ .*

867 *Proof.* Per Definition 6 it holds that

$$\mathcal{P}(X \in \partial A) = 0, \quad \mathcal{P}(X \in \partial B) = 0$$

868 and so

$$\mathcal{P}(X \in \partial A \cup \partial B) = 0.$$

869 Hence, the proof follows if

$$\partial(A \cap B) \subseteq \partial A \cup \partial B.$$

870 First, recall that for any  $X \subseteq \Omega$

$$\partial X = \overline{X} \cap \overline{C_\Omega(X)},$$

871 where  $\overline{X}$  is the closure of  $X$  and  $C_\Omega(\cdot)$  is the complement operator. Next, we have that

$$\overline{(A \cap B)} \subseteq \overline{A}, \quad \overline{(A \cap B)} \subseteq \overline{B}.$$

872 Finally, it holds that

$$\overline{C_\Omega(A \cap B)} = \overline{C_\Omega(A) \cup C_\Omega(B)} = \overline{C_\Omega(A)} \cup \overline{C_\Omega(B)},$$

873 therefore,

$$\begin{aligned} \partial(A \cap B) &= \overline{(A \cap B)} \cap \overline{C_\Omega(A \cap B)} \\ &= \overline{(A \cap B)} \cap \left( \overline{C_\Omega(A)} \cup \overline{C_\Omega(B)} \right) \\ &= \left( \overline{(A \cap B)} \cap \overline{C_\Omega(A)} \right) \cup \left( \overline{(A \cap B)} \cap \overline{C_\Omega(B)} \right) \\ &\subseteq \left( \overline{A} \cap \overline{C_\Omega(A)} \right) \cup \left( \overline{B} \cap \overline{C_\Omega(B)} \right) \\ &= \partial A \cup \partial B \end{aligned}$$

874 as required. □

875 Overall, we have shown that Corollary 1 implies together with Theorem 5 and Proposition 3 that

$$\lim_{k \rightarrow \infty} |\mathcal{P}(\mathcal{L}_{gen}(W) < \epsilon_{gen}) \cap \{\mathcal{L}_{train}(W) < \epsilon_{train}\}) - \mathcal{P}(\mathcal{L}_{gen}(W_{iid}) < \epsilon_{gen}) \cap \{\mathcal{L}_{train}(W_{iid}) < \epsilon_{train}\})| = 0,$$

876

$$\lim_{k \rightarrow \infty} |\mathcal{P}(\{\mathcal{L}_{train}(W) < \epsilon_{train}\}) - \mathcal{P}(\{\mathcal{L}_{train}(W_{iid}) < \epsilon_{train}\})| = 0,$$

877 and

$$\lim_{k \rightarrow \infty} |\mathcal{P}(\mathcal{L}_{gen}(W) < \epsilon_{gen}) - \mathcal{P}(\mathcal{L}_{gen}(W_{iid}) < \epsilon_{gen})| = 0.$$

878 Hence, the proof follows by invoking Lemma 2 which implies Theorem 1.

### 879 A.3 Proof for Gaussian Distribution and Finite Width

880 The outline of the proof is as follows; Appendix A.3.1 presents Theorem 6, of which the canonical  
 881 case of Theorem 1 is a special case. Appendix A.3.2 provides a useful Lemma used in the proof.  
 882 Finally, Appendix A.3.3 adapts a result from Favaro et al. [31] showing that a matrix factorization  
 883 with Gaussian weights has a bounded convex distance from a centered Gaussian matrix (Definition 8)  
 884 and arguing that the latter bound implies the conditions required for the Lemma in Appendix A.3.2.

### 885 A.3.1 Restatement of the Canonical Case of Theorem 1

886 The canonical case of Theorem 1 follows from Theorem 6, which allows for the activation  $\sigma(\cdot)$  to be  
 887 slightly more general. Theorem 6 is presented below; afterwards, we demonstrate how it implies the  
 888 canonical case of Theorem 1.

889 **Theorem 6.** *Let  $d \in \mathbb{N}$  be a fixed depth. Let  $\mathcal{N}(\cdot)$  be the standard Gaussian distribution, i.e.,*  
 890  *$\mathcal{N}(\cdot) := \mathcal{N}(\cdot; 0, 1)$ . Let  $\sigma(\cdot)$  be an activation function that is not constant and antisymmetric, i.e.,*

$$\forall x \in \mathbb{R}. \sigma(x) = -\sigma(-x),$$

891 *furthermore suppose that  $\sigma$  is absolutely continuous, and that its almost-everywhere defined derivative*  
 892 *is polynomially bounded, i.e:*

$$\exists p > 0 \text{ s.t. } \forall x \in \mathbb{R} \quad \left\| \frac{\sigma'(x)}{1 + |x|^p} \right\|_{L^\infty(\mathbb{R})} < \infty.$$

893 *Suppose also that*

$$\mathbb{E}_{x \sim \mathcal{N}(\cdot)} [\sigma^2(x)] > 0.$$

894 *Let  $\epsilon_{\text{gen}}, \epsilon_{\text{train}}, c_W > 0$ . Suppose that for any  $j \in [d]$ , the entries of  $W_j \in \mathbb{R}^{m_{j+1}, m_j}$  are drawn*  
 895 *independently by first sampling  $x \sim \mathcal{N}(\cdot)$  and then setting  $[W_j]_{rs} = \sqrt{\frac{c_W}{m_j}} x$ . Then there exists a*  
 896 *constant  $c > 0$  dependent on  $m, m', d, \sigma, c_W, n, \epsilon_{\text{train}}$  and  $\epsilon_{\text{gen}}$ , and a constant  $k_0 \in \mathbb{N}$  dependent on*  
 897  *$c$  and  $\mathcal{P}(\mathcal{L}_{\text{train}}(W_{\text{iid}}) < \epsilon_{\text{train}})$ , such that for any  $k \geq k_0$  the matrix factorization  $W$  satisfies*

$$\mathcal{P}(\mathcal{L}_{\text{gen}}(W) < \epsilon_{\text{gen}} \mid \mathcal{L}_{\text{train}}(W) < \epsilon_{\text{train}}) - \mathcal{P}(\mathcal{L}_{\text{gen}}(W) < \epsilon_{\text{gen}}) \leq \frac{\frac{2c}{\sqrt{k}}}{\mathcal{P}(\mathcal{L}_{\text{train}}(W_{\text{iid}}) < \epsilon_{\text{train}}) - \frac{c}{\sqrt{k}}}.$$

898 Note that the above bound is of order  $\frac{1}{\sqrt{k}}$ .

899 **Remark 1.** *For any  $k \geq k_0$  it holds that*

$$\frac{\frac{2c}{\sqrt{k}}}{\mathcal{P}(\mathcal{L}_{\text{train}}(W_{\text{iid}}) < \epsilon_{\text{train}}) - \frac{c}{\sqrt{k}}} \cdot \sqrt{k} = \frac{2c}{\mathcal{P}(\mathcal{L}_{\text{train}}(W_{\text{iid}}) < \epsilon_{\text{train}}) - \frac{c}{\sqrt{k}}} = \Omega(1),$$

900 *hence*

$$\frac{\frac{2c}{\sqrt{k}}}{\mathcal{P}(\mathcal{L}_{\text{train}}(W_{\text{iid}}) < \epsilon_{\text{train}}) - \frac{c}{\sqrt{k}}} = O\left(\frac{1}{\sqrt{k}}\right).$$

901 Let  $\mathcal{N}(\cdot; 0, \nu)$  be a zero-centered Gaussian distribution, and let  $\sigma(\cdot)$  be an admissible activation  
 902 function (Definition 4) that is antisymmetric. First, observe that since Theorem 6 allows for arbitrary  
 903  $c_W > 0$ , one may view  $\mathcal{N}(\cdot; 0, \nu)$  as the standard Gaussian distribution  $\mathcal{N}(\cdot)$  scaled by  $\sqrt{\nu}$ . Next,  
 904 note that since  $\mathcal{N}(\cdot)$  assigns a positive probability to every neighborhood of the origin and has finite  
 905 higher moments, and since  $\sigma(\cdot)$  does not vanish on both sides of the origin, it must hold that

$$\mathbb{E}_{x \sim \mathcal{N}(\cdot)} [\sigma^2(x)] > 0.$$

906 The rest of the conditions in Theorem 6 are directly fulfilled by the properties of admissible activation  
 907 functions (Definition 4) that are antisymmetric. Overall we showed that Theorem 6 applies for  
 908  $\mathcal{N}(\cdot; 0, \nu)$  and  $\sigma(\cdot)$ , and so it suffices to prove Theorem 6.

### 909 A.3.2 Sufficient Condition for Theorem 6

910 A useful Lemma used in the proof of Theorem 6 is provided below. Before presenting the Lemma,  
 911 we define the convex distance between random variables, and prove that the sets of matrices with  
 912 either low training error or low generalization error are convex.

913 **Definition 7.** Let  $m \in \mathbb{N}$  and let  $X$  and  $Y$  be two  $m$ -dimensional random variables. The *convex*  
 914 *distance* between  $X$  and  $Y$  is defined as

$$d_c(X, Y) := \sup_B |\mathcal{P}(X \in B) - \mathcal{P}(Y \in B)|,$$

915 where the supremum runs over all convex  $B \subset \mathbb{R}^m$ .



916 **Remark 2.** The convex distance between two random matrices is naturally defined as the convex  
 917 distance between their corresponding flattened vector representations.

918 **Lemma 4.** Let  $\epsilon_{\text{gen}}, \epsilon_{\text{train}} > 0$ . The sets

$$S_{\text{train}} := \left\{ W \in \mathbb{R}^{m, m'} : \mathcal{L}_{\text{train}}(W) < \epsilon_{\text{train}} \right\}, \quad S_{\text{gen}} := \left\{ W \in \mathbb{R}^{m, m'} : \mathcal{L}_{\text{gen}}(W) < \epsilon_{\text{gen}} \right\}$$

919 are convex.

920 *Proof.* We prove that  $S_{\text{gen}}$  is convex (one can prove the same claim about  $S_{\text{train}}$  using identical  
 921 arguments). To do this, it suffices to show that  $\mathcal{L}_{\text{train}}(W)$  is a convex function. Because sums of  
 922 convex functions are convex, it suffices to show that the function corresponding to a single test matrix,  
 923 namely

$$(\langle A, W \rangle - \langle A, W^* \rangle)^2$$

924 for some  $A \in \mathcal{B}$  is convex, and this is the case because it is the composition of an affine function  
 925 with the convex function  $x \rightarrow x^2$ .  $\square$

926 **Remark 3.** The intersection of two convex sets is convex, thus the following set is also convex

$$\left\{ W \in \mathbb{R}^{m, m'} : \mathcal{L}_{\text{train}}(W) < \epsilon_{\text{train}}, \mathcal{L}_{\text{gen}}(W) < \epsilon_{\text{gen}} \right\}.$$

927 We are now ready to present the Lemma. The Lemma show that if the convex distance between the  
 928 matrix factorization (Equation (4)) and a centered Gaussian matrix (Definition 8) is  $O\left(\frac{1}{\sqrt{k}}\right)$ , then for  
 929 any large enough  $k$  the probability for having low generalization loss (Equation (3)) conditioned on  
 930 having low training loss (Equation (2)) is no more than order  $O\left(\frac{1}{\sqrt{k}}\right)$  larger than the prior probability  
 931 of having low generalization loss.

932 **Lemma 5.** Let  $\epsilon_{\text{gen}}, \epsilon_{\text{train}} > 0$ . Let  $W_{\text{iid}} \in \mathbb{R}^{m, m'}$  be a centered Gaussian matrix (Definition 8).  
 933 Suppose that there exists some  $c > 0$  such that the convex distance between  $W$  and  $W_{\text{iid}}$  (Definition 7)  
 934 satisfies

$$d_c(W, W_{\text{iid}}) \leq \frac{c}{\sqrt{k}}.$$

935 Then there exists some  $k_0 \in \mathbb{N}$  dependent on  $c$  and  $\mathcal{P}(\mathcal{L}_{\text{train}}(W_{\text{iid}}) < \epsilon_{\text{train}})$  such that for any  $k \geq k_0$   
 936 it holds that

$$\mathcal{P}\left(\mathcal{L}_{\text{gen}}(W) < \epsilon_{\text{gen}} \mid \mathcal{L}_{\text{train}}(W) < \epsilon_{\text{train}}\right) \leq \mathcal{P}(\mathcal{L}_{\text{gen}}(W) < \epsilon_{\text{gen}}) + \frac{\frac{2c}{\sqrt{k}}}{\mathcal{P}(\mathcal{L}_{\text{train}}(W_{\text{iid}}) < \epsilon_{\text{train}}) - \frac{c}{\sqrt{k}}}.$$

937 *Proof.* Per Definition 7, Lemma 4, , and Remark 3, the fact that  $d_c(W, W_{\text{iid}}) \leq \frac{c}{\sqrt{k}}$  implies that

$$|\mathcal{P}(\mathcal{L}_{\text{train}}(W) < \epsilon_{\text{train}}) - \mathcal{P}(\mathcal{L}_{\text{train}}(W_{\text{iid}}) < \epsilon_{\text{train}})| \leq \frac{c}{\sqrt{k}},$$

938

$$|\mathcal{P}(\mathcal{L}_{\text{gen}}(W) < \epsilon_{\text{gen}}) - \mathcal{P}(\mathcal{L}_{\text{gen}}(W_{\text{iid}}) < \epsilon_{\text{gen}})| \leq \frac{c}{\sqrt{k}},$$

939 and

$$|\mathcal{P}(\mathcal{L}_{\text{train}}(W) < \epsilon_{\text{train}}, \mathcal{L}_{\text{gen}}(W) < \epsilon_{\text{gen}}) - \mathcal{P}(\mathcal{L}_{\text{train}}(W_{\text{iid}}) < \epsilon_{\text{train}}, \mathcal{L}_{\text{gen}}(W_{\text{iid}}) < \epsilon_{\text{gen}})| \leq \frac{c}{\sqrt{k}}.$$

940 By the definition of the conditional probability we have that

$$\mathcal{P}(\mathcal{L}_{\text{gen}}(W) < \epsilon_{\text{gen}} \mid \mathcal{L}_{\text{train}}(W) < \epsilon_{\text{train}}) = \frac{\mathcal{P}(\mathcal{L}_{\text{train}}(W) < \epsilon_{\text{train}}, \mathcal{L}_{\text{gen}}(W) < \epsilon_{\text{gen}})}{\mathcal{P}(\mathcal{L}_{\text{train}}(W) < \epsilon_{\text{train}})}.$$

941 Since  $W_{\text{iid}}$  is a centered Gaussian matrix (Definition 8), it holds that  $\mathcal{P}(\mathcal{L}_{\text{train}}(W_{\text{iid}}) < \epsilon_{\text{train}}) > 0$  and  
 942 so for any

$$k \geq \left( \frac{c}{\mathcal{P}(\mathcal{L}_{\text{train}}(W_{\text{iid}}) < \epsilon_{\text{train}})} \right)^2 =: k_0$$

943 it holds that  $\mathcal{P}(\mathcal{L}_{\text{train}}(W_{\text{iid}}) < \epsilon_{\text{train}}) - \frac{c}{\sqrt{k}} > 0$ . Therefore, for any such  $k$  the above is bound by

$$\begin{aligned}
& \mathcal{P}(\mathcal{L}_{\text{gen}}(W) < \epsilon_{\text{gen}} \mid \mathcal{L}_{\text{train}}(W) < \epsilon_{\text{train}}) \\
& \leq \frac{\mathcal{P}(\mathcal{L}_{\text{train}}(W_{\text{iid}}) < \epsilon_{\text{train}}, \mathcal{L}_{\text{gen}}(W_{\text{iid}}) < \epsilon_{\text{gen}}) + \frac{c}{\sqrt{k}}}{\mathcal{P}(\mathcal{L}_{\text{train}}(W_{\text{iid}}) < \epsilon_{\text{train}}) - \frac{c}{\sqrt{k}}} \\
& = \frac{\mathcal{P}(\mathcal{L}_{\text{train}}(W_{\text{iid}}) < \epsilon_{\text{train}}) \cdot \mathcal{P}(\mathcal{L}_{\text{gen}}(W_{\text{iid}}) < \epsilon_{\text{gen}}) + \frac{c}{\sqrt{k}}}{\mathcal{P}(\mathcal{L}_{\text{train}}(W_{\text{iid}}) < \epsilon_{\text{train}}) - \frac{c}{\sqrt{k}}} \\
& \leq \frac{\mathcal{P}(\mathcal{L}_{\text{train}}(W_{\text{iid}}) < \epsilon_{\text{train}}) \cdot \left( \mathcal{P}(\mathcal{L}_{\text{gen}}(W) < \epsilon_{\text{gen}}) + \frac{c}{\sqrt{k}} \right) + \frac{c}{\sqrt{k}}}{\mathcal{P}(\mathcal{L}_{\text{train}}(W_{\text{iid}}) < \epsilon_{\text{train}}) - \frac{c}{\sqrt{k}}} \\
& = \mathcal{P}(\mathcal{L}_{\text{gen}}(W) < \epsilon_{\text{gen}}) \cdot \frac{\mathcal{P}(\mathcal{L}_{\text{train}}(W_{\text{iid}}) < \epsilon_{\text{train}})}{\mathcal{P}(\mathcal{L}_{\text{train}}(W_{\text{iid}}) < \epsilon_{\text{train}}) - \frac{c}{\sqrt{k}}} + \frac{\mathcal{P}(\mathcal{L}_{\text{train}}(W_{\text{iid}}) < \epsilon_{\text{train}}) \cdot \frac{c}{\sqrt{k}} + \frac{c}{\sqrt{k}}}{\mathcal{P}(\mathcal{L}_{\text{train}}(W_{\text{iid}}) < \epsilon_{\text{train}}) - \frac{c}{\sqrt{k}}} \\
& \leq \mathcal{P}(\mathcal{L}_{\text{gen}}(W) < \epsilon_{\text{gen}}) + \frac{\frac{2c}{\sqrt{k}}}{\mathcal{P}(\mathcal{L}_{\text{train}}(W_{\text{iid}}) < \epsilon_{\text{train}}) - \frac{c}{\sqrt{k}}}.
\end{aligned}$$

944 In the third transition we have used the fact that the measurement matrices  $A$  in  $\mathcal{B}$  are orthogonal to  
945  $A_1, \dots, A_n$  and thus

$$\begin{aligned}
& \mathcal{P}(\mathcal{L}_{\text{gen}}(W_{\text{iid}}) < \epsilon_{\text{gen}}, \mathcal{L}_{\text{train}}(W_{\text{iid}}) < \epsilon_{\text{train}}) \\
& = \mathcal{P}\left(\frac{1}{B} \sum_{A \in \mathcal{B}} (\langle A, W_{\text{iid}} \rangle - \langle A, W^* \rangle)^2 < \epsilon_{\text{gen}}, \frac{1}{n} \sum_{i=1}^n (\langle A_i, W_{\text{iid}} \rangle - y_i)^2 < \epsilon_{\text{train}}\right) \\
& = \mathcal{P}\left(\frac{1}{B} \sum_{A \in \mathcal{B}} (\langle A, W_{\text{iid}} \rangle - \langle A, W^* \rangle)^2 < \epsilon_{\text{gen}}\right) \cdot \mathcal{P}\left(\frac{1}{n} \sum_{i=1}^n (\langle A_i, W_{\text{iid}} \rangle - y_i)^2 < \epsilon_{\text{train}}\right) \\
& = \mathcal{P}(\mathcal{L}_{\text{gen}}(W_{\text{iid}}) < \epsilon_{\text{gen}}) \cdot \mathcal{P}(\mathcal{L}_{\text{train}}(W_{\text{iid}}) < \epsilon_{\text{train}}),
\end{aligned}$$

946 where the second equality stems from the fact that for any fixed vectors  $v_1, \dots, v_r$  which are orthog-  
947 onal (each of the flattened matrices  $A_1, \dots, A_n$  and the flattened  $A$ ), and a vector of independent  
948 identically distributed zero-centered Gaussians  $X$  (the flattened  $W_{\text{iid}}$ ), the variables  $\{\langle X, v_i \rangle\}_{1 \leq i \leq r}$   
949 are independent.  $\square$

### 950 A.3.3 Bound on Convex Distance from a Centered Gaussian Matrix

951 In this section we prove that for any width  $k$ , the matrix factorization has a bounded convex distance  
952 from a centered Gaussian matrix (Definition 8). Key to the proof is a result of Favaro et al. [31]  
953 which provides a bound on the convex distance a fully connected neural network has from a Gaussian  
954 process. We present a softer adaption of it sufficient for our needs.

955 **Theorem 7** (Theorem 3.6 of [31] (adapted)). *Let  $\mathcal{N}(\cdot)$  be the standard Gaussian distribution.*  
956 *Suppose that for any  $j \in [d]$ , the entries of  $W_j \in \mathbb{R}^{m_{j+1}, m_j}$  are drawn independently by first*  
957 *sampling  $x \sim \mathcal{N}(\cdot)$  and then setting  $[W_j]_{rs} = \sqrt{\frac{c_W}{m_j}} x$ . Additionally, suppose that  $\sigma$  is absolutely*  
958 *continuous and that its almost-everywhere defined derivative is polynomially bounded:*

$$\exists p > 0 \text{ s.t. } \forall x \in \mathbb{R} \quad \left\| \frac{\sigma'(x)}{1 + |x|^p} \right\|_{L^\infty(\mathbb{R})} < \infty.$$

959 For any  $j = 2, \dots, d$  denote the matrix  $K^{(j)} \in \mathbb{R}^{m', m'}$  by

$$\forall \alpha, \beta \in [m']. K_{\alpha\beta}^{(j)} = c_W \mathbb{E}[\sigma(z_\alpha)\sigma(z_\beta)], \quad \begin{pmatrix} z_\alpha \\ z_\beta \end{pmatrix} \sim \mathcal{N}\left(0, \begin{pmatrix} K_{\alpha\alpha}^{(j-1)} & K_{\alpha\beta}^{(j-1)} \\ K_{\beta\alpha}^{(j-1)} & K_{\beta\beta}^{(j-1)} \end{pmatrix}\right)$$

960 with the initial condition

$$\forall \alpha, \beta \in [m']. K_{\alpha\beta}^{(1)} = c_W \mathbb{E}[\sigma([W_1 \mathbf{e}_\alpha]_1) \sigma([W_1 \mathbf{e}_\beta]_1)]$$

961 where for  $\alpha \in [m']$ , the vector  $\mathbf{e}_\alpha \in \mathbb{R}^{m'}$  is the standard basis vector holding 1 in its  $\alpha$  coordinate  
 962 and zeros in the rest. Additionally, for  $\alpha \in [m']$  denote by  $\mathbf{z}_\alpha^{(d)}$  the output given by a fully connected  
 963 neural network (Definition 5) set with weights  $W_1, \dots, W_d$  for the input  $\mathbf{e}_\alpha$ . Lastly, for  $\alpha \in [m']$   
 964 denote by  $\Gamma_\alpha^{(d)}$  a  $m$ -dimensional zero-centered Gaussian vector with

$$\forall \alpha, \beta \in [m'], r, r' \in [m]. \text{Cov} \left( \left[ \Gamma_\alpha^{(d)} \right]_r, \left[ \Gamma_\beta^{(d)} \right]_{r'} \right) = \mathbf{1}_{r=r'} K_{\alpha\beta}^{(d)}.$$

965 If for any  $j \in [d]$  the matrix  $K^{(j)}$  is invertible, then there exists  $c > 0$  dependent on  
 966  $m, m', d, \sigma, c_W, n, \epsilon_{\text{train}}$  and  $\epsilon_{\text{gen}}$  such that for any  $k \in \mathbb{N}$  it holds that

$$d_c \left( \left( \mathbf{z}_\alpha^{(d)} \right)_{\alpha \in [m']}, \left( \Gamma_\alpha^{(d)} \right)_{\alpha \in [m']} \right) \leq \frac{c}{\sqrt{k}},$$

967 where we have implicitly regarded  $\left( \mathbf{z}_\alpha^{(d)} \right)_{\alpha \in [m']}$  and  $\left( \Gamma_\alpha^{(d)} \right)_{\alpha \in [m']}$  as  $m' \cdot m$ -dimensional random  
 968 vectors.

969 *Proof.* The above is an adaption of case (1) of Theorem 3.6 in [31], where the fully connected neural  
 970 network has no biases, the partial derivatives in question are all of order zero and the finite collection  
 971 of distinct non-zero network inputs is  $\{\mathbf{e}_\alpha\}_{\alpha=1}^{m'}$ . For a full proof see Favaro et al. [31].  $\square$

972 We move forward to the following Lemma, showing that for an antisymmetric activation function  $\sigma$   
 973 the covariance matrices  $K^{(j)}$  are not only invertible but also a positive multiple of the identity.

974 **Lemma 6.** Suppose the assumptions of Theorem 7 hold. Suppose also that

- 975 • The activation function  $\sigma$  is not constant and antisymmetric, i.e.,

$$\forall x \in \mathbb{R}. \sigma(x) = -\sigma(-x).$$

- 976 • It holds that

$$\mathbb{E}_{x \sim \mathcal{N}(\cdot)} [\sigma^2(x)] > 0.$$

977 Then for any  $j \in [d]$  there exists a positive constant  $b^{(j)} > 0$  such that  $K^{(j)} = b^{(j)} I_{m'}$

978 *Proof.* The proof is extremely similar to that of Proposition 2. We prove via induction on  $d$  that  
 979  $K_{\alpha\beta}^{(d)} = 0$ ,  $K_{\alpha\alpha}^{(d)} = K_{\beta\beta}^{(d)}$  and that  $K_{\alpha\alpha}^{(d)}$  is finite and positive. First, for the base case, note that we  
 980 have

$$\begin{aligned} K_{\alpha\beta}^{(1)} &= c_W \mathbb{E} [\sigma([W_1 \mathbf{e}_\alpha]_1) \sigma([W_1 \mathbf{e}_\beta]_1)] \\ &= c_W \mathbb{E} [\sigma([W_1]_{1,\alpha}) \sigma([W_1]_{1,\beta})] \\ &= c_W \mathbb{E} [\sigma([W_1]_{1,\alpha})] \mathbb{E} [\sigma([W_1]_{1,\beta})], \end{aligned}$$

981 where the ultimate transition is due to the independence of  $[W_1]_{1,\alpha}$  and  $[W_1]_{1,\beta}$ . Next, since  $\mathcal{N}(\cdot)$  is  
 982 symmetric and  $\sigma$  is antisymmetric, we obtain by Lemma 20 that

$$\mathbb{E} [\sigma([W_1]_{1,\alpha})] = \mathbb{E} [\sigma([W_1]_{1,\beta})] = 0.$$

983 Overall, we obtain that

$$K_{\alpha\beta}^{(1)} = c_W \cdot 0 \cdot 0 = 0.$$

984 Additionally, since  $[W_1]_{1,\alpha}$  and  $[W_1]_{1,\beta}$  are both drawn from  $\mathcal{N}(\cdot)$ , we obtain that

$$\begin{aligned} K_{\alpha\alpha}^{(1)} &= c_W \mathbb{E} [\sigma([W_1]_{1,\alpha}) \sigma([W_1]_{1,\alpha})] \\ &= c_W \mathbb{E} [\sigma([W_1]_{1,\beta}) \sigma([W_1]_{1,\beta})] \\ &= K_{\beta\beta}^{(1)}. \end{aligned}$$

985 Finally, by our assumption we have that

$$b^{(1)} := K_{\alpha\alpha}^{(1)} = c_W \mathbb{E} \left[ \sigma \left( [W_1]_{1,\alpha} \right) \sigma \left( [W_1]_{1,\alpha} \right) \right] = c_W \mathbb{E}_{x \sim \mathcal{Q}(\cdot)} [\sigma^2(x)] > 0.$$

986 as required. Next, fix  $j \in [d]$  and assume that  $K_{\alpha\beta}^{(j)} = 0$ ,  $K_{\alpha\alpha}^{(j)} = K_{\beta\beta}^{(j)}$  and that  $K_{\alpha\alpha}^{(j)}$  is finite and  
987 positive. Hence, plugging the inductive assumption into Theorem 4, we obtain that

$$K_{\alpha\beta}^{(j+1)} = c_W \mathbb{E} [\sigma(z_\alpha) \sigma(z_\beta)]$$

988 where

$$\begin{pmatrix} z_\alpha \\ z_\beta \end{pmatrix} \sim \mathcal{N} \left( 0, \begin{pmatrix} K_{\alpha\alpha}^{(j)} & K_{\alpha\beta}^{(j)} \\ K_{\alpha\beta}^{(j)} & K_{\beta\beta}^{(j)} \end{pmatrix} \right) = \mathcal{N} \left( 0, \begin{pmatrix} K_{\alpha\alpha}^{(j)} & 0 \\ 0 & K_{\alpha\alpha}^{(j)} \end{pmatrix} \right).$$

989 Therefore,  $z_\alpha$  and  $z_\beta$  are independent identically distributed zero-centered Gaussian variables. Hence,  
990 we obtain that

$$K_{\alpha\beta}^{(j+1)} = c_W \mathbb{E} [\sigma(z_\alpha)] \mathbb{E} [\sigma(z_\beta)] = c_W \cdot 0 \cdot 0 = 0,$$

991 where the penultimate transition is due to Lemma 20. Additionally,

$$K_{\alpha\alpha}^{(j+1)} = c_W \mathbb{E} [\sigma(z_\alpha) \sigma(z_\alpha)] = c_W \mathbb{E} [\sigma(z_\beta) \sigma(z_\beta)] = K_{\beta\beta}^{(j+1)}.$$

992 Finally, we have by our inductive assumption that  $K_{\alpha\alpha}^{(j)}$  is finite and positive, thus the non-constant  
993 random variable  $z_\alpha \sim \mathcal{N}(0, K_{\alpha\alpha}^{(j)})$  has finite moments. Therefore, since  $\sigma$  has a polynomially  
994 bounded derivative almost-everywhere and it is not constant, it holds that

$$b^{(j+1)} := K_{\alpha\alpha}^{(j+1)} = c_W \mathbb{E} [\sigma(z_\alpha) \sigma(z_\alpha)] > 0$$

995 completing the proof. □

996 Theorem 7 and Lemma 6 together imply the following Corollary, which states that  $\left( \mathbf{z}_\alpha^{(d)} \right)_{\alpha \in [m']}$  is  
997 bounded away from a zero-centered Gaussian vector with independent entries.

998 **Corollary 2.** *There exists  $c > 0$  dependent on  $m, m', d, \sigma, c_W, n, \epsilon_{\text{train}}$  and  $\epsilon_{\text{gen}}$  such that for any*  
999  *$k \in \mathbb{N}$ , the  $m' \cdot m$ -dimensional random vector  $\left( \mathbf{z}_\alpha^{(d)} \right)_{\alpha \in [m']}$  corresponding to the concatenated*  
1000 *outputs of the fully connected neural network (Definition 5) for the inputs  $(\mathbf{e}_\alpha)_{\alpha \in [m']}$  satisfies*

$$d_c \left( \left( \mathbf{z}_\alpha^{(d)} \right)_{\alpha \in [m]}, \left( \Gamma_\alpha^{(d)} \right)_{\alpha \in [m]} \right) \leq \frac{c}{\sqrt{k}},$$

1001 where the random variables  $\left( \left[ \Gamma_\alpha^{(d)} \right]_j \right)_{\alpha \in [m'], j \in [m]}$  are independently drawn from  $\mathcal{N}(0, b^{(d)})$ .

1002 Lemma 1 and Corollary 2 together imply that the matrix factorization  $W$  has the required bound on  
1003 its convex distance from a centered Gaussian matrix  $W_{\text{iid}}$  (Definition 8). Hence, the proof follows by  
1004 invoking Lemma 5 which implies Theorem 6.

## 1005 B Proof of Theorem 2

1006 This appendix proves Theorem 2. Appendix B.1 begins by establishing that for any  $\gamma \in \mathbb{R}_{>0}$ , the  
1007 factorized matrix  $W$  (Equation (4)) is within  $\gamma$  (in Frobenius norm) of a rank one matrix with  
1008 probability  $1 - O(1/d)$ . This finding is utilized by Appendix B.2, which establishes that the  
1009 probability of the events  $\mathcal{L}_{\text{train}}(W) < \epsilon_{\text{train}}$  and  $\mathcal{L}_{\text{gen}}(W) \geq \epsilon_{\text{train}} c$  occurring simultaneously is  $O(1/d)$ .  
1010 Appendix B.3 shows that the probability of  $\mathcal{L}_{\text{train}}(W) < \epsilon_{\text{train}}$  is  $\Omega(1)$ . Finally, Appendix B.4  
1011 combines the findings of Appendices B.2 and B.3 to prove the sought-after result.

## 1012 B.1 $W$ is Close to a Rank One with High Probability

1013 According to Definition 3, the matrices  $W_j$  are obtained by normalizing matrices  $W'_j$  where each  
 1014 entry of  $W'_j$  is drawn independently from the distribution  $\mathcal{Q}_j$ . Specifically, each entry of  $W_j$  equals  
 1015 the corresponding entry of  $W'_j$  divided by  $\|W'_d \cdots W'_1\|^{1/d}$ . In this section, we will analyze the  
 1016 spectrum of the matrix  $W'_{d-1:2} := W'_{d-1} \cdots W'_2$  using results from Hanin and Paouris [39] to  
 1017 show that this implies that with high probability,  $W$  is close to a rank one matrix.

1018 Note that because we normalize the final product, we can assume without loss of generality that  
 1019  $\mathcal{Q}(\cdot)$  is the standard normal distribution  $\mathcal{N}(\cdot; 0, 1)$  rather than  $\mathcal{N}(\cdot; 0, \nu)$ . Any scaling factor from  
 1020  $\nu$  would be eliminated by the normalization. Thus, each entry of  $W'_j$  is independently drawn from  
 1021  $\mathcal{N}(0, 1/m_j)$ , where  $m_j$  is the number of columns in  $W_j$  as defined in Definition 3.

1022 For any  $d > 3$  and  $t \in [k]$ , we will denote the random variable that is the  $t$ th singular value of  $W'_{d-1:2}$   
 1023 by  $s_{d-2,t}$ , and the related quantity of the Lyapunov exponents by  $\lambda_{d-2,t}$ , defined as follows:

$$\lambda_{d-2,t} = \frac{1}{d-2} \log(s_{d-2,t}).$$

1024 The following Theorem provides concentration bounds on the deviation of the Lyapunov exponents  
 1025 of  $W'_{d-1:2}$ .

1026 **Theorem 8.** *There exist universal constants  $\{\mu_{k,t}\}_{t=1}^k$ ,  $c_1, c_2$  and  $c_3$  such that for all  $1 \leq p \leq r \leq k$ ,  
 1027 and any  $s$  for which*

$$s \geq \frac{c_3 r}{(d-2)k} \log\left(\frac{ek}{r}\right),$$

1028 *it holds that*

$$\mathcal{P}\left(\left|\frac{1}{k} \sum_{t=p}^r (\lambda_{d-2,t} - \mu_{k,t})\right| \geq s\right) \leq c_1 \exp(-c_2 k(d-2)s \min\{1, \psi_{k,r}(s)\}),$$

1029 *where  $\psi_{k,r}(s)$  is the function*

$$\psi_{k,r}(s) = \begin{cases} k \min\left\{1, \frac{ks}{r}\right\}, & r \leq \frac{k}{2} \\ k \min\left\{\eta_{k,r}, \frac{s}{\log(1/\eta_{k,r})}\right\}, & \frac{k}{2} < r \leq k \end{cases}$$

1030 *for*

$$\eta_{k,r} := \frac{k-r+1}{k} \in \left[\frac{1}{k}, \frac{k-1}{k}\right].$$

1031 *Proof.* See Theorem 1.1 in Hanin and Paouris [39]. □

1032 We now show that the above deviation estimate implies that with probability converging exponentially  
 1033 to 1, there is a constant gap between the largest and second largest Lyapunov exponents.

1034 **Lemma 7.** *There exist constants  $c_4, c_5, c_6 > 0$  independent of  $d$  such that for all  $d \geq c_4$*

$$\mathcal{P}(\lambda_{d-2,2} \leq \lambda_{d-2,1} - c_5) \geq 1 - \exp(-c_6(d-2)).$$

1035 *Proof.* Obviously  $\mu_{k,1} - \mu_{k,2} > 0$ . We define  $c_5 := \frac{\mu_{k,1} - \mu_{k,2}}{3}$ . Plugging in  $p = r = 1$  into  
 1036 Theorem 8 we get that

$$\mathcal{P}(|\lambda_{d-2,1} - \mu_{k,1}| \geq s) \leq c_1 \exp(-c_2 k(d-2)s \min\{1, \psi_{k,1}(s)\})$$

1037 for all  $s \geq \frac{c_3}{k(d-2)} \log(ek)$ . We take  $d$  large enough such that  $c_5 \geq \frac{c_3}{k(d-2)} \log(ek)$  and take  $s = c_5$ .  
 1038 Plugging in the definition of  $\psi_{k,1}$ , one may obtain that

$$c_2 k(d-2)s \min\{1, \psi_{k,1}(s)\} = \Omega(d),$$

1039 hence

$$\mathcal{P}(|\lambda_{d-2,1} - \mu_{k,1}| \geq c_5) \leq c_1 \exp(-\Omega(d)).$$

1040 The same argument can be applied for  $p = r = 2$  to conclude that

$$\mathcal{P}(|\lambda_{d-2,2} - \mu_{k,2}| \geq c_5) \leq c_1 \exp(-\Omega(d)).$$

1041 Combining these two results by union bound and the triangle inequality yields the theorem. □

1042 The following Lemma implies that the spectrum of  $W'_{d-1:2}$  is rapidly decaying, and in particular that  
 1043 it can be well approximated by a rank one matrix.

1044 **Lemma 8.** *Let  $E$  be the best rank one approximation to  $W'_{d-1:2}$ . It holds with probability at least*  
 1045  $1 - \exp(-c_6(d-2))$  *that*

$$\frac{\|W'_{d-1:2} - E\|_F}{\|E\|_F} \leq \sqrt{(k-1)} \exp(-c_5(d-2)),$$

1046 where  $c_5$  and  $c_6$  are the same constants as in Lemma 7.

1047 *Proof.* By the definition of Lyapunov exponents and Lemma 7 we have that with probability  $\geq$   
 1048  $1 - \exp(-c_6(d-2))$ , the following inequality holds for all  $t \geq 2$ :

$$\frac{s_{d-2,1}}{s_{d-2,t}} \geq \frac{s_{d-2,1}}{s_{d-2,2}} = \exp((d-2)(\lambda_{d-2,1} - \lambda_{d-2,2})) \geq \exp(c_5(d-2)),$$

1049 hence we obtain that

$$\frac{\|W'_{d-1:2} - E\|_F}{\|E\|_F} = \frac{\sqrt{\sum_{t=2}^k (s_{d-2,t})^2}}{s_{d-2,1}} \leq \frac{\sqrt{(k-1)(s_{d-2,2})^2}}{s_{d-2,1}} \leq \sqrt{(k-1)} \exp(c_5(d-2))$$

1050 as required.  $\square$

1051 We now show that not only  $W'_{d-1:2}$ , but also the end-to-end matrix  $W' = W'_d W'_{d-1:2} W'_1$  is approxi-  
 1052 mately rank one.

1053 **Lemma 9.** *There exist constants  $c_{11}, c_{12}, c_{13} > 0$  independent of  $d$  such that with probability at least*

$$1 - 2\frac{c_{12}}{d} - 2\frac{c_{11}}{d^{(k^2)}} - \exp(-c_{13}(d-2)),$$

1054 the product of unnormalized matrices  $W' := W'_d \cdot \dots \cdot W'_1$  can be written as

$$W' = O + R$$

1055 where  $O$  is a rank one matrix and

$$\frac{\|R\|_F}{\|O\|_F} \leq d^6 \sqrt{(k-1)} \exp(-c_5(d-2))$$

1056 for the constant  $c_5$  described in Lemma 8.

1057 *Proof.* We start from the decomposition obtained in Lemma 8, namely the decomposition

$$W'_{d-1:2} = E + (W'_{d-1:2} - E),$$

1058 where  $E$  has rank one and

$$\frac{\|W'_{d-1:2} - E\|_F}{\|E\|_F} \leq \sqrt{(k-1)} \exp(-c_5(d-2)),$$

1059 which holds with probability  $\geq 1 - \exp(-c_6(d-2))$ . Plugging into  $W'$  we obtain that

$$W' = W'_d W'_{d-1:2} W'_1 = W'_d E W'_1 + W'_d (W'_{d-1:2} - E) W'_1.$$

1060 Note that  $\text{rank}(W'_d E W'_1) = 1$  whenever  $W'_d E W'_1 \neq 0$ , which holds with probability 1. Now we can  
 1061 set  $O = W'_d E W'_1$  and  $R = W'_d (W'_{d-1:2} - E) W'_1$ . It therefore suffices to upper bound the ratio

$$\frac{\|W'_d (W'_{d-1:2} - E) W'_1\|_F}{\|W'_d E W'_1\|_F}.$$

1062 We will separately give an upper bound on

$$\|W'_d (W'_{d-1:2} - E) W'_1\|_F$$

1063 and a lower bound on

$$\|W'_d E W'_1\|$$

that hold simultaneously with high probability. First, note that by Lemmas 24 and 25, for a sufficiently large  $d$ , with probability  $\geq 1 - 2 \exp(-c_{10}d)$  it holds that

$$\begin{aligned} \|W'_d(W'_{d-1:2} - E)W'_1\|_F &\leq \|W'_d\|_F \|W'_1\|_F \|W'_{d-1:2} - E\|_F \\ &\leq d^2 \|W'_{d-1:2} - E\|_F. \end{aligned}$$

For the lower bound on  $\|W'_d E W'_1\|_F$ , consider the SVD decompositions of  $W'_d$  and  $W'_1$  given by

$$W'_1 = \sum_{t=1}^{r_1} \sigma_t^1 u_t^1 (v_t^1)^\top$$

and

$$W'_d = \sum_{t=1}^{r_d} \sigma_t^d u_t^d (v_t^d)^\top.$$

Likewise, as a rank one matrix,  $E$  can be written as

$$E = \|E\|_F u_E v_E^\top.$$

Invoking Lemma 26 with  $i = j = 1$  we obtain that

$$\|W'_d E W'_1\|_F \geq \|E\|_F \sigma_1^d \sigma_1^1 \langle v_1^d, u_E \rangle \langle v_E, u_1^1 \rangle.$$

It suffices to lower bound the absolute values of each of the terms in the product above. Note that by Lemma 27 all terms are independent. To lower bound  $\sigma_1^1$  and  $\sigma_1^d$  we apply Lemma 28 which yields that

$$\mathcal{P}\left(\sigma_1^1 \geq \frac{1}{d}\right) \geq 1 - \frac{c_{11}}{d^{(k^2)}}$$

and

$$\mathcal{P}\left(\sigma_1^d \geq \frac{1}{d}\right) \geq 1 - \frac{c_{11}}{d^{(k^2)}}$$

where  $c_{11}$  is the constant from Lemma 28. To lower bound  $|\langle v_1^d, u_E \rangle|$  and  $|\langle v_E, u_1^1 \rangle|$  we invoke Lemma 29 which yields that

$$\mathcal{P}\left(|\langle v_1^d, u_E \rangle| \geq \frac{1}{d}\right) \geq 1 - \frac{c_{12}}{d}$$

and

$$\mathcal{P}\left(|\langle v_E, u_1^1 \rangle| \geq \frac{1}{d}\right) \geq 1 - \frac{c_{12}}{d}$$

where  $c_{12}$  is the constant from Lemma 29. Hence by the union bound, with probability at least  $1 - 2\frac{c_{12}}{d} - 2\frac{c_{11}}{d^{(k^2)}}$  it holds that

$$\|W'_d E W'_1\|_F \geq \frac{1}{d^4} \|E\|_F.$$

Applying the union bound once more, we obtain that with probability at least

$$1 - 2\frac{c_{12}}{d} - 2\frac{c_{11}}{d^{(k^2)}} - \exp(-c_6(d-2)) - 2\exp(-c_{10}d)$$

the following holds:

$$\frac{\|W'_d(W'_{d-1:2} - E)W'_1\|_F}{\|W'_d E W'_1\|_F} \leq d^6 \sqrt{(k-1)} \exp(-c_5(d-2)).$$

The proof follows by choosing  $c_{13}$  such that

$$\exp(-c_{13}(d-2)) \geq \exp(-c_6(d-2)) + 2\exp(-c_{10}d).$$

□

Now that we've shown that  $W'$  can be approximated by a rank one matrix with high probability as  $d$  tends to infinity, we are ready to show this for the normalized matrix  $W = W'/\|W'\|_F$  as well.

1085 **Lemma 10.** *Let*

$$C(\gamma) := \{W : W = X + Y, \text{rank}(X) = 1, \|Y\|_F < \gamma\}.$$

1086 *Let  $C_{d,\gamma}$  be the event that  $\frac{W'}{\|W'\|_F} \in C(\gamma)$ . Then for any  $\gamma > 0$ , if*

$$\gamma \geq \frac{1}{|d^{-6}(k-1)^{-0.5} \exp(c_5(d-2)) - 1|}$$

1087 *then*

$$\mathcal{P}(C_{d,\gamma}) \geq 1 - 2\frac{c_{12}}{d} - 2\frac{c_{11}}{d^{(k^2)}} - \exp(-c_{13}(d-2)),$$

1088 *where  $c_{11}$ ,  $c_{12}$ , and  $c_{13}$  are the same constants as in Lemma 9.*

1089 *Proof.* By Lemma 9, with probability  $\geq 1 - 2\frac{c_{12}}{d} - 2\frac{c_{11}}{d^{(k^2)}} - \exp(-c_{13}(d-2))$  it holds that the  
1090 unnormalized matrix  $W'$  can be written as

$$W' = O + R,$$

1091 where  $O$  has rank one and

$$\frac{\|R\|_F}{\|O\|_F} \leq d^6 \sqrt{(k-1)} \exp(-c_5(d-2))$$

1092 from which it follows that

$$\frac{\|R\|_F}{\|W'\|_F} \leq \frac{\|R\|_F}{\|O\|_F - \|R\|_F} \leq \frac{1}{|d^{-6}(k-1)^{-0.5} \exp(c_5(d-2)) - 1|}.$$

1093 Consider the normalized matrix  $W'/\|W'\|_F$  and its best rank one approximation denoted as  $X$ . Then,  
1094 it holds that

$$\left\| \frac{W'}{\|W'\|_F} - X \right\|_F \leq \frac{\|W' - O\|_F}{\|W'\|_F} = \frac{\|R\|_F}{\|W'\|_F} \leq \frac{1}{|d^{-6}(k-1)^{-0.5} \exp(c_5(d-2)) - 1|} \leq \gamma.$$

1095 as required.  $\square$

## 1096 **B.2 If $W$ is Close to Rank One Then Low Training Loss Ensures Low Generalization Loss**

1097 In this appendix, we show that if the RIP holds and a learned matrix  $W$  is close enough to a rank  
1098 one matrix, achieving low training loss ensures low generalization loss. This is formally stated in the  
1099 Lemma below.

1100 **Lemma 11.** *Suppose that the measurement matrices  $(A_i)_{i=1}^n$  satisfy the RIP of order 1 (see Defini-  
1101 tion 1) with a constant  $\delta \in (0, 1)$  and  $\mathcal{A}$  is defined as in Definition 1. Suppose that there exists some  
1102 constant  $b > 0$  such that for any matrix  $M \in \mathbb{R}^{m,m'}$  it holds that*

$$\|\mathcal{A}(M)\|_F \leq b\|M\|_F.$$

1103 *Let  $M \in \mathbb{R}^{m,m'}$  be a matrix such that*

$$\|\mathcal{A}(M)\|_F^2 \leq \epsilon,$$

1104 *and suppose that*

$$M = E + R,$$

1105 *where  $\text{rank}(E) \leq 1$ . If*

$$\|R\|_F \leq \frac{\sqrt{1-\delta}(\sqrt{2}-1)\sqrt{\epsilon}}{1+b\sqrt{1-\delta}},$$

1106 *then*

$$\|M\|_F^2 \leq \frac{2\epsilon}{1-\delta}.$$



1107 *Proof.* By the definition of  $\mathcal{A}$  it holds that

$$\mathcal{A}(E) = \mathcal{A}(M) - \mathcal{A}(R),$$

1108 therefore, using the triangle inequality we obtain that

$$\|\mathcal{A}(E)\|_F \leq \|\mathcal{A}(M)\|_F + \|\mathcal{A}(R)\|_F \leq \sqrt{\epsilon} + b\|R\|_F.$$

1109 By the RIP, the above results in

$$\|E\|_F \leq (1 - \delta)^{-\frac{1}{2}} (\sqrt{\epsilon} + b\|R\|_F).$$

1110 Finally, we obtain by the triangle inequality that

$$\|M\|_F \leq (1 - \delta)^{-\frac{1}{2}} (\sqrt{\epsilon} + b\|R\|_F) + \|R\|_F.$$

1111 The proof follows by plugging the assumption on  $\|R\|_F$  and rearranging.  $\square$

### 1112 B.3 Lower Bounds on the Probability of Low Training Loss

1113 In this Appendix, we show that the probability of attaining low training loss is bounded from below  
1114 as  $d$  tends to infinity. The argument is formally stated in the next Lemma.

1115 **Lemma 12.** Suppose that  $W^*$  has rank one and that  $\|W^*\|_F = 1$ . Then for any  $\epsilon > 0$  it holds that

$$\mathcal{P}(\mathcal{L}_{\text{train}}(W) < \epsilon) \geq \Omega(1)$$

1116 as  $d \rightarrow \infty$ .

1117 *Proof.* By the law of total probability we have that

$$\mathcal{P}(\mathcal{L}_{\text{train}}(W) < \epsilon) \geq \mathcal{P}(\mathcal{L}_{\text{train}}(W) < \epsilon \mid C_{d,\gamma}) \cdot \mathcal{P}(C_{d,\gamma}),$$

1118 where  $C_{d,\gamma}$  is as defined in Lemma 10. Additionally, By Lemma 10 it holds that

$$\lim_{d \rightarrow \infty} \mathcal{P}(C_{d,\gamma}) = 1.$$

1119 It therefore suffices to show that

$$\mathcal{P}(\mathcal{L}_{\text{train}}(W) < \epsilon \mid C_{d,\gamma}) \geq \Omega(1).$$

1120 as  $d \rightarrow \infty$ . Observe that

$$\mathcal{P}(\mathcal{L}_{\text{train}}(W) < \epsilon \mid C_{d,\gamma}) \geq \mathcal{P}(\|W - W^*\|_F^2 < \frac{\epsilon}{b} \mid C_{d,\gamma}),$$

1121 where  $b$  is the Lipschitz constant of  $\mathcal{A}$  as defined in Lemma 11. Thus it suffices to lower bound the  
1122 latter probability. By the symmetry of the Gaussian distribution (see Lemma 27) and the symmetry  
1123 of the event  $C_{d,\gamma}$  we have that for any  $c > 0$  the following holds for any rank one matrix  $E$  with  
1124  $\|E\|_F = 1$ :

$$\mathcal{P}(\|W - W^*\|_F^2 < \frac{\epsilon}{b} \mid C_{d,\gamma}) = \mathcal{P}(\|W - E\|_F^2 < \frac{\epsilon}{b} \mid C_{d,\gamma}).$$

1125 Now we set  $\gamma = \epsilon/2b$  and consider the  $M := M(\frac{\epsilon}{2b}, d)$  matrices  $E_1, \dots, E_M$  from Lemma 30. By  
1126 the triangle inequality and the union bound we have that

$$\begin{aligned} 1 &= \mathcal{P}(C_{d,\gamma} \mid C_{d,\gamma}) \\ &= \mathcal{P}\left(\bigcup_{1 \leq i \leq M} \left\{W ; \|W - E_i\|_F^2 < \frac{\epsilon}{b}\right\} \mid C_{d,\gamma}\right) \\ &\leq \sum_{1 \leq i \leq M} \mathcal{P}\left(\left\{W ; \|W - E_i\|_F^2 < \frac{\epsilon}{b}\right\} \mid C_{d,\gamma}\right). \end{aligned}$$

1127 Now again by symmetry we have

$$\sum_{1 \leq i \leq M} \mathcal{P}\left(\left\{W ; \|W - E_i\|_F^2 < \frac{\epsilon}{b}\right\} \mid C_{d,\gamma}\right) = M \cdot \mathcal{P}\left(\left\{W : \|W - W^*\|_F^2 < \frac{\epsilon}{b}\right\} \mid C_{d,\gamma}\right).$$

1128 Therefore, we conclude that

$$\mathcal{P}\left(\left\{W : \|W - W^*\|_F^2 < \frac{\epsilon}{b}\right\} \mid C_{d,\gamma}\right) \geq \frac{1}{M}$$

1129 as required.  $\square$

## 1130 B.4 Proof of Sought-After Result

1131 We are now ready to prove Theorem 2. Let us define  $C_{d,\gamma}$  as in Lemma 10. For convenience we will  
 1132 denote by  $G_{d,c}$  the event that  $\mathcal{L}_{\text{gen}}(W) < c\epsilon$ , and by  $L_d$  the event that  $\mathcal{L}_{\text{train}}(W) < \epsilon$ . By the law of  
 1133 total probability it holds that

$$\mathcal{P}(G_{d,c}|L_d) \geq \frac{\mathcal{P}(G_{d,c} \cap L_d \cap C_{d,\gamma})}{\mathcal{P}(L_d)}.$$

1134 By Lemma 11, if we set

$$\gamma = \frac{\sqrt{1-\delta}(\sqrt{2}-1)\sqrt{\epsilon}}{1+b\sqrt{1-\delta}}$$

1135 where  $b$  is the Lipschitz constant of  $\mathcal{A}$ , and

$$c = \frac{2}{1-\delta},$$

1136 then we obtain that

$$G_{d,c} \cap L_d \cap C_{d,\gamma} \subseteq L_d \cap C_{d,\gamma}.$$

1137 Hence,

$$\mathcal{P}(G_{d,c}|L_d) \geq \frac{\mathcal{P}(L_d \cap C_{d,\gamma})}{\mathcal{P}(L_d)} = 1 - \frac{\mathcal{P}(L_d \cap C_{d,\gamma}^C)}{\mathcal{P}(L_d)} \geq 1 - \frac{\mathcal{P}(C_{d,\gamma}^C)}{\mathcal{P}(L_d)}.$$

1138 By Lemma 10, for large enough  $d$  it holds that

$$\mathcal{P}(C_{d,\gamma}^C) < 2\frac{c_{12}}{d} + 2\frac{c_{11}}{d^{(k^2)}} + \exp(-c_6(d-2)) = O(1/d).$$

1139 By Lemma 12,  $\mathcal{P}(L_d) = \Omega(1)$  and so

$$\lim_{d \rightarrow \infty} \mathcal{P}(G_{d,c}|L_d) = 1 - O(1/d)$$

1140 completing the proof.  $\square$

## 1141 C Increasing Width with Unspecified $\epsilon_{\text{train}}$

1142 Theorem 1 requires the G&C training loss threshold  $\epsilon_{\text{train}}$  to be specified. Thus, the theorem does  
 1143 not rule out the possibility that for any width, a sufficiently small  $\epsilon_{\text{train}}$  will lead G&C to attain good  
 1144 generalization. In this appendix, we state and prove a result—Theorem 9 below—that allows for an  
 1145 unspecified  $\epsilon_{\text{train}}$ . Theorem 9 imposes assumptions beyond those of Theorem 1: (i) the depth of the  
 1146 matrix factorization is two; (ii) the prior distribution is generated by a zero-centered Gaussian; (iii) the  
 1147 activation is linear; and (iv) the factorization is square, i.e.,  $m = m'$  (though this latter assumption  
 1148 can easily be lifted). Moreover, Theorem 9 considers a case in which the prior-induced probability  
 1149 distribution of the factorized matrix  $W$  (Equation (4)) is shifted such that its mean is the ground truth  
 1150 matrix  $W^*$ . The theorem establishes that even with this shift—which makes good generalization  
 1151 easier to attain—the posterior probability of low generalization loss conditioned on low training loss  
 1152 converges to the prior probability of low generalization loss.

1153 **Theorem 9.** *Let  $m, k \in \mathbb{N}$  and let  $\epsilon_{\text{gen}} > 0$ . Let  $W_1$  and  $W_2$  be random matrices of dimensions  $m, k$   
 1154 and  $k, m$ , respectively. Assume that the entries of both  $W_1$  and  $W_2$  are drawn independently from  
 1155  $\mathcal{N}(0, 1)$ . Consider the normalized product which is then centered around the ground truth matrix  
 1156  $W^*$ , i.e.:*

$$W := \frac{1}{\sqrt{mk}} W_1 W_2 + W^*.$$

1157 *Then, it holds that:*

$$\lim_{k \rightarrow \infty} \sup_{\epsilon_{\text{train}} > 0} \mathcal{P}(\mathcal{L}_{\text{gen}}(W) < \epsilon_{\text{gen}} \mid \mathcal{L}_{\text{train}}(W) < \epsilon_{\text{train}}) - \mathcal{P}(\mathcal{L}_{\text{gen}}(W) < \epsilon_{\text{gen}}) = 0.$$

1158 *Proof.* The proof is delivered by Appendices C.1 to C.4 below. Appendix C.1 establishes that locally  
 1159 uniform convergence of densities implies convergence of probabilities. Appendix C.2 calculates the  
 1160 characteristic function of the factorized matrix  $W$ . Appendix C.3 establishes that the conditional  
 1161 probabilities in Theorem 9 can be approximated by conditional probabilities of bounded sets. Finally,  
 1162 Appendix C.4 combines the above to prove the sought-after result.  $\square$

## 1163 C.1 Locally Uniform Convergence of Densities Implies Convergence of Probabilities

1164 Convergence of probability measures in convex distance, as in Appendix A, is not sufficient for  
 1165 proving a results which deal directly with the case of unspecified  $\epsilon_{\text{train}}$ . This is so because the  
 1166 denominator and the numerator of the conditional probability can be arbitrarily small, and the convex  
 1167 distance gives an additive approximation guarantee. To prove such a result we will first have to prove  
 1168 that a stronger notion of convergence which we introduce in this Appendix holds in our case.

1169 **Theorem 10.** *Suppose that  $G_n$  and  $G$  have continuous densities  $g_n$  and  $g$  (with respect to Lebesgue  
 1170 measure) on  $\mathbb{R}^m$ . Suppose that  $G_n \xrightarrow{\text{dist.}} G$ , the densities  $g_n$  are uniformly bounded, i.e., there  
 1171 exists  $M : \mathbb{R}^m \rightarrow \mathbb{R}$  such that*

$$\forall \mathbf{x} \in \mathbb{R}^m, \quad \sup_{n \in \mathbb{N}} |g_n(\mathbf{x})| \leq M(\mathbf{x}) < \infty,$$

1172 *and  $g_n$  are also equicontinuous, i.e., for each  $\epsilon > 0$  there exists  $\delta(\epsilon)$  such that if  $\|\mathbf{x} - \mathbf{y}\|_2 < \delta(\epsilon)$   
 1173 then*

$$\forall n \in \mathbb{N}, \quad |g_n(\mathbf{x}) - g_n(\mathbf{y})| < \epsilon.$$

1174 *Then*

$$\lim_{n \rightarrow \infty} \sup_{\mathbf{x} \in \mathbb{R}^m} |g_n(\mathbf{x}) - g(\mathbf{x})| \rightarrow 0.$$

1175 *Proof.* This is a slight adaptation of Lemma 1 in Boos [13]. □

1176 **Lemma 13.** *Let  $\{f_n\}_{n \in \mathbb{N}}$  be a family of probability densities on  $\mathbb{R}^m$  with respective characteristic  
 1177 functions  $\varphi_n(\mathbf{t})$  (Definition 11). Suppose that the  $L^1$ -norms of the characteristic functions weighted  
 1178 by  $\|\mathbf{t}\|_2$  are uniformly bounded, i.e.,*

$$\forall n \in \mathbb{N}, \quad \int_{\mathbb{R}^m} \|\mathbf{t}\|_2 \cdot |\varphi_n(\mathbf{t})| d\mathbf{t} \leq M,$$

1179 *where  $M > 0$  is a constant independent of  $n$ . Then the family  $f_n$  is uniformly bounded and  
 1180 equicontinuous.*

1181 *Proof.* Note that the above bound implies that there also exists some  $\hat{M} > 0$  independent of  $n$  such  
 1182 that

$$\forall n \in \mathbb{N}, \quad \int_{\mathbb{R}^m} |\varphi_n(\mathbf{t})| d\mathbf{t} \leq \hat{M}.$$

1183 We employ the decomposition

$$\int_{\mathbb{R}^m} |\varphi_n(\mathbf{t})| d\mathbf{t} = \int_{\|\mathbf{t}\|_2 \leq 1} |\varphi_n(\mathbf{t})| d\mathbf{t} + \int_{\|\mathbf{t}\|_2 \geq 1} |\varphi_n(\mathbf{t})| d\mathbf{t}.$$

1184 The first summand is uniformly bounded for all  $n$  because the integrand is at most 1 (any charactersitic  
 1185 function satisfies  $|\phi(\mathbf{t})| \leq \mathbb{E}(|\exp(i \langle \mathbf{t}, X \rangle)|) = 1$ ) and the domain has finite volume, whereas the  
 1186 second summand is upper bounded by

$$\int_{\|\mathbf{t}\|_2 \geq 1} \|\mathbf{t}\|_2 \cdot |\varphi_n(\mathbf{t})| d\mathbf{t} \leq \int_{\mathbb{R}^m} \|\mathbf{t}\|_2 \cdot |\varphi_n(\mathbf{t})| d\mathbf{t} \leq M.$$

1187 It now follows by Lemma 32 that for any  $\mathbf{x} \in \mathbb{R}^m$

$$\sup_{n \in \mathbb{N}} |f_n(\mathbf{x})| \leq \sup_{n \in \mathbb{N}, \mathbf{y} \in \mathbb{R}^m} |f_n(\mathbf{y})| \leq \frac{1}{(2\pi)^m} \hat{M}.$$

1188 It remains to verify that  $\{f_n\}_{n \in \mathbb{N}}$  are equicontinuous. To see this, note that by Lemma 33 :

$$|f_n(\mathbf{x}) - f_n(\mathbf{y})| \leq \frac{\|\mathbf{x} - \mathbf{y}\|_2}{(2\pi)^m} \int_{\mathbb{R}^m} \|\mathbf{t}\|_2 \cdot |\varphi_n(\mathbf{t})| d\mathbf{t} \leq \frac{\|\mathbf{x} - \mathbf{y}\|_2}{(2\pi)^m} M.$$

1189 This bound is uniform in  $n$  and depends only on the distance  $\|\mathbf{x} - \mathbf{y}\|_2$ . For any given  $\epsilon > 0$ , choose  
 1190  $\delta(\epsilon) = \frac{(2\pi)^m \epsilon}{M}$ . Then for all  $\|\mathbf{x} - \mathbf{y}\|_2 < \delta(\epsilon)$ , we have:

$$\forall n \in \mathbb{N}, \quad |f_n(\mathbf{x}) - f_n(\mathbf{y})| < \epsilon.$$

1191 Thus, the family  $\{f_n\}_{n \in \mathbb{N}}$  is equicontinuous. □

1192 **Lemma 14.** Let  $\{f_n\}_{n \in \mathbb{N}}$  be a sequence of probability density functions on  $\mathbb{R}^m$  that converges  
 1193 uniformly to a limit density  $f$ . Suppose that  $f$  is positive and smooth on  $\mathbb{R}^m$ . For any bounded set  
 1194  $K \subset \mathbb{R}^m$  such that  $K \subseteq B(0, R)$ , the ratio of probabilities assigned by  $f_n$  and  $f$  to  $K$  converges to  
 1195 1, i.e.,

$$\lim_{n \rightarrow \infty} \frac{\int_K f_n(\mathbf{x}) d\mathbf{x}}{\int_K f(\mathbf{x}) d\mathbf{x}} \rightarrow 1.$$

1196 furthermore, this convergence is uniform over all subsets contained in  $B(0, R)$ .

1197 *Proof.* The positivity and smoothness of  $f$  imply that  $f$  is bounded below on bounded sets—indeed,  
 1198  $K$  is contained in  $B(0, R)$  on which  $f$  is bounded from below. That is, there exists a constant  $c > 0$   
 1199 such that for all  $\mathbf{x} \in B(0, R)$  it holds that

$$f(\mathbf{x}) \geq c.$$

1200 Since  $f_n \rightarrow f$  uniformly on  $\mathbb{R}^m$ , for any  $\epsilon > 0$  there exists  $N \in \mathbb{N}$  such that for all  $n \geq N$  and all  
 1201  $\mathbf{x} \in K$  it holds that

$$|f_n(\mathbf{x}) - f(\mathbf{x})| < c\epsilon \leq \epsilon f(\mathbf{x}).$$

1202 Thus, we can bound  $f_n(\mathbf{x})$  as:

$$(1 - \epsilon)f(\mathbf{x}) \leq f_n(\mathbf{x}) \leq (1 + \epsilon)f(\mathbf{x}).$$

1203 Integrating this inequality over  $K$ , we obtain

$$(1 - \epsilon) \int_K f(\mathbf{x}) d\mathbf{x} \leq \int_K f_n(\mathbf{x}) d\mathbf{x} \leq (1 + \epsilon) \int_K f(\mathbf{x}) d\mathbf{x}.$$

1204 Dividing through by  $\int_K f(\mathbf{x}) d\mathbf{x}$  (which is strictly positive since  $f > 0$  and  $K$  is compact), we obtain  
 1205 that

$$1 - \epsilon \leq \frac{\int_K f_n(\mathbf{x}) d\mathbf{x}}{\int_K f(\mathbf{x}) d\mathbf{x}} \leq 1 + \epsilon.$$

1206 Taking the limit as  $n \rightarrow \infty$ , we conclude:

$$\frac{\int_K f_n(\mathbf{x}) d\mathbf{x}}{\int_K f(\mathbf{x}) d\mathbf{x}} \rightarrow 1.$$

1207 Furthermore, the above convergence does not depend on  $K$  itself but only on  $B(0, R)$ , hence the  
 1208 convergence is uniform over all subsets contained in  $B(0, R)$ .  $\square$

## 1209 C.2 Calculation of Characteristic Function

1210 To apply the results of the previous subsection, we need to calculate the characteristic function so  
 1211 that we can bound its integral as in Lemma 16. We begin with the following formula.

1212 **Lemma 15.** Given the random variable  $W = \frac{1}{\sqrt{mk}} W_1 W_2$ , where  $W_1, W_2^\top \in \mathbb{R}^{m,k}$  are matrices  
 1213 with independent standard Gaussian entries, the characteristic function  $\hat{f}_k(T) = \mathbb{E}[e^{i\langle T, W \rangle}]$  for  
 1214  $T \in \mathbb{R}^{m,m}$  is given by:

$$\hat{f}_k(T) = \left( \frac{1}{\sqrt{\det \left( I_m + \frac{TT^\top}{km} \right)}} \right)^k.$$

1215 *Proof.* Since for any random variable  $X$  and constant  $c \in \mathbb{R}$  we have

$$\hat{f}_{cX}(T) = \hat{f}_X(cT),$$

1216 it suffices to compute the characteristic function without the  $\frac{1}{\sqrt{mk}}$  factor, which we denote by  $\hat{f}$ . We  
 1217 have that

$$\begin{aligned}\langle T, W \rangle &= \sum_{i=1}^m \sum_{j=1}^m T_{ij} W_{ij} \\ &= \sum_{i=1}^m \sum_{j=1}^m T_{ij} \sum_{p=1}^k W_{ip}^{(1)} W_{pj}^{(2)} \\ &= \sum_{i=1}^m \sum_{j=1}^m \sum_{p=1}^k T_{ij} W_{ip}^{(1)} W_{pj}^{(2)} \\ &= \sum_{p=1}^k \sum_{j=1}^m W_{pj}^{(2)} \sum_{i=1}^m T_{ij} W_{ip}^{(1)}.\end{aligned}$$

1218 Note that the variables

$$\sum_{j=1}^m W_{pj}^{(2)}, \quad \sum_{i=1}^m T_{ij} W_{ip}^{(1)}$$

1219 are independent for distinct values of  $p$ , hence

$$\hat{f}_k(T) = \prod_{p=1}^k \mathbb{E}_{W_{ip}^{(1)}, W_{pj}^{(2)}} \left[ \exp \left( i \sum_{j=1}^m W_{pj}^{(2)} \sum_{i=1}^m T_{ij} W_{ip}^{(1)} \right) \right].$$

1220 To evaluate the above expression we first fix  $W_{pj}^{(2)}$ , *i.e.*, we consider the expectation

$$\mathbb{E}_{W_{ip}^{(1)}} \left[ \exp \left( i \sum_{j=1}^m W_{pj}^{(2)} \sum_{i=1}^m T_{ij} W_{ip}^{(1)} \right) \right].$$

1221 Let  $Z \in \mathbb{R}^m$  such that  $(Z)_j := \sum_{i=1}^m T_{ij} W_{ip}^{(1)}$ . Note that  $Z$  is a Gaussian random variable (being a  
 1222 linear combination of Gaussian random variables) with mean zero and covariance

$$(\Sigma_Z)_{pl} = \langle T_p, T_l \rangle,$$

1223 where  $T_p, T_l \in \mathbb{R}^m$  are the  $p$ th and  $l$ th rows of the matrix  $T$ , respectively. Therefore by the formula  
 1224 for the characteristic function of a Gaussian variable (see Lemma 34) we obtain

$$\mathbb{E}_{W_{ip}^{(1)}} \left[ \exp \left( i \sum_{j=1}^m W_{pj}^{(2)} \sum_{i=1}^m T_{ij} W_{ip}^{(1)} \right) \right] = \exp \left( -0.5 \left\langle W_p^{(2)}, \Sigma_Z W_p^{(2)} \right\rangle \right),$$

1225 where  $W_p^{(2)} \in \mathbb{R}^m$  is the vector whose  $j$ th entry is  $W_{pj}^{(2)}$ . It remains now to evaluate this expectation  
 1226 with respect to  $W_p^{(2)}$  as well. Thus our task reduces to evaluating the expectation, with respect to a  
 1227 standard Gaussian, of a function of the form

$$\exp \left( -0.5 \left\langle W_p^{(2)}, \Sigma_Z W_p^{(2)} \right\rangle \right)$$

1228 where  $\Sigma$  is PSD. We now apply Lemma 35 to obtain the formula:

$$\mathbb{E}_{W_p^{(2)}} \left[ \exp \left( -0.5 \left\langle W_p^{(2)}, \Sigma_Z W_p^{(2)} \right\rangle \right) \right] = \frac{1}{\sqrt{\det(I_m + \Sigma)}} = \frac{1}{\sqrt{\det(I_m + TT^\top)}}$$

1229 where the second equality uses the definition of  $\Sigma$ . It follows that

$$\hat{f}_k(T) = \hat{f} \left( \frac{T}{\sqrt{k}} \right) = \left( \frac{1}{\sqrt{\det \left( I_m + \frac{TT^\top}{km} \right)}} \right)^k$$

1230 as required. □

1231 We are now ready to show that the integrals of the characteristic functions  $\hat{f}_k$  are bounded, even if  
 1232 multiplied by  $\|T\|_F$ , which will allow us to derive the equicontinuity of the corresponding densities.

1233 **Lemma 16.** For  $\hat{f}_k$  defined in Lemma 15 it holds that

$$\sup_{k \in \mathbb{N}} \int_{\mathbb{R}^{m,m}} \|T\|_F \cdot |\hat{f}_k(T)| dT < \infty.$$

1234 *Proof.* Recall that by Lemma 15 above it holds that

$$\int_{\mathbb{R}^{m,m}} \|T\|_F |\hat{f}_k(T)| dT = \int_{\mathbb{R}^{m,m}} \|T\|_F \left( \frac{1}{\sqrt{\det(I_m + \frac{TT^\top}{km})}} \right)^k dT.$$

1235 Using the change of variables to singular values and the Vandermonde determinant (Corollary 3), we  
 1236 may write the above as

$$\begin{aligned} & \int_{\mathbb{R}^{m,m}} \|T\|_F \left( \frac{1}{\sqrt{\det(I_m + \frac{TT^\top}{km})}} \right)^k dT \\ &= C_m \int_{\mathbb{R}_+^m} \left( \sum_{p=1}^m \sigma_p^2 \right)^{1/2} \cdot \left( \frac{1}{\prod_{i=1}^m \sqrt{1 + \frac{\sigma_i^2}{km}}} \right)^k \prod_{1 \leq i < j \leq m} (\sigma_i^2 - \sigma_j^2) d\sigma \end{aligned}$$

1237 where  $C_m$  is a constant depending on the dimension  $m$ . Using the elementary bound

$$\prod_{1 \leq i < j \leq m} (\sigma_i^2 - \sigma_j^2) \leq \prod_{i=1}^m \sigma_i^{2(m-i)}$$

1238 we obtain the following upper inequality

$$\begin{aligned} & \int_{\mathbb{R}_+^m} \left( \sum_{p=1}^m \sigma_p^2 \right)^{1/2} \cdot \left( \frac{1}{\prod_{i=1}^m \sqrt{1 + \frac{\sigma_i^2}{km}}} \right)^k \prod_{1 \leq i < j \leq m} (\sigma_i^2 - \sigma_j^2) d\sigma \\ & \leq C_m \int_{\mathbb{R}_+^m} \left( \sum_{p=1}^m \sigma_p^2 \right)^{1/2} \cdot \left( \frac{1}{\prod_{i=1}^m \sqrt{1 + \frac{\sigma_i^2}{km}}} \right)^k \prod_{i=1}^m \sigma_i^{2(m-i)} d\sigma. \end{aligned}$$

1239 Now we apply the inequality  $\sqrt{a+b} \leq \sqrt{a} + \sqrt{b}$  to the Frobenius norm term:

$$\left( \sum_{p=1}^m \sigma_p^2 \right)^{1/2} \leq \sum_{p=1}^m \sqrt{\sigma_p^2}.$$

1240 This separates the sum into individual terms:

$$\sum_{p=1}^m \int_{\mathbb{R}_+^m} \sigma_p \cdot \left( \frac{1}{\prod_{i=1}^m \sqrt{1 + \frac{\sigma_i^2}{km}}} \right)^k \prod_{i=1}^m \sigma_i^{2(m-i)} d\sigma.$$

1241 Using Fubini's Theorem, the integral separates into a sum over  $m$  products of individual integrals:

$$\sum_{p=1}^m \prod_{\substack{i=1 \\ i \neq p}}^m \int_0^\infty \left( \frac{1}{\sqrt{1 + \frac{\sigma_i^2}{km}}} \right)^k \sigma_i^{2(m-i)} d\sigma_i \cdot \int_0^\infty \left( \frac{1}{\sqrt{1 + \frac{\sigma_p^2}{km}}} \right)^k \sigma_p^{2(m-p)+1} d\sigma_p.$$

1242 This decomposition allows the integral to be expressed as a sum of  $m$  factorized integrals, each  
 1243 involving a single variable.

1244 We now perform for each  $1 \leq i \leq m$  the change of variable  $x_i = \frac{\sigma_i}{\sqrt{km}}$ , which gives  $dx_i = \frac{d\sigma_i}{\sqrt{km}}$   
 1245 and overall

$$\begin{aligned} M_m \sum_{p=1}^m k^{\frac{m}{2}} k^{\sum_{i=1}^m (m-i)} k^{\frac{1}{2}} \prod_{\substack{i=1 \\ i \neq p}}^m \int_0^\infty \left( \frac{1}{\sqrt{1+x_i^2}} \right)^k x_i^{2(m-i)} dx_i \cdot \int_0^\infty \left( \frac{1}{\sqrt{1+x_p^2}} \right)^k x_p^{2(m-p)+1} dx_p \\ = M_m \sum_{p=1}^m k^{\frac{m}{2} + \frac{1}{2}} \prod_{\substack{i=1 \\ i \neq p}}^m \int_0^\infty \left( \frac{1}{\sqrt{1+x_i^2}} \right)^k x_i^{2(m-i)} dx_i \cdot \int_0^\infty \left( \frac{1}{\sqrt{1+x_p^2}} \right)^k x_p^{2(m-p)+1} dx_p, \end{aligned}$$

1246 where we have again absorbed the multiplicative dependence on  $m$  (which remains constant through-  
 1247 out our analysis) into a constant  $M_m$ .

1248 We now perform another change of variables  $x_i^2 = y_i$ , which gives  $2x_i dx_i = dy_i$ . Overall for  $i \neq p$   
 1249 we get a factor of

$$\frac{1}{2} \int_0^\infty \frac{1}{(1+y_i)^{\frac{k}{2}}} y_i^{m-i-\frac{1}{2}} dy_i$$

1250 and for  $i = p$  a factor of

$$\frac{1}{2} \int_0^\infty \frac{1}{(1+y_p)^{\frac{k}{2}}} y_i^{m-p} dy_i.$$

1251 It remains to examine the asymptotics of these expressions for large  $k$ . To do this we note that by the  
 1252 definition of the Beta function (Definition 12), we have that

$$\int_0^\infty \frac{1}{(1+y_i)^{\frac{k}{2}}} y_i^{m-i-\frac{1}{2}} dy_i = B\left(m-i+\frac{1}{2}, \frac{k}{2} - \left(m-i+\frac{1}{2}\right)\right)$$

1253 and by Lemma 37 we have

$$B\left(m-i+\frac{1}{2}, \frac{k}{2} - \left(m-i+\frac{1}{2}\right)\right) = \frac{\Gamma\left(m-i+\frac{1}{2}\right) \Gamma\left(\frac{k}{2} - \left(m-i+\frac{1}{2}\right)\right)}{\Gamma\left(\frac{k}{2}\right)},$$

1254 where  $\Gamma(\cdot)$  is the Gamma function (Definition 10). By Lemma 38 the above is of order  $k^{-(m-i+\frac{1}{2})}$ .  
 1255 The same calculation gives for  $i = p$  a term of order  $k^{-(m-p+1)}$ . Summing these terms we get that  
 1256 the product is of order

$$k^{-(\frac{m}{2} + \frac{m(m-1)}{2} + \frac{1}{2})} = k^{-(\frac{m^2}{2} + \frac{1}{2})}.$$

1257 Overall, the terms dependent on  $k$  cancel and each of the  $m$  integrals remain bounded as  $k \rightarrow \infty$ , as  
 1258 required.  $\square$

1259 We summarize the above discussion by the following Lemma.

1260 **Lemma 17.** Let  $W_1, (W_2)^\top \in \mathbb{R}^{m,k}$  be matrices with entries drawn independently from  $\mathcal{N}(0, 1)$ ,  
 1261 and let  $W = \frac{1}{\sqrt{mk}} W_1 W_2$ . For any bounded set  $K \subseteq B(0, R) \subseteq \mathbb{R}^{m,m}$  we have

$$\lim_{k \rightarrow \infty} \frac{\mathcal{P}(W \in K)}{\mathcal{P}(W_{\text{id}} \in K)} \rightarrow 1,$$

1262 where  $W_{\text{id}} \in \mathbb{R}^{m,m}$  is a matrix with entries drawn independently from  $N(0, \frac{1}{m})$ , and furthermore  
 1263 this convergence is uniform over all subsets  $K \subseteq B(0, R)$ .

1264 *Proof.* By Theorem 11,  $W$  converges as  $k \rightarrow \infty$  to  $W_{\text{id}}$  in total variation distance, and hence also in  
 1265 distribution. Combining this with Lemmas 13 and 16 implies that the conditions of Theorem 10 are  
 1266 satisfied. Clearly the limiting density, being a product of Gaussian densities, is smooth and positive.  
 1267 Hence the conclusion is a consequence of Lemma 14.  $\square$

### 1268 C.3 Approximation by Conditional Probabilities of Bounded Sets

1269 We would ultimately like to bound conditional probabilities involving the events  $\{\mathcal{L}_{\text{gen}}(W) < \epsilon_{\text{gen}}\}$   
 1270 and  $\{\mathcal{L}_{\text{train}}(W) < \epsilon_{\text{train}}\}$ . Unfortunately, Lemma 14 applies only to bounded subsets of  $R^{m,m}$ , and  
 1271 the events above are unbounded. We will circumvent this difficulty by intersecting  $\{\mathcal{L}_{\text{gen}}(W) < \epsilon_{\text{gen}}\}$   
 1272 with  $B(0, R)$ , for sufficiently large  $R$ , and arguing that the approximations thus obtained are suffi-  
 1273 ciently precise. Specifically, we have the following Lemma.

1274 **Lemma 18.** *Let  $B_R(V)$  be the event that a random matrix  $V$  is contained in an open ball of radius*  
 1275  *$R$  around the origin*

$$B_R(V) := \{V \in B(0, R)\}$$

1276 *It holds that*

$$\lim_{R \rightarrow \infty} \sup_{k \in \mathbb{N}, \epsilon > 0} |\mathcal{P}(B_R(W) \mid \mathcal{L}_{\text{train}}(W) < \epsilon_{\text{train}}) - 1| = 0.$$

1277 *Proof.* To see this, we first note that by the law of total probability

$$\begin{aligned} & \mathcal{P}(B_R(W) \mid \mathcal{L}_{\text{train}}(W) < \epsilon_{\text{train}}) \\ &= \int_{\mathbb{R}^{k,m}} \mathcal{P}(B_R(W) \mid \mathcal{L}_{\text{train}}(W) < \epsilon_{\text{train}}, W_2) f(W_2 \mid \mathcal{L}_{\text{train}}(W) < \epsilon_{\text{train}}) dW_2, \end{aligned}$$

1278 where  $f(W_2 \mid \mathcal{L}_{\text{train}}(W) < \epsilon_{\text{train}})$  is the conditional density of  $W_2$  given  $\mathcal{L}_{\text{train}}(W) < \epsilon_{\text{train}}$ . Now note  
 1279 that given  $W_2$  we have that  $W = \frac{1}{\sqrt{mk}} W_1 W_2$  is a zero-centered Gaussian random variable (with a  
 1280 covariance matrix which depends on  $W_2$ ). Furthermore the set  $\{W_1 : \mathcal{L}_{\text{train}}(W) < \epsilon_{\text{train}}\}$  is convex  
 1281 and since  $W^* = 0$  it is also symmetric. Furthermore, the set  $B(0, R)$  is convex and symmetric for  
 1282 any  $R$ . We can therefore apply the Gaussian Correlation inequality (Lemma 39) to conclude that

$$\mathcal{P}(B_R(W) \mid \mathcal{L}_{\text{train}}(W) < \epsilon_{\text{train}}, W_2) \geq \mathcal{P}(B_R(W) \mid W_2)$$

1283 and therefore

$$\mathcal{P}(B_R(W) \mid \mathcal{L}_{\text{train}}(W) < \epsilon_{\text{train}}) \geq \int_{\mathbb{R}^{k,m}} \mathcal{P}(B_R(W) \mid W_2) f(W_2 \mid \mathcal{L}_{\text{train}}(W) < \epsilon_{\text{train}}) dW_2. \quad (8)$$

1284 Let  $W_{2,:j}$  be the  $j$ th column of  $W_2$ . Consider the following set:

$$\hat{R}(c) := \left\{ W_2 : \forall i \in [m], \|W_{2,:j}\|_2 \leq c\sqrt{k} \right\}.$$

1285 This set is convex and symmetric, so we can again apply the law of total probability by conditioning  
 1286 on  $W_1$  to get

$$\begin{aligned} & \mathcal{P}(W_2 \in \hat{R}(c) \mid \mathcal{L}_{\text{train}}(W) < \epsilon_{\text{train}}) \\ &= \int_{\mathbb{R}^{m,k}} \mathcal{P}(W_2 \in \hat{R}(c) \mid \mathcal{L}_{\text{train}}(W) < \epsilon_{\text{train}}, W_1) f(W_1 \mid \mathcal{L}_{\text{train}}(W) < \epsilon_{\text{train}}) dW_1 \end{aligned}$$

1287 Given  $W_1$ , the set  $\{\mathcal{L}_{\text{train}}(W) < \epsilon_{\text{train}}\}$  is again convex and symmetric, and  $W = \frac{1}{\sqrt{mk}} W_1 W_2$  is a  
 1288 zero-centered Gaussian, so again by the Gaussian Correlation inequality (Lemma 39) we have

$$\begin{aligned} & \mathcal{P}(W_2 \in \hat{R}(c) \mid \mathcal{L}_{\text{train}}(W) < \epsilon_{\text{train}}) \\ & \geq \int_{\mathbb{R}^{m,k}} \mathcal{P}(W_2 \in \hat{R}(c) \mid W_1) f(W_1 \mid \mathcal{L}_{\text{train}}(W) < \epsilon_{\text{train}}) dW_1 \\ & = \mathcal{P}(W_2 \in \hat{R}(c)) \int_{\mathbb{R}^{m,k}} f(W_1 \mid \mathcal{L}_{\text{train}}(W) < \epsilon_{\text{train}}) dW_1 \\ & = \mathcal{P}(W_2 \in \hat{R}(c)), \end{aligned}$$

1289 where we have used the fact that the event  $W_2 \in \hat{R}(c)$  is independent of  $W_1$ . Overall we therefore  
 1290 obtain that

$$\mathcal{P}(W_2 \in \hat{R}(c) \mid \mathcal{L}_{\text{train}}(W) < \epsilon_{\text{train}}) \geq \mathcal{P}(W_2 \in \hat{R}(c)).$$



1291 Now note that by Lemma 40, we can choose  $c > 0$  independent of  $k$  such that  $\mathcal{P}(W_2 \in \hat{R}(c))$  is  
 1292 arbitrarily close to 1. We have by Equation (8) that

$$\mathcal{P}(B_R(W) \mid \mathcal{L}_{\text{train}}(W) < \epsilon_{\text{train}}) \geq \int_{\hat{R}(c)} \mathcal{P}(B_R(W) \mid W_2) f(W_2 \mid \mathcal{L}_{\text{train}}(W) < \epsilon_{\text{train}}) dW_2.$$

1293 Now we claim that for  $R(\eta)$  sufficiently large, independent of both  $\epsilon_{\text{train}}$  and  $k$ , the integrand can be  
 1294 made to satisfy

$$\mathcal{P}(B_{R(\eta)}(W) \mid W_2) \geq 1 - \eta$$

1295 for any  $W_2 \in \hat{R}(c)$ . To do this, note that each entry of  $W$  is of the form

$$\frac{1}{\sqrt{mk}} \langle W_{1,i}, W_{2,j} \rangle$$

1296 for some  $i, j \in [m]$ , where  $W_{1,i}$  is the  $i$ th row of  $W_1$ . Each row of  $W_1$  consists of  $k$  independent  
 1297 standard Gaussians, and by assumption  $W_{2,j}$  is a vector of norm  $\leq c\sqrt{k}$ . Thus we have that the  
 1298 product is a Gaussian variable with zero mean and variance  $\|W_{2,j}\|^2 \leq c^2 k$ . Thus after dividing by  
 1299  $\frac{1}{\sqrt{mk}}$  we get a zero-centered Gaussian variable whose variance is independent of  $k$ . It now follows  
 1300 by a union bound that we can select  $R := R(c, m)$  independent of  $k$  and  $\epsilon_{\text{train}}$  such that the matrix  $W$   
 1301 will lie in  $B(0, R)$  with probability larger than  $1 - \eta$  whenever  $W_2 \in \hat{R}(c)$ . Overall we get that

$$\begin{aligned} \mathcal{P}(B_R(W) \mid \mathcal{L}_{\text{train}}(W) < \epsilon_{\text{train}}) &\geq (1 - \eta) \mathcal{P}(W_2 \in \hat{R}(c) \mid \mathcal{L}_{\text{train}}(W) < \epsilon_{\text{train}}) \\ &\geq (1 - \eta) \mathcal{P}(W_2 \in \hat{R}(c)), \end{aligned}$$

1302 which can be made arbitrarily close to 1 (by Lemma 40), as required.  $\square$

1303 We would also like to show that the approximation is precise with respect to the measure of the  
 1304 random matrix  $W_{\text{iid}}$  which  $W$  converges to as  $k \rightarrow \infty$ :

1305 **Lemma 19.** *Let  $W_{\text{iid}}$  be a centered Gaussian matrix (Definition 8). It holds that*

$$\lim_{R \rightarrow \infty} \frac{\mathcal{P}(\mathcal{L}_{\text{train}}(W_{\text{iid}}) < \epsilon_{\text{train}} \cap \mathcal{L}_{\text{gen}}(W_{\text{iid}}) < \epsilon_{\text{gen}} \cap B_R(W_{\text{iid}}))}{\mathcal{P}(\mathcal{L}_{\text{train}}(W_{\text{iid}}) < \epsilon_{\text{train}} \cap B_R(W_{\text{iid}}))} = \mathcal{P}(\mathcal{L}_{\text{gen}}(W_{\text{iid}}) < \epsilon_{\text{gen}}).$$

1306 *Furthermore, this convergence is uniform with respect to  $\epsilon_{\text{train}}, \epsilon_{\text{gen}}$ .*

1307 *Proof.* Since  $B_R, \{\mathcal{L}_{\text{train}}(W) < \epsilon_{\text{train}}\}$  and  $\{\mathcal{L}_{\text{gen}}(W) < \epsilon_{\text{gen}}\}$  are convex and symmetric, we can  
 1308 apply the Gaussian Correlation inequality (Lemma 39) to the numerator to obtain that for all  $R$

$$\begin{aligned} &\frac{\mathcal{P}(\mathcal{L}_{\text{train}}(W_{\text{iid}}) < \epsilon_{\text{train}} \cap \mathcal{L}_{\text{gen}}(W_{\text{iid}}) < \epsilon_{\text{gen}} \cap B_R(W_{\text{iid}}))}{\mathcal{P}(\mathcal{L}_{\text{train}}(W_{\text{iid}}) < \epsilon_{\text{train}} \cap B_R(W_{\text{iid}}))} \\ &\geq \frac{\mathcal{P}(\mathcal{L}_{\text{train}}(W_{\text{iid}}) < \epsilon_{\text{train}} \cap B_R(W_{\text{iid}})) \mathcal{P}(\mathcal{L}_{\text{gen}}(W_{\text{iid}}) < \epsilon_{\text{gen}})}{\mathcal{P}(\mathcal{L}_{\text{train}}(W_{\text{iid}}) < \epsilon_{\text{train}} \cap B_R(W_{\text{iid}}))} \\ &= \mathcal{P}(\mathcal{L}_{\text{gen}}(W_{\text{iid}}) < \epsilon_{\text{gen}}), \end{aligned}$$

1309 hence the same inequality holds in the limit. On the other hand, by applying the Gaussian Correlation  
 1310 inequality to the denominator we get

$$\begin{aligned} &\frac{\mathcal{P}(\mathcal{L}_{\text{train}}(W_{\text{iid}}) < \epsilon_{\text{train}} \cap \mathcal{L}_{\text{gen}}(W_{\text{iid}}) < \epsilon_{\text{gen}} \cap B_R(W_{\text{iid}}))}{\mathcal{P}(\mathcal{L}_{\text{train}}(W_{\text{iid}}) < \epsilon_{\text{train}} \cap B_R(W_{\text{iid}}))} \\ &\leq \frac{\mathcal{P}(\mathcal{L}_{\text{train}}(W_{\text{iid}}) < \epsilon_{\text{train}} \cap \mathcal{L}_{\text{gen}}(W_{\text{iid}}) < \epsilon_{\text{gen}} \cap B_R(W_{\text{iid}}))}{\mathcal{P}(\mathcal{L}_{\text{train}}(W_{\text{iid}}) < \epsilon_{\text{train}}) \mathcal{P}(B_R(W_{\text{iid}}))} \\ &\leq \frac{\mathcal{P}(\mathcal{L}_{\text{train}}(W_{\text{iid}}) < \epsilon_{\text{train}} \cap \mathcal{L}_{\text{gen}}(W_{\text{iid}}) < \epsilon_{\text{gen}})}{\mathcal{P}(\mathcal{L}_{\text{train}}(W_{\text{iid}}) < \epsilon_{\text{train}}) \mathcal{P}(B_R(W_{\text{iid}}))} \\ &= \frac{\mathcal{P}(\mathcal{L}_{\text{train}}(W_{\text{iid}}) < \epsilon_{\text{train}}) \mathcal{P}(\mathcal{L}_{\text{gen}}(W_{\text{iid}}) < \epsilon_{\text{gen}})}{\mathcal{P}(\mathcal{L}_{\text{train}}(W_{\text{iid}}) < \epsilon_{\text{train}}) \mathcal{P}(B_R(W_{\text{iid}}))} \\ &= \frac{\mathcal{P}(\mathcal{L}_{\text{gen}}(W_{\text{iid}}) < \epsilon_{\text{gen}})}{\mathcal{P}(B_R(W_{\text{iid}}))}, \end{aligned}$$

1311 where the second inequality follows by basic probability properties, and the penultimate equality  
 1312 follows by the independence of  $\mathcal{L}_{\text{train}}(W_{\text{iid}}) < \epsilon_{\text{train}}$  and  $\mathcal{L}_{\text{gen}}(W_{\text{iid}}) < \epsilon_{\text{gen}}$ . The ratio  $\frac{\mathcal{P}(\mathcal{L}_{\text{gen}}(W_{\text{iid}}) < \epsilon_{\text{gen}})}{\mathcal{P}(B_R(W_{\text{iid}}))}$   
 1313 tends to  $\mathcal{P}(\mathcal{L}_{\text{gen}}(W_{\text{iid}}) < \epsilon_{\text{gen}})$  as  $R \rightarrow \infty$ , hence the proof is complete.  $\square$

#### 1314 C.4 Proof of Sought-After Result

1315 We are now ready to prove Theorem 9. We assume WLOG that  $W^* = 0$  as all claims are invariant to  
 1316 a mean shift. First note that we have

$$\lim_{k \rightarrow \infty} \mathcal{P}(\mathcal{L}_{\text{gen}}(W) < \epsilon_{\text{gen}}) = \mathcal{P}(\mathcal{L}_{\text{gen}}(W_{\text{iid}}) < \epsilon_{\text{gen}})$$

1317 where  $W_{\text{iid}}$  is a centered Gaussian matrix (Definition 8), hence it suffices to show that

$$\lim_{k \rightarrow \infty} \sup_{\epsilon_{\text{train}} > 0} \mathcal{P}(\mathcal{L}_{\text{gen}}(W) < \epsilon_{\text{gen}} \mid \mathcal{L}_{\text{train}}(W) < \epsilon_{\text{train}}) - \mathcal{P}(\mathcal{L}_{\text{gen}}(W_{\text{iid}}) < \epsilon_{\text{gen}}) = 0.$$

1318 First, let  $\eta_1, \eta_2 > 0$ . We can choose a radius  $R := R(\eta_1, \eta_2) > 0$  such that both

$$\sup_{k \in \mathbb{N}, \epsilon_{\text{train}} > 0} |P(B_R(W) \mid \mathcal{L}_{\text{train}}(W) < \epsilon_{\text{train}}) - 1| < \eta_1$$

1319 and

$$\left| \frac{\mathcal{P}(\mathcal{L}_{\text{train}}(W_{\text{iid}}) < \epsilon_{\text{train}} \cap \mathcal{L}_{\text{gen}}(W_{\text{iid}}) < \epsilon_{\text{gen}} \cap B_R(W_{\text{iid}}))}{\mathcal{P}(\mathcal{L}_{\text{train}}(W_{\text{iid}}) < \epsilon_{\text{train}} \cap B_R(W_{\text{iid}}))} - \mathcal{P}(\mathcal{L}_{\text{gen}}(W_{\text{iid}}) < \epsilon_{\text{gen}}) \right| < \eta_2.$$

1320 Note that such an  $R$  exists by Lemma 18 and Lemma 19. Then, we rewrite the conditional probability  
 1321 using the law of total probability by conditioning on the events that  $W$  is within  $B(0, R)$  and its  
 1322 complement:

$$\begin{aligned} & \mathcal{P}(\mathcal{L}_{\text{gen}}(W) < \epsilon_{\text{gen}} \mid \mathcal{L}_{\text{train}}(W) < \epsilon_{\text{train}}) \\ &= \mathcal{P}(\mathcal{L}_{\text{gen}}(W) < \epsilon_{\text{gen}} \mid \mathcal{L}_{\text{train}}(W) < \epsilon_{\text{train}}, B_R(W)) \mathcal{P}(B_R(W) \mid \mathcal{L}_{\text{train}}(W) < \epsilon_{\text{train}}) \\ &+ \mathcal{P}(\mathcal{L}_{\text{gen}}(W) < \epsilon_{\text{gen}} \mid \mathcal{L}_{\text{train}}(W) < \epsilon_{\text{train}}, B_R(W)^C) \mathcal{P}(B_R(W)^C \mid \mathcal{L}_{\text{train}}(W) < \epsilon_{\text{train}}). \end{aligned}$$

1323 By the choice of  $R$  and the triangle inequality we have

$$\begin{aligned} & \left| \mathcal{P}(\mathcal{L}_{\text{gen}}(W) < \epsilon_{\text{gen}} \mid \mathcal{L}_{\text{train}}(W) < \epsilon_{\text{train}}) - \right. \\ & \left. \mathcal{P}(\mathcal{L}_{\text{gen}}(W) < \epsilon_{\text{gen}} \mid \mathcal{L}_{\text{train}}(W) < \epsilon_{\text{train}}, B_R(W)) \right| < 2\eta_1. \end{aligned}$$

1324 Next, note that

$$\begin{aligned} & \mathcal{P}(\mathcal{L}_{\text{gen}}(W) < \epsilon_{\text{gen}} \mid \mathcal{L}_{\text{train}}(W) < \epsilon_{\text{train}}, B_R(W)) \\ &= \frac{\mathcal{P}(\mathcal{L}_{\text{train}}(W_{\text{iid}}) < \epsilon_{\text{train}} \cap \mathcal{L}_{\text{gen}}(W_{\text{iid}}) < \epsilon_{\text{gen}} \cap B_R(W_{\text{iid}}))}{\mathcal{P}(\mathcal{L}_{\text{train}}(W_{\text{iid}}) < \epsilon_{\text{train}} \cap B_R(W_{\text{iid}}))}. \end{aligned}$$

1325 By Lemma 14, we can divide and multiply by the corresponding probabilities obtained with respect  
 1326 to the matrix  $W_{\text{iid}}$  which we converge to as  $k \rightarrow \infty$ , and rewrite this ratio as

$$\begin{aligned} & \frac{\mathcal{P}(\mathcal{L}_{\text{train}}(W) < \epsilon_{\text{train}} \cap \mathcal{L}_{\text{gen}}(W) < \epsilon_{\text{gen}} \cap B_R(W))}{\mathcal{P}(\mathcal{L}_{\text{train}}(W) < \epsilon_{\text{train}} \cap B_R(W))} \\ &= \frac{\mathcal{P}(\mathcal{L}_{\text{train}}(W_{\text{iid}}) < \epsilon_{\text{train}} \cap \mathcal{L}_{\text{gen}}(W_{\text{iid}}) < \epsilon_{\text{gen}} \cap B_R(W_{\text{iid}}))}{\mathcal{P}(\mathcal{L}_{\text{train}}(W_{\text{iid}}) < \epsilon_{\text{train}} \cap B_R(W_{\text{iid}}))} \cdot \alpha(k, R) \end{aligned}$$

1327 where  $\alpha(k, R) \rightarrow 1$  as  $k \rightarrow \infty$  (uniformly in  $\epsilon_{\text{train}}, \epsilon_{\text{gen}}$ ). Again by the choice of  $R$  we have that

$$\left| \frac{\mathcal{P}(\mathcal{L}_{\text{train}}(W) < \epsilon_{\text{train}} \cap \mathcal{L}_{\text{gen}}(W) < \epsilon_{\text{gen}} \cap B_R(W))}{\mathcal{P}(\mathcal{L}_{\text{train}}(W) < \epsilon_{\text{train}} \cap B_R(W))} - \mathcal{P}(\mathcal{L}_{\text{gen}}(W_{\text{iid}}) < \epsilon_{\text{gen}}) \right| < \eta_2.$$

1328 Overall we obtain that for any  $\epsilon_{\text{train}} > 0$

$$\begin{aligned} & \limsup_{k \rightarrow \infty} \mathcal{P}(\mathcal{L}_{\text{gen}}(W) < \epsilon_{\text{gen}} \mid \mathcal{L}_{\text{train}}(W) < \epsilon_{\text{train}}) \\ & \leq 2\eta_1 + \lim_{k \rightarrow \infty} \mathcal{P}(\mathcal{L}_{\text{gen}}(W) < \epsilon_{\text{gen}} \mid \mathcal{L}_{\text{train}}(W) < \epsilon_{\text{train}}, B_R(W)) \\ & \leq 2\eta_1 + \eta_2 + \mathcal{P}(\mathcal{L}_{\text{gen}}(W_{\text{iid}}) < \epsilon_{\text{gen}}). \end{aligned}$$

1329 Since the above holds for all  $\eta_1, \eta_2 > 0$  we obtain that

$$\limsup_{k \rightarrow \infty} \mathcal{P}(\mathcal{L}_{\text{gen}}(W) < \epsilon_{\text{gen}} \mid \mathcal{L}_{\text{train}}(W) < \epsilon_{\text{train}}) \leq \mathcal{P}(\mathcal{L}_{\text{gen}}(W_{\text{iid}}) < \epsilon_{\text{gen}}) .$$

1330 A symmetric argument applied to  $\liminf_{k \rightarrow \infty} \mathcal{P}(\mathcal{L}_{\text{gen}}(W) < \epsilon_{\text{gen}} \mid \mathcal{L}_{\text{train}}(W) < \epsilon_{\text{train}})$  implies that

$$\liminf_{k \rightarrow \infty} \mathcal{P}(\mathcal{L}_{\text{gen}}(W) < \epsilon_{\text{gen}} \mid \mathcal{L}_{\text{train}}(W) < \epsilon_{\text{train}}) \geq \mathcal{P}(\mathcal{L}_{\text{gen}}(W_{\text{iid}}) < \epsilon_{\text{gen}})$$

1331 and hence

$$\lim_{k \rightarrow \infty} \mathcal{P}(\mathcal{L}_{\text{gen}}(W) < \epsilon_{\text{gen}} \mid \mathcal{L}_{\text{train}}(W) < \epsilon_{\text{train}}) = \mathcal{P}(\mathcal{L}_{\text{gen}}(W_{\text{iid}}) < \epsilon_{\text{gen}}) .$$

1332 Since the above holds uniformly in  $\epsilon > 0$  we conclude that

$$\lim_{k \rightarrow \infty} \sup_{\epsilon_{\text{train}} > 0} \mathcal{P}(\mathcal{L}_{\text{gen}}(W) < \epsilon_{\text{gen}} \mid \mathcal{L}_{\text{train}}(W) < \epsilon_{\text{train}}) - \mathcal{P}(\mathcal{L}_{\text{gen}}(W) < \epsilon_{\text{gen}}) = 0$$

1333 as required.  $\square$

## 1334 D Auxiliary Theorems, Lemmas and Definitions

1335 In this appendix we provide additional theorems, lemmas and definitions used throughout our proofs.

1336 **Definition 8.** Let  $W \in \mathbb{R}^{m, m'}$  be a random matrix. We say that  $W$  is a *centered Gaussian matrix*  
 1337 when the entries of  $W$  are drawn independently from  $\mathcal{N}(0, \nu)$  where  $\nu \in \mathbb{R}_{>0}$  is some fixed variance.

1338 **Lemma 20.** Let  $\mathcal{P}(\cdot)$  be some distribution on  $\mathbb{R}$  that is symmetric, i.e., if  $x \sim \mathcal{P}(\cdot)$  then  $-x \sim \mathcal{P}(\cdot)$ .  
 1339 Let  $f : \mathbb{R} \rightarrow \mathbb{R}$  be some antisymmetric function, i.e.,

$$\forall x \in \mathbb{R}. \quad f(x) = -f(-x).$$

1340 Then

$$\mathbb{E}_{x \sim \mathcal{P}(\cdot)} [f(x)] = 0.$$

1341 *Proof.* Since  $\mathcal{P}(\cdot)$  is symmetric and  $f$  is antisymmetric, it holds that

$$\mathbb{E}_{x \sim \mathcal{P}(\cdot)} [f(x)] = \mathbb{E}_{-x \sim \mathcal{P}(\cdot)} [f(-x)] = - \mathbb{E}_{-x \sim \mathcal{P}(\cdot)} [f(x)] = - \mathbb{E}_{x \sim \mathcal{P}(\cdot)} [f(-x)] .$$

1342 The claim follows by rearranging.  $\square$

1343 **Lemma 21.** Let  $f : \mathbb{R} \rightarrow \mathbb{R}$  be some function,  $A \in \mathbb{R}^{m, m'}$  be some matrix and  $\alpha \in [m']$  be some  
 1344 index. Denote by  $\mathbf{e}_\alpha \in \mathbb{R}^{m'}$  the standard basis vector with 1 in its  $\alpha$  entry and zeros elsewhere. Then

$$f(A)\mathbf{e}_\alpha = f(A\mathbf{e}_\alpha)$$

1345 where  $f$  applied to a matrix or a vector is a shorthand for  $f$  applied to each entry.

1346 *Proof.* Observe that

$$\begin{aligned} f(A)\mathbf{e}_\alpha &= \begin{pmatrix} f(A_{11}) & \cdots & f(A_{1m'}) \\ \vdots & \ddots & \vdots \\ f(A_{m1}) & \cdots & f(A_{mm'}) \end{pmatrix} \mathbf{e}_\alpha \\ &= \begin{pmatrix} f(A_{1\alpha}) \\ \vdots \\ f(A_{m\alpha}) \end{pmatrix} \\ &= f(A\mathbf{e}_\alpha) \end{aligned}$$

1347 as required.  $\square$

1348 **Definition 9.** The *total variational distance (TV distance)* between two random variables  $X, Y$  on  
 1349 the same space  $\Omega$  is defined as

$$TV(X, Y) = \sup_{A \subseteq \Omega} |\mathcal{P}(X \in A) - \mathcal{P}(Y \in A)|$$

1350 **Lemma 22.** For any two random variables  $X, Y$  on the same space  $\Omega$  and any  $c > 0$  It holds that

$$TV(cX, cY) = TV(X, Y)$$

1351 *Proof.* By Definition 9 it holds that

$$TV(X, Y) = \sup_{A \subseteq \Omega} |\mathcal{P}(X \in A) - \mathcal{P}(Y \in A)|$$

1352 For any  $A \subseteq \Omega$  denote  $c \cdot A := \{c \cdot x | x \in A\}$ . Hence the above is equal to

$$\sup_{A \subseteq \Omega} |\mathcal{P}(cX \in c \cdot A) - \mathcal{P}(cY \in c \cdot A)| = TV(cX, cY)$$

1353 as required.  $\square$

1354 **Theorem 11.** Let  $\{W_j\}_{j \in [d]}$  be a set of random matrices where for each  $j \in [d]$ ,  $W_j \in \mathbb{R}^{m_{j+1}, m_j}$   
 1355 where  $m_{d+1} = m$ ,  $m_1 := m'$  and  $m_j = k$  for all  $j = 2, \dots, d$ . Suppose that for each  $j \in [d]$ ,  
 1356 the matrix  $W_j$  is centered Gaussian (Definition 8) with variance  $\frac{1}{m_j}$ . Let  $W = \prod_{j=d}^1 W_j$  and let  
 1357  $W^* \in \mathbb{R}^{m, m'}$  be a centered Gaussian matrix with variance  $\frac{1}{m'}$ . Assume that  $k \geq m$ . Then

$$TV(W, W^*) \leq C(d-1) \sqrt{\frac{m \cdot m'}{k}}$$

1358 for some universal constant  $C > 0$ .

1359 *Proof.* Theorem 1 in Li and Woodruff [61] states that for random matrices  $U_j \in \mathbb{R}^{m_{j+1}, m_j}$ ,  $j \in [d]$   
 1360 where  $m_{d+1} = m$ ,  $m_1 = m'$  and  $m_j = k$ ,  $j = 2, \dots, d$  with entries drawn independently from  
 1361  $\mathcal{N}(0, 1)$ , and a random matrix  $U \in \mathbb{R}^{m, m'}$  with entries drawn independently from  $\mathcal{N}(0, 1)$ , it holds  
 1362 that

$$TV\left(\frac{1}{\sqrt{k}}U, \prod_{j=d}^1 \frac{1}{\sqrt{k}}U_j\right) \leq C(d-1) \sqrt{\frac{m \cdot m'}{k}}$$

1363 for some universal constant  $C > 0$  such. Per Lemma 22, scaling  $\frac{1}{\sqrt{k}}U$  and  $\prod_{j=d}^1 \frac{1}{\sqrt{k}}U_j$  by a factor  
 1364 of  $\frac{\sqrt{k}}{\sqrt{m'}}$  preserves the TV distance between the two random variables. Hence,

$$TV\left(\frac{1}{\sqrt{m'}}U, \prod_{j=d}^2 \frac{1}{\sqrt{k}}U_j \cdot \frac{1}{\sqrt{m'}}U_1\right) = TV\left(\frac{1}{\sqrt{k}}U, \prod_{j=d}^1 \frac{1}{\sqrt{k}}U_j\right) \leq C(d-1) \sqrt{\frac{m \cdot m'}{k}}.$$

1365 The proof concludes by noting that  $W = \prod_{j=d}^2 \frac{1}{\sqrt{k}}U_j \cdot \frac{1}{\sqrt{m'}}U_1$  and  $W^* = \frac{1}{\sqrt{m'}}U$ .  $\square$

1366 **Lemma 23.** Let  $p : \mathbb{R}^d \rightarrow \mathbb{R}$  be some polynomial. The zero set of  $p$ ,

$$\{\mathbf{x} \in \mathbb{R}^d : p(\mathbf{x}) = 0\},$$

1367 is either  $\mathbb{R}^d$  or has Lebesgue measure zero.

1368 *Proof.* See Caron and Traynor [18].  $\square$

1369 **Lemma 24.** For any two matrices  $A \in \mathbb{R}^{m, n}$  and  $B \in \mathbb{R}^{n, p}$  it holds that

$$\|AB\|_F \leq \|A\|_F \|B\|_F$$

1370 *Proof.* This is a classical result that follows from the Cauchy-Schwarz inequality.  $\square$

1371 **Lemma 25.** For any centered gaussian matrix  $X \in \mathbb{R}^{p, q}$  (Definition 8) there exists a sufficiently  
 1372 large constant  $N \in \mathbb{R}_{>0}$  and a constant  $c_{10} \in \mathbb{R}_{>0}$  dependent on  $p, q$  such that with probability at  
 1373 least  $1 - e^{-c_{10}N}$  it holds that

$$\|X\|_F \leq N.$$

1374 *Proof.* This follows from standard concentration inequalities for  $\chi^2$  random variables. □

1375 **Lemma 26.** Let  $A \in \mathbb{R}^{m,n}$  and  $C \in \mathbb{R}^{p,q}$  be matrices with singular value decompositions

$$A = \sum_{i=1}^{r_A} \sigma_i^A \mathbf{u}_i^A (\mathbf{v}_i^A)^\top, \quad C = \sum_{j=1}^{r_C} \sigma_j^C \mathbf{u}_j^C (\mathbf{v}_j^C)^\top.$$

1376 We denote the rank one summands of  $A$  and  $C$  as

$$X_i = \sigma_i^A \mathbf{u}_i^A (\mathbf{v}_i^A)^\top, \quad Y_j = \sigma_j^C \mathbf{u}_j^C (\mathbf{v}_j^C)^\top.$$

1377 Let  $B \in \mathbb{R}^{n,p}$  be a rank one matrix of the form

$$B = \mathbf{u}_B \mathbf{v}_B^\top.$$

1378 Then for any  $i \in [r_A], j \in [r_C]$  it holds that

$$\|ABC\|_F^2 \geq \|X_i B Y_j\|_F^2.$$

1379 *Proof.* Substituting the singular value decompositions of  $A$  and  $C$  into the product, we obtain

$$ABC = \left( \sum_{i=1}^{r_A} X_i \right) B \left( \sum_{j=1}^{r_C} Y_j \right).$$

1380 Expanding the product yields

$$ABC = \sum_{i=1}^{r_A} \sum_{j=1}^{r_C} X_i B Y_j.$$

1381 To show that the terms  $X_i B Y_j$  are mutually orthogonal, we compute the Frobenius inner product  
1382 between two distinct terms:

$$\langle X_i B Y_j, X_{i'} B Y_{j'} \rangle = \text{Tr} \left( (X_i B Y_j)^\top (X_{i'} B Y_{j'}) \right).$$

1383 Using the definitions

$$X_i = \sigma_i^A \mathbf{u}_i^A (\mathbf{v}_i^A)^\top, \quad Y_j = \sigma_j^C \mathbf{u}_j^C (\mathbf{v}_j^C)^\top,$$

1384 the term  $X_i B Y_j$  expands as

$$X_i B Y_j = \sigma_i^A \sigma_j^C \left( (\mathbf{v}_i^A)^\top \mathbf{u}_B \right) (\mathbf{v}_B^\top \mathbf{u}_j^C) \mathbf{u}_i^A (\mathbf{v}_j^C)^\top.$$

1385 Therefore,

$$(X_i B Y_j)^\top = \sigma_i^A \sigma_j^C \left( (\mathbf{v}_i^A)^\top \mathbf{u}_B \right) (\mathbf{v}_B^\top \mathbf{u}_j^C) \mathbf{v}_j^C (\mathbf{u}_i^A)^\top.$$

1386 Likewise,

$$X_{i'} B Y_{j'} = \sigma_{i'}^A \sigma_{j'}^C \left( (\mathbf{v}_{i'}^A)^\top \mathbf{u}_B \right) (\mathbf{v}_B^\top \mathbf{u}_{j'}^C) \mathbf{u}_{i'}^A (\mathbf{v}_{j'}^C)^\top.$$

1387 Substituting into the inner product and factoring out scalars we obtain that

$$\begin{aligned} \langle X_i B Y_j, X_{i'} B Y_{j'} \rangle &= \\ &= \sigma_i^A \sigma_j^C \left( (\mathbf{v}_i^A)^\top \mathbf{u}_B \right) (\mathbf{v}_B^\top \mathbf{u}_j^C) \sigma_{i'}^A \sigma_{j'}^C \left( (\mathbf{v}_{i'}^A)^\top \mathbf{u}_B \right) (\mathbf{v}_B^\top \mathbf{u}_{j'}^C) \text{Tr} \left( \mathbf{v}_j^C (\mathbf{u}_i^A)^\top \mathbf{u}_{i'}^A (\mathbf{v}_{j'}^C)^\top \right). \end{aligned}$$

1388 Using the cyclic property of trace,

$$\text{Tr} \left( \mathbf{v}_j^C (\mathbf{u}_i^A)^\top \mathbf{u}_{i'}^A (\mathbf{v}_{j'}^C)^\top \right) = \left( (\mathbf{v}_{j'}^C)^\top \mathbf{v}_j^C \right) \left( (\mathbf{u}_i^A)^\top \mathbf{u}_{i'}^A \right).$$

1389 Since the singular vectors  $\mathbf{u}_i^A, \mathbf{v}_i^A, \mathbf{u}_j^C, \mathbf{v}_j^C$  are orthonormal,

$$(\mathbf{u}_i^A)^\top \mathbf{u}_{i'}^A = \delta_{ii'}, \quad (\mathbf{v}_j^C)^\top \mathbf{v}_{j'}^C = \delta_{jj'}.$$

1390 Thus, the trace vanishes whenever  $i \neq i'$  or  $j \neq j'$ . Applying the Pythagorean theorem for the  
1391 Frobenius norm,

$$\|ABC\|_F^2 = \sum_{i=1}^{r_A} \sum_{j=1}^{r_C} \|X_i B Y_j\|_F^2.$$

1392 Since every term in the sum is non-negative, for any  $i \in [r_A], j \in [r_C]$  it holds that

$$\|ABC\|_F^2 \geq \|X_i B Y_j\|_F^2$$

1393 as required. □

1394 **Lemma 27.** Let  $W \in \mathbb{R}^{m,n}$  be a centered Gaussian matrix (Definition 8) with variance one. Consider  
 1395 the singular value decomposition (SVD) of  $W$ :

$$W = U\Sigma V^\top,$$

1396 where  $U \in \mathbb{R}^{m,m}$  and  $V \in \mathbb{R}^{n,n}$  are orthogonal matrices, and  $\Sigma$  is a diagonal matrix of singular  
 1397 values. Then, the first left singular vector  $\mathbf{u}_1$  (the first column of  $U$ ) and the first right singular vector  
 1398  $\mathbf{v}_1$  (the first column of  $V$ ) are uniformly distributed on the unit spheres  $S^{m-1}$  and  $S^{n-1}$ , respectively.

1399 *Proof.* Since  $W$  is an  $m, n$  matrix with independent standard normal entries, its distribution is  
 1400 invariant under orthogonal transformations. That is, for any orthogonal matrices  $Q \in O(m)$  and  
 1401  $P \in O(n)$ , the distribution of  $W$  satisfies

$$QWP \stackrel{d}{=} W.$$

1402 This follows from the fact that a Gaussian matrix remains Gaussian after orthogonal transformations,  
 1403 and the standard normal distribution is rotationally invariant.

1404 Consider the singular value decomposition

$$W = U\Sigma V^\top.$$

1405 The left singular vectors of  $W$  are the eigenvectors of  $WW^\top$ , and the right singular vectors are  
 1406 the eigenvectors of  $W^\top W$ . Since  $W$  is rotationally invariant, so is the Gram matrix  $WW^\top$ , which  
 1407 determines the left singular vectors. Specifically, for any fixed orthogonal matrix  $Q$ ,

$$QWW^\top Q^\top \stackrel{d}{=} WW^\top.$$

1408 This implies that the eigenvectors of  $WW^\top$ , which form the columns of  $U$ , must be uniformly dis-  
 1409 tributed on the unit sphere  $S^{m-1}$ , since no particular direction is preferred. Thus,  $\mathbf{u}_1 \sim \text{Unif}(S^{m-1})$ .

1410 Similarly, considering  $W^\top W$ , the right singular vectors (columns of  $V$ ) are eigenvectors of  $W^\top W$ ,  
 1411 and by the same rotational invariance argument,

$$PW^\top WP^\top \stackrel{d}{=} W^\top W$$

1412 for any orthogonal matrix  $P \in O(n)$ . This implies that  $\mathbf{v}_1 \sim \text{Unif}(S^{n-1})$ .

1413 The singular values  $\sigma_1, \dots, \sigma_{\min(m,n)}$  of  $W$  are independent of the singular vectors. This follows  
 1414 from standard results in random matrix theory, where the eigenvectors of a Wishart matrix (which  
 1415 are the singular vectors of  $W$ ) are independent of its eigenvalues (which correspond to the squared  
 1416 singular values of  $W$ ). Thus,  $\mathbf{u}_1$  and  $\mathbf{v}_1$  are independent from the singular values and remain  
 1417 uniformly distributed on their respective spheres.  $\square$

1418 **Definition 10.** The *Gamma function*, denoted by  $\Gamma(z)$  for  $z > 0$ , is defined as:

$$\Gamma(z) = \int_0^\infty t^{z-1} e^{-t} dt.$$

1419 **Lemma 28.** Let  $A \in \mathbb{R}^{m,n}$  be a centered Gaussian matrix (Definition 8) with variance one. Then  
 1420 there exists a constant  $c_{11} \in \mathbb{R}_{>0}$  dependent on  $m, n$  such that for any  $x \in (0, 1)$  it holds that

$$\mathcal{P}(\sigma_1(A) \leq x) \leq c_{11} x^{mn}$$

1421 where  $\sigma_1(A)$  is the largest singular value of  $A$ .

1422 *Proof.* Note that  $\|A\|_F^2$  is a Chi-squared random variable with  $mn$  degrees of freedom, i.e., it holds  
 1423 that  $\|A\|_F^2 \sim \chi_{mn}^2$ . The density of for this distribution is given by

$$f(x; mn) = \begin{cases} \frac{x^{\frac{mn}{2}-1} e^{-\frac{x}{2}}}{2^{\frac{mn}{2}} \Gamma(\frac{mn}{2})}, & x > 0 \\ 0, & x = 0 \end{cases},$$

1424 where  $\Gamma(\cdot)$  is the Gamma function (Definition 10). Hence, we obtain that

$$\mathcal{P}(\|A\|_F^2 \leq x) = \int_0^x f(s; mn) ds = O(x^{\frac{mn}{2}}).$$

1425 Now note that for any matrix  $M \in \mathbb{R}^{m,n}$  it holds that

$$\sigma_1(M)^2 \geq \frac{\|M\|_F^2}{\min\{m, n\}},$$

1426 thus

$$\mathcal{P}(\sigma_1(A) \leq x) = \mathcal{P}(\sigma_1(A)^2 \leq x^2) \leq \mathcal{P}(\|A\|_F^2 \leq \min\{m, n\}x^2) = O(x^{mn})$$

1427 as required.  $\square$

1428 **Lemma 29.** Let  $\mathbf{v} \in \mathbb{R}^n$  be some fixed unit vector, and let  $\mathbf{u}$  be a random vector uniformly distributed  
 1429 on the unit sphere  $S^{n-1}$  in  $\mathbb{R}^n$ . Define  $Z = \langle \mathbf{u}, \mathbf{v} \rangle$  as their inner product. Then there exists a constant  
 1430  $c_{12} \in \mathbb{R}_{>0}$  dependent on  $n$  such that for any  $x \in [-1, 1]$

$$\mathcal{P}(|Z| \leq x) \leq c_{12}|x|.$$

1431 *Proof.* First note that by symmetry, we can assume WLOG that  $\mathbf{v}$  is also uniformly distributed on  
 1432 the unit sphere. By Theorem 1 in Cho [22], the probability density function of  $Z$  for any  $z \in [-1, 1]$   
 1433 is given by:

$$f_Z(z) = \frac{\Gamma(\frac{n}{2})}{\sqrt{\pi} \Gamma(\frac{n-1}{2})} (1 - z^2)^{\frac{n-3}{2}},$$

1434 where  $\Gamma(\cdot)$  is the Gamma function (Definition 10). In particular,  $Z$  has a bounded density supported  
 1435 on  $[-1, 1]$ . It follows that for any  $x \in [-1, 1]$

$$\mathcal{P}(|Z| \leq x) = \int_{-x}^x f_Z(z) dz = O(|x|)$$

1436 as required.  $\square$

1437 **Lemma 30.** For any  $m, n \in \mathbb{N}$  and  $\epsilon \in \mathbb{R}_{>0}$ , there exists a collection of rank 1 matrices  $\{E_i \in$   
 1438  $\mathbb{R}^{m,n}\}_{i \in [M]}$  where  $M$  is dependent on  $m, n$  and  $\epsilon$ , such that for any rank 1 matrix  $E \in \mathbb{R}^{m,n}$  with  
 1439  $\|E\|_F = 1$  there exists some index  $i \in [M]$  for which

$$\|E - E_i\|_F < \epsilon.$$

1440 *Proof.* Standard, see Vershynin [105].  $\square$

1441 **Definition 11.** Let  $X$  be a random vector taking values in  $\mathbb{R}^m$ . The *characteristic function* of  $X$  is  
 1442 the function  $\varphi_X : \mathbb{R}^m \rightarrow \mathbb{C}$  defined for any  $\mathbf{t} \in \mathbb{R}^m$  by:

$$\varphi_X(\mathbf{t}) = \mathbb{E} \left[ e^{i\langle \mathbf{t}, X \rangle} \right],$$

1443 where  $\langle \mathbf{t}, X \rangle$  denotes the standard inner product in  $\mathbb{R}^m$ .

1444 **Lemma 31.** Let  $X$  be a random vector taking values in  $\mathbb{R}^m$  and let  $\phi_X(\mathbf{t})$  be its characteristic  
 1445 function (Definition 11). If  $X$  has a probability density function  $f_X(\mathbf{x})$ , then it can be recovered  
 1446 using the following inversion formula

$$f_X(\mathbf{x}) = \frac{1}{(2\pi)^m} \int_{\mathbb{R}^m} e^{-i\langle \mathbf{t}, \mathbf{x} \rangle} \phi_X(\mathbf{t}) d\mathbf{t}.$$

1447 *Proof.* Standard, see Zitkovic [121].  $\square$

1448 **Lemma 32.** Let  $f : \mathbb{R}^m \rightarrow [0, \infty)$  be a probability density function with characteristic function  
 1449  $\varphi(\mathbf{t})$ . The supremum of  $f$ , denoted by  $\|f\|_\infty := \sup_{\mathbf{x} \in \mathbb{R}^m} |f(\mathbf{x})|$ , is bounded by the  $L^1$ -norm of its  
 1450 characteristic function. Specifically,

$$\|f\|_\infty \leq \frac{1}{(2\pi)^m} \int_{\mathbb{R}^m} |\varphi(\mathbf{t})| d\mathbf{t}.$$

1451 *Proof.* By the Fourier inversion formula for a probability density function  $f$  on  $\mathbb{R}^m$  (Lemma 31):

$$f(\mathbf{x}) = \frac{1}{(2\pi)^m} \int_{\mathbb{R}^m} e^{-i\langle \mathbf{t}, \mathbf{x} \rangle} \varphi(\mathbf{t}) d\mathbf{t}.$$

1452 Taking the absolute value, we get:

$$|f(\mathbf{x})| \leq \frac{1}{(2\pi)^m} \int_{\mathbb{R}^m} |e^{-i\langle \mathbf{t}, \mathbf{x} \rangle}| |\varphi(\mathbf{t})| d\mathbf{t}.$$

1453 Since  $|e^{-i\langle \mathbf{t}, \mathbf{x} \rangle}| = 1$  for all  $\mathbf{t} \in \mathbb{R}^m$ , the latter simplifies to:

$$|f(\mathbf{x})| \leq \frac{1}{(2\pi)^m} \int_{\mathbb{R}^m} |\varphi(\mathbf{t})| d\mathbf{t}.$$

1454 Taking the supremum over all  $\mathbf{x} \in \mathbb{R}^m$ , we obtain:

$$\|f\|_\infty \leq \frac{1}{(2\pi)^m} \int_{\mathbb{R}^m} |\varphi(\mathbf{t})| d\mathbf{t}$$

1455 as required. □

1456 **Lemma 33.** Let  $X$  be a random vector in  $\mathbb{R}^m$  with density function  $f_X(\mathbf{x})$  and characteristic function  
1457  $\phi_X(\mathbf{t})$ . For any two points  $\mathbf{x}, \mathbf{y} \in \mathbb{R}^m$ , the difference between their densities is bounded by:

$$|f_X(\mathbf{x}) - f_X(\mathbf{y})| \leq \frac{\|\mathbf{x} - \mathbf{y}\|_2}{(2\pi)^m} \int_{\mathbb{R}^m} \|\mathbf{t}\|_2 |\phi_X(\mathbf{t})| d\mathbf{t}.$$

1458 *Proof.* From the inversion formula for the density function (Lemma 31), we write:

$$f_X(\mathbf{x}) - f_X(\mathbf{y}) = \frac{1}{(2\pi)^m} \int_{\mathbb{R}^m} (e^{-i\langle \mathbf{t}, \mathbf{x} \rangle} - e^{-i\langle \mathbf{t}, \mathbf{y} \rangle}) \phi_X(\mathbf{t}) d\mathbf{t}.$$

1459 By factoring out the exponentials:

$$e^{-i\langle \mathbf{t}, \mathbf{x} \rangle} - e^{-i\langle \mathbf{t}, \mathbf{y} \rangle} = e^{-i\langle \mathbf{t}, \mathbf{y} \rangle} (1 - e^{i\langle \mathbf{t}, \mathbf{y} - \mathbf{x} \rangle}).$$

1460 Taking absolute values and using the bound:

$$|1 - e^{i\langle \mathbf{t}, \mathbf{y} - \mathbf{x} \rangle}| \leq |\langle \mathbf{t}, \mathbf{y} - \mathbf{x} \rangle|,$$

1461 resulting in

$$|f_X(\mathbf{x}) - f_X(\mathbf{y})| \leq \frac{1}{(2\pi)^m} \int_{\mathbb{R}^m} |\langle \mathbf{t}, \mathbf{y} - \mathbf{x} \rangle| |\phi_X(\mathbf{t})| d\mathbf{t}.$$

1462 Finally, applying the Cauchy-Schwarz inequality we obtain that

$$|\langle \mathbf{t}, \mathbf{y} - \mathbf{x} \rangle| \leq \|\mathbf{t}\|_2 \|\mathbf{x} - \mathbf{y}\|_2,$$

1463 which implies that

$$|f_X(\mathbf{x}) - f_X(\mathbf{y})| \leq \frac{\|\mathbf{x} - \mathbf{y}\|_2}{(2\pi)^m} \int_{\mathbb{R}^m} \|\mathbf{t}\|_2 |\phi_X(\mathbf{t})| d\mathbf{t}$$

1464 as required. □

1465 **Lemma 34.** Let  $X \sim \mathcal{N}(0, \Sigma)$  be a zero-centered Gaussian random vector in  $\mathbb{R}^m$  with covariance  
1466 matrix  $\Sigma \in \mathbb{R}^{m,m}$ . The characteristic function of  $X$  is given for any  $\mathbf{t} \in \mathbb{R}^m$  by:

$$\varphi_X(\mathbf{t}) = \exp\left(-\frac{1}{2} \langle \mathbf{t}, \Sigma \mathbf{t} \rangle\right).$$

1467 *Proof.* Standard, see Vershynin [106]. □



1468 **Lemma 35.** Let  $X \sim \mathcal{N}(0, I_m)$  be a standard Gaussian random vector in  $\mathbb{R}^m$ , and let  $A \in \mathbb{R}^{m,m}$   
 1469 be a positive semi-definite (PSD) matrix. It holds that

$$\mathbb{E} \left[ e^{-X^\top A X} \right] = \frac{1}{\sqrt{\det(I_m + 2A)}}.$$

1470 *Proof.* The expectation is given by:

$$\mathbb{E} \left[ e^{-X^\top A X} \right] = \int_{\mathbb{R}^m} e^{-\mathbf{x}^\top A \mathbf{x}} \frac{1}{(2\pi)^{m/2}} e^{-\frac{1}{2} \mathbf{x}^\top \mathbf{x}} d\mathbf{x}.$$

1471 Combine the exponential terms:

$$e^{-\mathbf{x}^\top A \mathbf{x}} e^{-\frac{1}{2} \mathbf{x}^\top \mathbf{x}} = e^{-\frac{1}{2} \mathbf{x}^\top (2A + I_m) \mathbf{x}}.$$

1472 Thus,

$$\mathbb{E} \left[ e^{-X^\top A X} \right] = \frac{1}{(2\pi)^{m/2}} \int_{\mathbb{R}^m} e^{-\frac{1}{2} \mathbf{x}^\top (2A + I_m) \mathbf{x}} d\mathbf{x}.$$

1473 This is the Gaussian integral over  $\mathbb{R}^m$  for a quadratic form. Using the standard result for multivariate  
 1474 Gaussian integrals

$$\int_{\mathbb{R}^m} e^{-\frac{1}{2} \mathbf{x}^\top B \mathbf{x}} d\mathbf{x} = \frac{(2\pi)^{m/2}}{\sqrt{\det(B)}}$$

1475 where  $B$  is a PSD matrix. Observing that the matrix  $B = I_m + 2A$  is PSD, we conclude that

$$\mathbb{E} \left[ e^{-X^\top A X} \right] = \frac{1}{\sqrt{\det(I_m + 2A)}}$$

1476 as required. □

1477 **Lemma 36.** Let  $f : \mathbb{R}^{m,m} \rightarrow \mathbb{R}$  be a function that depends only on the singular values of a matrix  
 1478  $X \in \mathbb{R}^{m,m}$ . Then, the integral of  $f$  over the space  $\mathbb{R}^{m,m}$  matrices can be expressed as an integral  
 1479 over the singular values as follows:

$$\int_{\mathbb{R}^{m,m}} f(X) dX = C_m \int_{\sigma_1 \geq \sigma_2 \geq \dots \geq \sigma_m \geq 0} f(\boldsymbol{\sigma}) \cdot \Delta(\boldsymbol{\sigma})^2 d\boldsymbol{\sigma}$$

1480 where:

- 1481 •  $C_m$  is a constant depending on the dimension  $m$ .
- 1482 •  $\Delta(\boldsymbol{\sigma}) = \prod_{1 \leq i < j \leq m} (\sigma_i^2 - \sigma_j^2)$  is the Vandermonde determinant of the squared singular  
 1483 values.
- 1484 •  $d\boldsymbol{\sigma}$  represents the differential volume element over the singular values.

1485 *Proof.* Consider the singular value decomposition (SVD) of  $X$ :

$$X = U \Sigma V^\top,$$

1486 where  $U, V \in O(m)$  are orthogonal matrices, and  $\Sigma = \text{diag}(\sigma_1, \sigma_2, \dots, \sigma_m)$  is a diagonal matrix  
 1487 containing the singular values  $\sigma_i$  of  $X$ .

1488 The differential volume element  $dX$  in the space of  $m, m$  matrices can be decomposed into the  
 1489 product of volume elements corresponding to  $U$ ,  $\Sigma$ , and  $V$ , along with the Jacobian determinant of  
 1490 the transformation:

$$dX = J(\Sigma) dU d\Sigma dV$$

1491 where  $J(\Sigma)$  is the Jacobian determinant associated with the change of variables from  $X$  to  $(U, \Sigma, V)$ .

1492 For a function  $f$  that depends only on the singular values, the integral over the orthogonal matrices  $U$   
 1493 and  $V$  contribute to the constant  $C_m$ , allowing us to focus on the integral over the singular values.

1494 The Jacobian determinant  $J(\Sigma)$  for the transformation involving singular values in the space of  $m, m$   
 1495 matrices is given by:

$$J(\Sigma) = \Delta(\sigma)^2$$

1496 where  $\Delta(\sigma) = \prod_{1 \leq i < j \leq m} (\sigma_i^2 - \sigma_j^2)$  (see Rennie [85]).

1497 Therefore, the integral over the space of  $m, m$  matrices can be rewritten as:

$$\int_{\mathbb{R}^{m,m}} f(X) dX = C_m \int_{\sigma_1 \geq \sigma_2 \geq \dots \geq \sigma_m \geq 0} f(\sigma) \cdot \Delta(\sigma)^2 d\sigma$$

1498 where  $d\sigma$  is the measure on the singular values. □

1499 **Corollary 3.** Consider the function  $f(X) = \|X\|_F \left( \frac{1}{\sqrt{\det(I + \frac{X^\top X}{km})}} \right)^k$ , where  $X \in \mathbb{R}^{m,m}$ . Using  
 1500 the change of variables to singular values (Lemma 36):

$$\begin{aligned} & \int_{\mathbb{R}^{m,m}} \|X\|_F \left( \frac{1}{\sqrt{\det(I + \frac{X^\top X}{km})}} \right)^k dX \\ &= C_m \int_{\sigma_1 \geq \sigma_2 \geq \dots \geq \sigma_m \geq 0} \left( \sum_{i=1}^m \sigma_i^2 \right)^{1/2} \cdot \left( \frac{1}{\sqrt{\prod_{i=1}^m (1 + \frac{\sigma_i^2}{km})}} \right)^k \Delta(\sigma)^2 d\sigma, \end{aligned}$$

1501 where:

- 1502 •  $\|X\|_F = (\sum_{i=1}^m \sigma_i^2)^{1/2}$  is the Frobenius norm of  $X$ .
- 1503 •  $\sqrt{\det(I + \frac{X^\top X}{km})} = \sqrt{\prod_{i=1}^m (1 + \frac{\sigma_i^2}{km})}$ .
- 1504 •  $\Delta(\sigma) = \prod_{1 \leq i < j \leq m} (\sigma_i^2 - \sigma_j^2)$  is the Vandermonde determinant of the squared singular  
 1505 values.

1506 This reduces the integral to one over the singular values  $\sigma_1, \sigma_2, \dots, \sigma_m$ .

1507 **Definition 12.** The Beta function, denoted by  $B(x, y)$  for  $x, y > 0$ , is defined as:

$$B(x, y) = \int_0^1 \frac{t^{x-1} (1-t)^{y-1}}{(1-t)^{x+y}} dt.$$

1508 **Lemma 37.** For any  $x, y > 0$  it holds that

$$B(x, y) = \frac{\Gamma(x)\Gamma(y)}{\Gamma(x+y)}.$$

1509 *Proof.* Standard, see Davis [26]. □

1510 **Lemma 38.** For large  $z$ , the ratio of the Gamma function evaluated at  $z$  and  $z + c$  for any constant  $c$   
 1511 satisfies:

$$\frac{\Gamma(z+c)}{\Gamma(z)} \sim z^c \quad \text{as } z \rightarrow \infty.$$

1512 *Proof.* Using Stirling's approximation for the Gamma function:

$$\Gamma(z) \sim \sqrt{2\pi} z^{z-1/2} e^{-z}, \quad \text{as } z \rightarrow \infty,$$

1513 we compute the ratio:

$$\frac{\Gamma(z+c)}{\Gamma(z)} \sim \frac{\sqrt{2\pi}(z+c)^{z+c-1/2}e^{-(z+c)}}{\sqrt{2\pi}z^{z-1/2}e^{-z}}.$$

1514 Simplify the terms:

$$\frac{\Gamma(z+c)}{\Gamma(z)} \sim \frac{(z+c)^{z+c-1/2}e^{-c}}{z^{z-1/2}}.$$

1515 Taking the dominant term for large  $z$ , we approximate  $z+c \sim z$ , so:

$$\frac{\Gamma(z+c)}{\Gamma(z)} \sim z^c$$

1516 as required.  $\square$

1517 **Lemma 39.** Let  $\Phi$  denote a Gaussian measure on  $\mathbb{R}^n$  with mean zero and covariance matrix  $\Sigma$ . For  
 1518 any two closed, symmetric, convex subsets  $A, B \subset \mathbb{R}^n$ , the Gaussian Correlation Inequality (GCI)  
 1519 states:

$$\Phi(A \cap B) \geq \Phi(A)\Phi(B).$$

1520 *Proof.* See Latała and Matlak [58].  $\square$

1521 **Lemma 40.** For all  $\delta > 0$ , there exists a constant  $c(\delta)$  such that with probability at least  $1 - \delta$ , the  
 1522 norm of an  $L$ -dimensional standard Gaussian vector  $X \sim \mathcal{N}(0, I_L)$  satisfies:

$$\|X\| \leq c(\delta)\sqrt{L}.$$

1523 *Proof.* See Vershynin [104].  $\square$

## 1524 E Theorem 3.3 From Soltanolkotabi et al. [92]

1525 Proposition 1 restates Theorem 3.3 from Soltanolkotabi et al. [92] using  $O$ - and  $\tilde{O}$ -notations. For  
 1526 completeness, Proposition 4 below restates the theorem without these notations.

1527 **Proposition 4** (restatement of Theorem 3.3 from [92], without  $O$ - and  $\tilde{O}$ -notations). *There exist*  
 1528 *universal constants  $c_1, \dots, c_{10} \in \mathbb{R}_{>0}$  with which the following holds. Suppose the activation  $\sigma(\cdot)$*   
 1529 *is linear (i.e.,  $\sigma(\alpha) = \alpha$  for all  $\alpha \in \mathbb{R}$ ), and the depth  $d$  equals two. Let  $\kappa \in \mathbb{R}_{>0}$  be the condition*  
 1530 *number of  $W^*$ . Let  $\mathcal{Q}(\cdot)$  be a zero-centered Gaussian probability distribution, i.e.,  $\mathcal{Q}(\cdot) = \mathcal{N}(\cdot; 0, \nu)$ ,*  
 1531 *with variance*

$$0 < \nu \leq \frac{c_1 \|W^*\|_F \sqrt{m'}}{k^{9.5} (\max\{m + m', k\})^4} \left( \frac{\sqrt{k} - \sqrt{r} - 1}{c_2 \kappa^2 \sqrt{\max\{m + m', k\}}} \right)^{c_3 \kappa}$$

1532 (recall that  $r$  is the rank of the ground truth matrix  $W^*$ , whose dimensions are  $m$  and  $m'$ ). Let  $\mathcal{P}(\cdot)$   
 1533 be the probability distribution over weight settings that is generated by  $\mathcal{Q}(\cdot)$  (Definition 3). Assume  
 1534 the measurement matrices  $(A_i)_{i=1}^n$  satisfy an RIP (Definition 1) of order  $2r + 1$  with a constant  
 1535  $\delta \in (0, \min\{1, c_4/(\kappa^3 \sqrt{r})\})$ . Consider minimization of the training loss  $\mathcal{L}_{\text{train}}(\cdot)$  via gradient descent  
 1536 (Equation (7)) with initialization drawn from  $\mathcal{P}(\cdot)$  and step size

$$0 < \eta \leq \frac{c_5}{\kappa^5 \|W^*\|_F} \cdot \frac{1}{\ln \left( \frac{4\sqrt{2}(km')^{1/4} \|W^*\|_F}{\sqrt{\nu}(\sqrt{k} - \sqrt{r} - 1)} \right)}.$$

1537 Then, there exists some  $\tau \in \mathbb{N}$  which satisfies

$$\tau \leq \frac{c_6 \ln \left( \frac{4\sqrt{2}(km')^{1/4} \|W^*\|_F}{\sqrt{\nu}(\sqrt{k} - \sqrt{r} - 1)} \right)}{\eta \sigma_{\min}(W^*)},$$

1538 such that for any width  $k$  of the matrix factorization, after  $\tau$  iterations of gradient descent, with  
 1539 probability at least  $1 - c_7 \exp(-c_8 k) + c_9^{k-r+1}$  over its initialization, the generalization loss  $\mathcal{L}_{\text{gen}}(\cdot)$   
 1540 is no more than  $c_{10} \|W^*\|_F^{7/10} \nu^{3/10} / (km')^{3/20}$ .

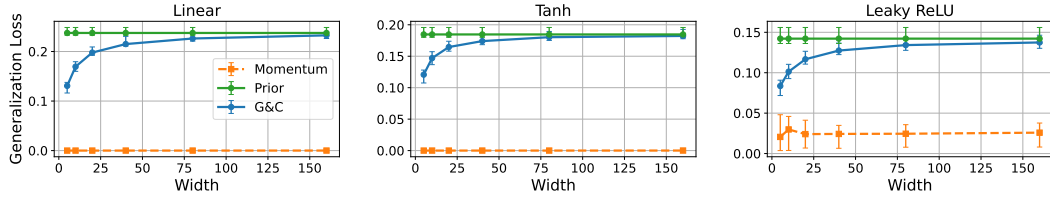

Figure 3: In line with our theory (Section 4.2), as the width of a matrix factorization increases, the generalization attained by G&C deteriorates, to the point of being no better than chance, *i.e.*, no better than the generalization attained by randomly drawing a single weight setting from the prior distribution while disregarding the training data. This figure adheres to the caption of Figure 1, except that we employ gradient descent with a momentum coefficient of 0.9 [79]. For further details see Figure 1 and Appendix G.

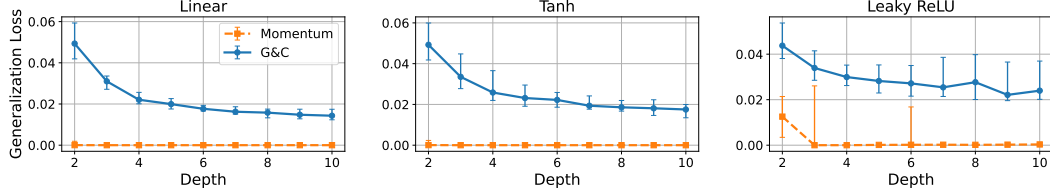

Figure 4: In line with our theory (Section 4.3), as the depth of a matrix factorization increases, the generalization attained by G&C improves, thereby approaching that attained by gradient descent. This figure adheres to the caption of Figure 2, except that we employ gradient descent with a momentum coefficient of 0.9 [79]. For further details see Figure 2 and Appendix G.

## F Further Experiments

Section 5 corroborates our theory by empirically demonstrating that in matrix factorization (Section 3.3), the generalization attained by G&C (Section 3.5) deteriorates as width increases and improves as depth increases, whereas gradient descent (Section 3.4) attains good generalization throughout. This appendix reports further experiments.

Figures 3 and 4 respectively extend Figures 1 and 2 to account for gradient descent with momentum. Figures 5 and 6 respectively extend Figures 1 and 2 to account for a ground truth matrix of rank two. Figures 7 and 8 respectively extend Figures 1 and 2 to account for G&C with a Kaiming Uniform prior distribution. Figures 9 and 10 respectively extend Figures 1 and 2 to a special case where the measurement matrices are indicator matrices (meaning each holds one in a single entry and zeros elsewhere), leading to what is known as *low rank matrix completion*—a problem that has been studied extensively [125, 123, 127, 122, 129, 124]. Finally, Figure 11 extends Figure 2 to account for G&C with a prior distribution that does not include normalization (Definition 3).

## G Experimental Details

In this appendix, we provide experimental details omitted from Section 5 and Appendix F. Code for reproducing all demonstrations will be made publicly available with the camera-ready version of the paper. All experiments were implemented using Pytorch [126] and carried out on a single Nvidia RTX A6000 GPU.

**Ground truth matrix.** In all experiments the ground truth matrices were generated via the following procedure. First, two matrices  $U \in \mathbb{R}^{m,r}$  and  $V \in \mathbb{R}^{r,m'}$  were generated by independently drawing each of their entries from the standard Gaussian distribution  $\mathcal{N}(\cdot; 0, 1)$ . Here  $r$  stands for the desired ground truth matrix rank. Then, the ground truth matrix was set as

$$W^* = \frac{b}{\|UV\|_F} \cdot UV,$$

where  $b$  stands for the desired ground truth matrix norm. This procedure ensured that  $W^*$  had rank  $r$  and norm  $b$ . In the experiments reported in Figures 5 and 6, the ground truth matrices were of rank two and norm one. In the rest of the experiments, the ground truth matrices were of rank one and norm one.

**Measurement matrices.** In all experiments, the training measurement matrices were generated by independently drawing each of their entries from the standard Gaussian distribution  $\mathcal{N}(\cdot; 0, 1)$ , and

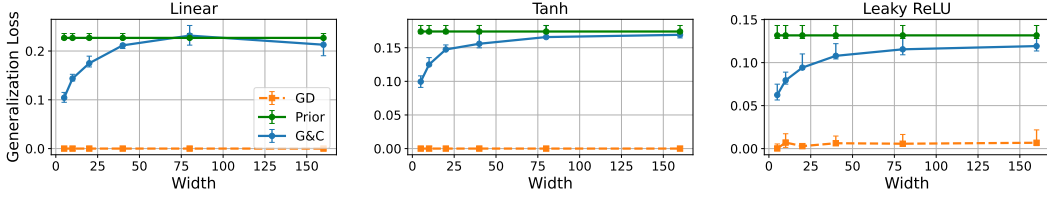

Figure 5: In line with our theory (Section 4.2), as the width of a matrix factorization increases, the generalization attained by G&C deteriorates, to the point of being no better than chance, *i.e.*, no better than the generalization attained by randomly drawing a single weight setting from the prior distribution while disregarding the training data. In contrast, gradient descent attains good generalization across all widths. This figure adheres to the caption of Figure 1, except that the ground truth matrix had rank two and the training data size was  $n = 22$ . For further details see Figure 1 and Appendix G.

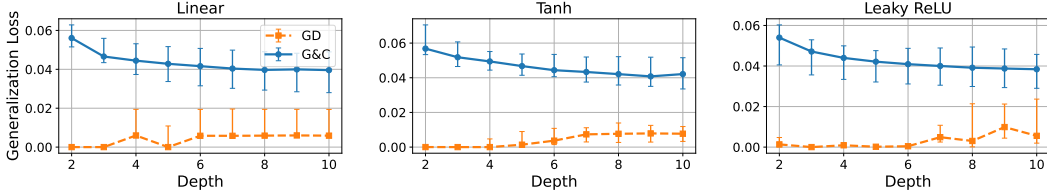

Figure 6: In line with our theory (Section 4.3), as the depth of a matrix factorization increases, the generalization attained by G&C improves, thereby approaching that attained by gradient descent. This figure adheres to the caption of Figure 2, except that the ground truth matrix had rank two and the training data size was  $n = 22$ . We note that with larger depths, the generalization attained by gradient descent is not as good as it is with smaller depths.<sup>6</sup>For further details see Figure 2 and Appendix G.

1569 then normalizing each matrix to have norm one. For each set of training measurements, the corre-  
 1570 sponding orthonormal basis  $\mathcal{B}$  was generated by performing the Gram-Schmidt process and taking the  
 1571 components which were not spanned by the original set of measurements. In the experiments reported  
 1572 in Figures 5 and 6 the amount of training measurements was 22. In the rest of the experiments the  
 1573 amount of training measurements was 15.

1574 **G&C optimization.** A G&C sample consisted of a drawing of the weight matrices  $W_1, \dots, W_d$  and  
 1575 computation of the factorization  $W$  (Equation (4)). If the training loss (Equation (5)) of the given  
 1576 factorization is lower than  $\epsilon_{\text{train}}$  then the sample is considered succesful. Table 1 reports the value of  
 1577  $\epsilon_{\text{train}}$  used in each experiment.

1578 For each trial—that is, for each random draw of the ground truth and measurement matrices—the  
 1579 G&C algorithm was executed by drawing `num_samples` samples and averaging the generalization  
 1580 losses of all succesful samples. Table 2 reports the value of `num_samples` used in each experiment.

1581 To efficiently execute the G&C algorithm, the following batched implementation was used. Given  
 1582 a sample batch size `bs`, for each layer  $j \in [d]$ , the layer’s weight matrices  $W_j \in \mathbb{R}^{m_{j+1}, m_j}$  were:  
 1583 (i) drawn in parallel as a tensor of dimensions  $(\text{bs}, m_{j+1}, m_j)$ ; (ii) multiplied in parallel with the  
 1584 factorizations produced in the previous layer via the `bmm(.)` function of Pytorch; and; (iii) applied the  
 1585 activation function elementwise. The weights of the  $j$ th layer were drawn with independent entries  
 1586 from either  $\mathcal{N}(\cdot; 0, 1)$  or  $\mathcal{U}(\cdot; -1, 1)$  and then scaled by  $\sqrt{m_j}$ . This procedure was performed until a  
 1587 total of `num_samples` samples are accumulated. In experiments where the final factorizations were  
 1588 normalized, a softening constant of size  $10^{-6}$  was added to the denominator.

1589 **GD optimization.** In all of the experiments we trained gradient descent using the empirical sum of  
 1590 squared errors as a loss function and optimized over full batches.

1591 All weights matrices were initialized as follows. First, for each layer  $j \in [d]$ , the layer’s weight matrix  
 1592  $W_j \in \mathbb{R}^{m_{j+1}, m_j}$  was drawn with independent entries from  $\mathcal{U}(\cdot; -1/\sqrt{m_j}, 1/\sqrt{m_j})$  (this is the  
 1593 default Pytorch initialization). Next, in order to facilitate a near-zero initialization, all weight matrices  
 1594 were further scaled by a scalar `init_scale`. `init_scale` was set to  $10^{-3}$  in all the experiments

<sup>6</sup>We examined weight settings found by gradient descent, and observed that with larger depths, the factorized matrix  $W$  (Equation (4)) had an effective rank [128] lower than that of the ground truth matrix  $W^*$ . This aligns with the conventional wisdom by which adding layers to a matrix factorization leads gradient descent to have stronger implicit bias towards low rank [5, 23]. The fact that it was possible to fit the training data with an effective rank lower than that of the ground truth matrix, is an artifact of the training data size being limited in order to ensure reasonable runtime by G&C.

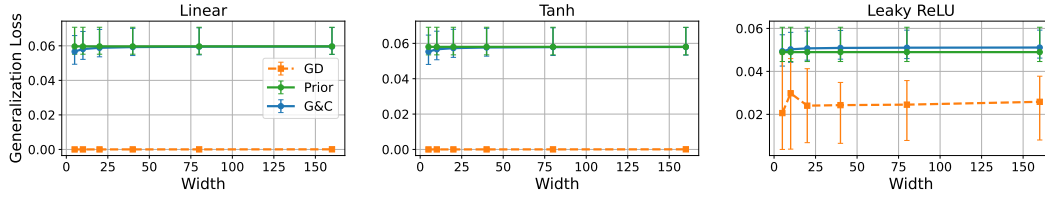

Figure 7: In line with our theory (Section 4.2), as the width of a matrix factorization increases, the generalization attained by G&C deteriorates, to the point of being no better than chance, *i.e.*, no better than the generalization attained by randomly drawing a single weight setting from the prior distribution while disregarding the training data. This figure adheres to the caption of Figure 1, except that the prior distribution of G&C was Kaiming Uniform. For further details see Figure 1 and Appendix G.

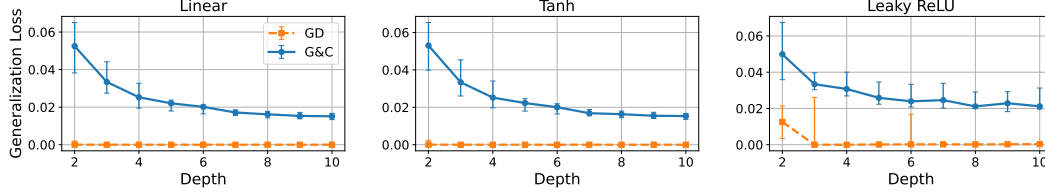

Figure 8: In line with our theory (Section 4.3), as the depth of a matrix factorization increases, the generalization attained by G&C improves, thereby approaching that attained by gradient descent. This figure adheres to the caption of Figure 2, except that the prior distribution of G&C was Kaiming Uniform. For further details see Figure 2 and Appendix G.

of Figures 1, 3, 5, 7, and 9. Table 3 reports the values of `init_scale` used in the experiments of Figures 2, 4, 6, 8, 10, and 11.

In order to facilitate more efficient experimentation, we optimized using gradient descent with an adaptive learning rate scheme, where at each iteration a base learning rate is divided by the square root of an exponential moving average of squared gradient norms (see appendix D.2 in Razin et al. [84] for more details). We used a weighted average coefficient of  $\alpha = 0.99$  and a softening constant of  $10^{-6}$ . Note that only the learning rate (step size) is affected by this scheme, not the direction of movement. Comparisons between the adaptive scheme and optimization with a fixed learning rate showed no significant difference in terms of the dynamics, while run times of the former were considerably shorter. The base learning rate  $\eta$  was set to  $10^{-4}$  in all the experiments of Figures 1, 3, 5, 7, and 9. Table 4 specifies the base learning rates used in the experiments of Figures 2, 4, 6, 8, 10, and 11. Table 5 specifies the number of epochs used in each experiment.

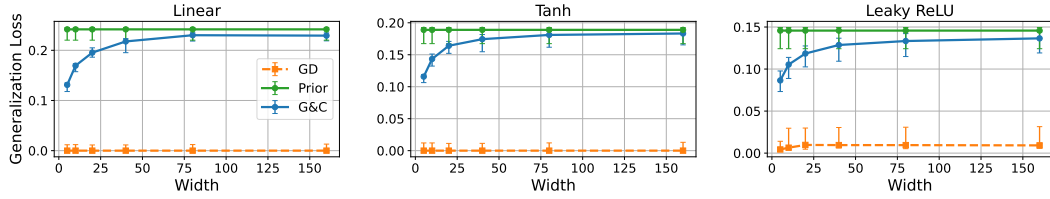

Figure 9: In line with our theory (Section 4.2), as the width of a matrix factorization increases, the generalization attained by G&C deteriorates, to the point of being no better than chance, *i.e.*, no better than the generalization attained by randomly drawing a single weight setting from the prior distribution while disregarding the training data. This figure adheres to the caption of Figure 1, except that measurement matrices were indicator matrices (meaning each held one in a single entry and zeros elsewhere), leading to a low rank matrix completion problem. For further details see Figure 1 and Appendix G.

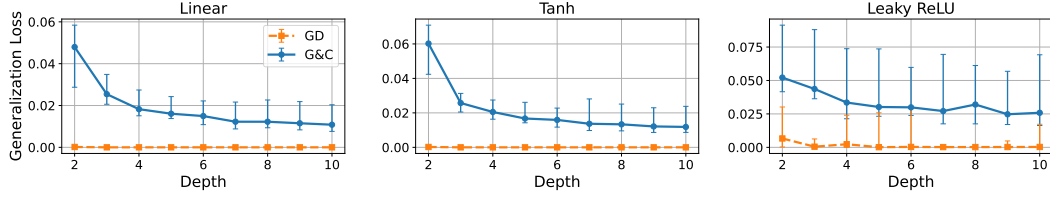

Figure 10: In line with our theory (Section 4.3), as the depth of a matrix factorization increases, the generalization attained by G&C improves, thereby approaching that attained by gradient descent. This figure adheres to the caption of Figure 2, except that measurement matrices were indicator matrices (meaning each held one in a single entry and zeros elsewhere), leading to a low rank matrix completion problem. For further details see Figure 2 and Appendix G.

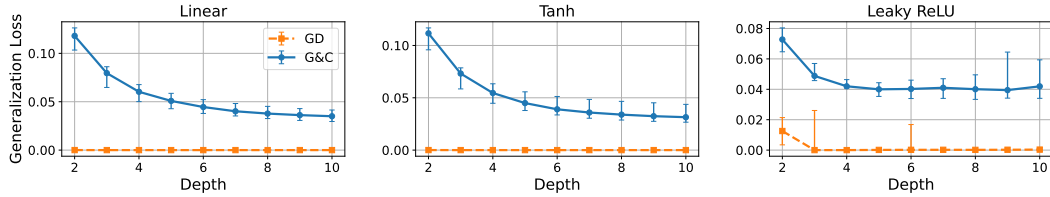

Figure 11: In line with our theory (Section 4.3), as the depth of a matrix factorization increases, the generalization attained by G&C improves, thereby approaching that attained by gradient descent. This figure adheres to the caption of Figure 2, except that the prior distribution of G&C did not include normalization. For further details see Figure 2 and Appendix G.

Table 1: Training error  $\epsilon_{\text{train}}$  used in the experiments of Figures 1 to 11.

| Setting                   | $\epsilon_{\text{train}}$ |
|---------------------------|---------------------------|
| Figures 1, 3, 5, 7, and 9 | 0.02                      |
| Figures 2, 4, 8, and 10   | 0.0035                    |
| Figures 6 and 11          | 0.01                      |

Table 2: Number of G&C samples used in the experiments of Figures 1 to 11.

| Setting                        | num_samples |
|--------------------------------|-------------|
| Figures 1, 3, 5, 7, and 9      | $10^8$      |
| Figures 2, 4, 6, 8, 10, and 11 | $10^9$      |

Table 3: Gradient descent initialization scale used in the experiments of Figures 2, 4, 6, 8, 10, and 11 (increasing depth). The first three columns (left) specify the experiment (setting, activation function and associated depths  $d$ ), and the last column specifies value of `init_scale` used.

| Setting                        | Activation               | $d$        | init_scale |
|--------------------------------|--------------------------|------------|------------|
| Figures 2, 4, 6, 8, 10, and 11 | Linear, Tanh, Leaky ReLU | 2, 3, 4    | 0.001      |
| Figures 2, 4, 6, 8, 10, and 11 | Linear, Tanh             | 5, 6, 7, 8 | 0.1        |
| Figures 2, 4, 6, 8, 10, and 11 | Linear, Tanh             | 9, 10      | 0.2        |
| Figures 2, 4, 6, 8, 10, and 11 | Leaky ReLU               | 5          | 0.03       |
| Figures 2, 4, 6, 8, 10, and 11 | Leaky ReLU               | 6, 7       | 0.1        |
| Figures 2, 4, 6, 8, 10, and 11 | Leaky ReLU               | 8, 9       | 0.2        |
| Figures 2, 4, 6, 8, 10, and 11 | Leaky ReLU               | 10         | 0.8        |

Table 4: Gradient descent base learning rate used in the experiments of Figures 2, 4, 6, 8, 10, and 11 (increasing depth). The first three columns (left) specify the experiment (setting, activation function and associated depths  $d$ ), and the last column specifies the base learning rate  $\eta$  used.

| Setting                        | Activation   | $d$             | $\eta$ |
|--------------------------------|--------------|-----------------|--------|
| Figures 2, 4, 6, 8, 10, and 11 | Linear, Tanh | 2, $\dots$ , 10 | 0.01   |
| Figures 2, 4, 6, 8, 10, and 11 | Leaky ReLU   | 2, 3, 4         | 0.01   |
| Figures 2, 4, 6, 8, 10, and 11 | Leaky ReLU   | 5, $\dots$ , 10 | 0.1    |

Table 5: Number of gradient descent epochs used in the experiments of Figures 1 to 11. The first two columns (left) specify the experiment (setting and activation functions), and the last column specifies the number of epochs used.

| Setting                        | Activation               | Number of Epochs |
|--------------------------------|--------------------------|------------------|
| Figures 1, 3, 5, 7, and 9      | Linear, Tanh, Leaky ReLU | 100000           |
| Figures 2, 4, 8, 10, and 11    | Linear, Tanh             | 20000            |
| Figure 6                       | Linear, Tanh             | 50000            |
| Figures 2, 4, 6, 8, 10, and 11 | Leaky ReLU               | 50000            |



## 1607 NeurIPS Paper Checklist

### 1608 1. Claims

1609 Question: Do the main claims made in the abstract and introduction accurately reflect the  
1610 paper's contributions and scope?

1611 Answer: [\[Yes\]](#)

1612 Justification: All of our theoretical claims and empirical results are clearly presented in  
1613 Sections 3 and 4 and Section 5 respectively.

1614 Guidelines:

- 1615 • The answer NA means that the abstract and introduction do not include the claims  
1616 made in the paper.
- 1617 • The abstract and/or introduction should clearly state the claims made, including the  
1618 contributions made in the paper and important assumptions and limitations. A No or  
1619 NA answer to this question will not be perceived well by the reviewers.
- 1620 • The claims made should match theoretical and experimental results, and reflect how  
1621 much the results can be expected to generalize to other settings.
- 1622 • It is fine to include aspirational goals as motivation as long as it is clear that these goals  
1623 are not attained by the paper.

### 1624 2. Limitations

1625 Question: Does the paper discuss the limitations of the work performed by the authors?

1626 Answer: [\[Yes\]](#)

1627 Justification: The limitations of our work are properly discussed in Section 6.

1628 Guidelines:

- 1629 • The answer NA means that the paper has no limitation while the answer No means that  
1630 the paper has limitations, but those are not discussed in the paper.
- 1631 • The authors are encouraged to create a separate "Limitations" section in their paper.
- 1632 • The paper should point out any strong assumptions and how robust the results are to  
1633 violations of these assumptions (e.g., independence assumptions, noiseless settings,  
1634 model well-specification, asymptotic approximations only holding locally). The authors  
1635 should reflect on how these assumptions might be violated in practice and what the  
1636 implications would be.
- 1637 • The authors should reflect on the scope of the claims made, e.g., if the approach was  
1638 only tested on a few datasets or with a few runs. In general, empirical results often  
1639 depend on implicit assumptions, which should be articulated.
- 1640 • The authors should reflect on the factors that influence the performance of the approach.  
1641 For example, a facial recognition algorithm may perform poorly when image resolution  
1642 is low or images are taken in low lighting. Or a speech-to-text system might not be  
1643 used reliably to provide closed captions for online lectures because it fails to handle  
1644 technical jargon.
- 1645 • The authors should discuss the computational efficiency of the proposed algorithms  
1646 and how they scale with dataset size.
- 1647 • If applicable, the authors should discuss possible limitations of their approach to  
1648 address problems of privacy and fairness.
- 1649 • While the authors might fear that complete honesty about limitations might be used by  
1650 reviewers as grounds for rejection, a worse outcome might be that reviewers discover  
1651 limitations that aren't acknowledged in the paper. The authors should use their best  
1652 judgment and recognize that individual actions in favor of transparency play an impor-  
1653 tant role in developing norms that preserve the integrity of the community. Reviewers  
1654 will be specifically instructed to not penalize honesty concerning limitations.

### 1655 3. Theory assumptions and proofs

1656 Question: For each theoretical result, does the paper provide the full set of assumptions and  
1657 a complete (and correct) proof?

Answer: [Yes]

Justification: All of our assumptions are clearly presented before each claim. All claims are rigorously proven in the appendix, with short proof sketches in the main paper.

Guidelines:

- The answer NA means that the paper does not include theoretical results.
- All the theorems, formulas, and proofs in the paper should be numbered and cross-referenced.
- All assumptions should be clearly stated or referenced in the statement of any theorems.
- The proofs can either appear in the main paper or the supplemental material, but if they appear in the supplemental material, the authors are encouraged to provide a short proof sketch to provide intuition.
- Inversely, any informal proof provided in the core of the paper should be complemented by formal proofs provided in appendix or supplemental material.
- Theorems and Lemmas that the proof relies upon should be properly referenced.

#### 4. Experimental result reproducibility

Question: Does the paper fully disclose all the information needed to reproduce the main experimental results of the paper to the extent that it affects the main claims and/or conclusions of the paper (regardless of whether the code and data are provided or not)?

Answer: [Yes]

Justification: We provide all implementation details in Appendix G, and plan on releasing our code publicly.

Guidelines:

- The answer NA means that the paper does not include experiments.
- If the paper includes experiments, a No answer to this question will not be perceived well by the reviewers: Making the paper reproducible is important, regardless of whether the code and data are provided or not.
- If the contribution is a dataset and/or model, the authors should describe the steps taken to make their results reproducible or verifiable.
- Depending on the contribution, reproducibility can be accomplished in various ways. For example, if the contribution is a novel architecture, describing the architecture fully might suffice, or if the contribution is a specific model and empirical evaluation, it may be necessary to either make it possible for others to replicate the model with the same dataset, or provide access to the model. In general, releasing code and data is often one good way to accomplish this, but reproducibility can also be provided via detailed instructions for how to replicate the results, access to a hosted model (e.g., in the case of a large language model), releasing of a model checkpoint, or other means that are appropriate to the research performed.
- While NeurIPS does not require releasing code, the conference does require all submissions to provide some reasonable avenue for reproducibility, which may depend on the nature of the contribution. For example
  - (a) If the contribution is primarily a new algorithm, the paper should make it clear how to reproduce that algorithm.
  - (b) If the contribution is primarily a new model architecture, the paper should describe the architecture clearly and fully.
  - (c) If the contribution is a new model (e.g., a large language model), then there should either be a way to access this model for reproducing the results or a way to reproduce the model (e.g., with an open-source dataset or instructions for how to construct the dataset).
  - (d) We recognize that reproducibility may be tricky in some cases, in which case authors are welcome to describe the particular way they provide for reproducibility. In the case of closed-source models, it may be that access to the model is limited in some way (e.g., to registered users), but it should be possible for other researchers to have some path to reproducing or verifying the results.

#### 5. Open access to data and code

1712 Question: Does the paper provide open access to the data and code, with sufficient instruc-  
1713 tions to faithfully reproduce the main experimental results, as described in supplemental  
1714 material?

1715 Answer: [Yes]

1716 Justification: We provide all implementation details in Appendix G, and plan on releasing  
1717 our code publicly.

1718 Guidelines:

- 1719 • The answer NA means that paper does not include experiments requiring code.
- 1720 • Please see the NeurIPS code and data submission guidelines ([https://nips.cc/](https://nips.cc/public/guides/CodeSubmissionPolicy)  
1721 [public/guides/CodeSubmissionPolicy](https://nips.cc/public/guides/CodeSubmissionPolicy)) for more details.
- 1722 • While we encourage the release of code and data, we understand that this might not be  
1723 possible, so “No” is an acceptable answer. Papers cannot be rejected simply for not  
1724 including code, unless this is central to the contribution (e.g., for a new open-source  
1725 benchmark).
- 1726 • The instructions should contain the exact command and environment needed to run to  
1727 reproduce the results. See the NeurIPS code and data submission guidelines ([https://](https://nips.cc/public/guides/CodeSubmissionPolicy)  
1728 [nips.cc/public/guides/CodeSubmissionPolicy](https://nips.cc/public/guides/CodeSubmissionPolicy)) for more details.
- 1729 • The authors should provide instructions on data access and preparation, including how  
1730 to access the raw data, preprocessed data, intermediate data, and generated data, etc.
- 1731 • The authors should provide scripts to reproduce all experimental results for the new  
1732 proposed method and baselines. If only a subset of experiments are reproducible, they  
1733 should state which ones are omitted from the script and why.
- 1734 • At submission time, to preserve anonymity, the authors should release anonymized  
1735 versions (if applicable).
- 1736 • Providing as much information as possible in supplemental material (appended to the  
1737 paper) is recommended, but including URLs to data and code is permitted.

## 1738 6. Experimental setting/details

1739 Question: Does the paper specify all the training and test details (e.g., data splits, hyper-  
1740 parameters, how they were chosen, type of optimizer, etc.) necessary to understand the  
1741 results?

1742 Answer: [Yes]

1743 Justification: We provide all implementation details in Appendix G, and plan on releasing  
1744 our code publicly.

1745 Guidelines:

- 1746 • The answer NA means that the paper does not include experiments.
- 1747 • The experimental setting should be presented in the core of the paper to a level of detail  
1748 that is necessary to appreciate the results and make sense of them.
- 1749 • The full details can be provided either with the code, in appendix, or as supplemental  
1750 material.

## 1751 7. Experiment statistical significance

1752 Question: Does the paper report error bars suitably and correctly defined or other appropriate  
1753 information about the statistical significance of the experiments?

1754 Answer: [Yes]

1755 Justification: The results reported in Section 5 and Appendix F show the medians and their  
1756 corresponding inter-quartile ranges, each computed from eight distinct random seeds.

1757 Guidelines:

- 1758 • The answer NA means that the paper does not include experiments.
- 1759 • The authors should answer "Yes" if the results are accompanied by error bars, confi-  
1760 dence intervals, or statistical significance tests, at least for the experiments that support  
1761 the main claims of the paper.

- The factors of variability that the error bars are capturing should be clearly stated (for example, train/test split, initialization, random drawing of some parameter, or overall run with given experimental conditions).
- The method for calculating the error bars should be explained (closed form formula, call to a library function, bootstrap, etc.)
- The assumptions made should be given (e.g., Normally distributed errors).
- It should be clear whether the error bar is the standard deviation or the standard error of the mean.
- It is OK to report 1-sigma error bars, but one should state it. The authors should preferably report a 2-sigma error bar than state that they have a 96% CI, if the hypothesis of Normality of errors is not verified.
- For asymmetric distributions, the authors should be careful not to show in tables or figures symmetric error bars that would yield results that are out of range (e.g. negative error rates).
- If error bars are reported in tables or plots, The authors should explain in the text how they were calculated and reference the corresponding figures or tables in the text.

## 8. Experiments compute resources

Question: For each experiment, does the paper provide sufficient information on the computer resources (type of compute workers, memory, time of execution) needed to reproduce the experiments?

Answer: [Yes]

Justification: We provide all implementation details in Appendix G, and plan on releasing our code publicly.

Guidelines:

- The answer NA means that the paper does not include experiments.
- The paper should indicate the type of compute workers CPU or GPU, internal cluster, or cloud provider, including relevant memory and storage.
- The paper should provide the amount of compute required for each of the individual experimental runs as well as estimate the total compute.
- The paper should disclose whether the full research project required more compute than the experiments reported in the paper (e.g., preliminary or failed experiments that didn't make it into the paper).

## 9. Code of ethics

Question: Does the research conducted in the paper conform, in every respect, with the NeurIPS Code of Ethics <https://neurips.cc/public/EthicsGuidelines>?

Answer: [Yes]

Justification: This paper fully conforms with the NeurIPS Code of Ethics.

Guidelines:

- The answer NA means that the authors have not reviewed the NeurIPS Code of Ethics.
- If the authors answer No, they should explain the special circumstances that require a deviation from the Code of Ethics.
- The authors should make sure to preserve anonymity (e.g., if there is a special consideration due to laws or regulations in their jurisdiction).

## 10. Broader impacts

Question: Does the paper discuss both potential positive societal impacts and negative societal impacts of the work performed?

Answer: [NA]

Justification: The paper deals with theoretical properties of generalization in deep learning, and the work performed has no societal impact.

Guidelines:

- The answer NA means that there is no societal impact of the work performed.

- If the authors answer NA or No, they should explain why their work has no societal impact or why the paper does not address societal impact.
- Examples of negative societal impacts include potential malicious or unintended uses (e.g., disinformation, generating fake profiles, surveillance), fairness considerations (e.g., deployment of technologies that could make decisions that unfairly impact specific groups), privacy considerations, and security considerations.
- The conference expects that many papers will be foundational research and not tied to particular applications, let alone deployments. However, if there is a direct path to any negative applications, the authors should point it out. For example, it is legitimate to point out that an improvement in the quality of generative models could be used to generate deepfakes for disinformation. On the other hand, it is not needed to point out that a generic algorithm for optimizing neural networks could enable people to train models that generate Deepfakes faster.
- The authors should consider possible harms that could arise when the technology is being used as intended and functioning correctly, harms that could arise when the technology is being used as intended but gives incorrect results, and harms following from (intentional or unintentional) misuse of the technology.
- If there are negative societal impacts, the authors could also discuss possible mitigation strategies (e.g., gated release of models, providing defenses in addition to attacks, mechanisms for monitoring misuse, mechanisms to monitor how a system learns from feedback over time, improving the efficiency and accessibility of ML).

## 11. Safeguards

Question: Does the paper describe safeguards that have been put in place for responsible release of data or models that have a high risk for misuse (e.g., pretrained language models, image generators, or scraped datasets)?

Answer: [NA]

Justification: The paper does not deal with data or models that have a high risk for misuse.

Guidelines:

- The answer NA means that the paper poses no such risks.
- Released models that have a high risk for misuse or dual-use should be released with necessary safeguards to allow for controlled use of the model, for example by requiring that users adhere to usage guidelines or restrictions to access the model or implementing safety filters.
- Datasets that have been scraped from the Internet could pose safety risks. The authors should describe how they avoided releasing unsafe images.
- We recognize that providing effective safeguards is challenging, and many papers do not require this, but we encourage authors to take this into account and make a best faith effort.

## 12. Licenses for existing assets

Question: Are the creators or original owners of assets (e.g., code, data, models), used in the paper, properly credited and are the license and terms of use explicitly mentioned and properly respected?

Answer: [NA]

Justification: The paper does not use existing assets.

Guidelines:

- The answer NA means that the paper does not use existing assets.
- The authors should cite the original paper that produced the code package or dataset.
- The authors should state which version of the asset is used and, if possible, include a URL.
- The name of the license (e.g., CC-BY 4.0) should be included for each asset.
- For scraped data from a particular source (e.g., website), the copyright and terms of service of that source should be provided.

- If assets are released, the license, copyright information, and terms of use in the package should be provided. For popular datasets, [paperswithcode.com/datasets](https://paperswithcode.com/datasets) has curated licenses for some datasets. Their licensing guide can help determine the license of a dataset.
- For existing datasets that are re-packaged, both the original license and the license of the derived asset (if it has changed) should be provided.
- If this information is not available online, the authors are encouraged to reach out to the asset's creators.

### 13. New assets

Question: Are new assets introduced in the paper well documented and is the documentation provided alongside the assets?

Answer: [\[Yes\]](#)

Justification: We provide all implementation details in Appendix G, and plan on releasing our code publicly.

Guidelines:

- The answer NA means that the paper does not release new assets.
- Researchers should communicate the details of the dataset/code/model as part of their submissions via structured templates. This includes details about training, license, limitations, etc.
- The paper should discuss whether and how consent was obtained from people whose asset is used.
- At submission time, remember to anonymize your assets (if applicable). You can either create an anonymized URL or include an anonymized zip file.

### 14. Crowdsourcing and research with human subjects

Question: For crowdsourcing experiments and research with human subjects, does the paper include the full text of instructions given to participants and screenshots, if applicable, as well as details about compensation (if any)?

Answer: [\[NA\]](#)

Justification: The paper does not involve crowdsourcing nor research with human subjects.

Guidelines:

- The answer NA means that the paper does not involve crowdsourcing nor research with human subjects.
- Including this information in the supplemental material is fine, but if the main contribution of the paper involves human subjects, then as much detail as possible should be included in the main paper.
- According to the NeurIPS Code of Ethics, workers involved in data collection, curation, or other labor should be paid at least the minimum wage in the country of the data collector.

### 15. Institutional review board (IRB) approvals or equivalent for research with human subjects

Question: Does the paper describe potential risks incurred by study participants, whether such risks were disclosed to the subjects, and whether Institutional Review Board (IRB) approvals (or an equivalent approval/review based on the requirements of your country or institution) were obtained?

Answer: [\[NA\]](#)

Justification: The paper does not involve crowdsourcing nor research with human subjects.

Guidelines:

- The answer NA means that the paper does not involve crowdsourcing nor research with human subjects.
- Depending on the country in which research is conducted, IRB approval (or equivalent) may be required for any human subjects research. If you obtained IRB approval, you should clearly state this in the paper.

1917                   • We recognize that the procedures for this may vary significantly between institutions  
1918                   and locations, and we expect authors to adhere to the NeurIPS Code of Ethics and the  
1919                   guidelines for their institution.  
1920                   • For initial submissions, do not include any information that would break anonymity (if  
1921                   applicable), such as the institution conducting the review.

1922   **16. Declaration of LLM usage**

1923   Question: Does the paper describe the usage of LLMs if it is an important, original, or  
1924   non-standard component of the core methods in this research? Note that if the LLM is used  
1925   only for writing, editing, or formatting purposes and does not impact the core methodology,  
1926   scientific rigorousness, or originality of the research, declaration is not required.

1927   Answer: [NA]

1928   Justification: The core method development in this research does not involve LLMs as any  
1929   important, original, or non-standard components.

1930   Guidelines:

1931                   • The answer NA means that the core method development in this research does not  
1932                   involve LLMs as any important, original, or non-standard components.  
1933                   • Please refer to our LLM policy (<https://neurips.cc/Conferences/2025/LLM>)  
1934                   for what should or should not be described.
